# Supplementary material for: The rationalized pathway from field-induced slow magnetic relaxation in CoII–WIV chains to single-chain magnetism in isotopological CoII–WV analogues
Source: Royal Society of Chemistry journal article supplement (doi:10.1039/d1qi01427g), 2022-01-01
Supplement: d1qi01427g4.pdf [file d1qi01427g4.pdf]

## Supporting Information

### The rationalized pathway from field-induced slow magnetic relaxation in Co<sup>II</sup>–W<sup>IV</sup> chains to single-chain magnetism in isotopological Co<sup>II</sup>–W<sup>V</sup> analogues

Tomasz Charytanowicz, Robert Jankowski, Mikolaj Zychowicz, Szymon Chorazy,\* and Barbara Sieklucka\*  
Faculty of Chemistry, Jagiellonian University, Gronostajowa 2, 30-387 Kraków, Poland

Corresponding authors: simon.chorazy@uj.edu.pl; barbara.sieklucka@uj.edu.pl

|           |                                                                                                                                                                                                                                                                                                                                                                                                                                                   |     |
|-----------|---------------------------------------------------------------------------------------------------------------------------------------------------------------------------------------------------------------------------------------------------------------------------------------------------------------------------------------------------------------------------------------------------------------------------------------------------|-----|
| Fig. S1   | Infrared (IR) absorption spectra of <b>1</b> , <b>2</b> , <b>3</b> , and bpp ligand.                                                                                                                                                                                                                                                                                                                                                              | S4  |
| Fig. S2   | Solid-state UV-vis-NIR absorption spectra of <b>1</b> , <b>2</b> and <b>3</b> .                                                                                                                                                                                                                                                                                                                                                                   | S4  |
| Fig. S3   | Thermogravimetric (TG) curves for <b>1</b> , <b>2</b> , and <b>3</b> .                                                                                                                                                                                                                                                                                                                                                                            | S5  |
| Table S1  | Crystal data and details of the structure refinement for compounds <b>1–3</b> .                                                                                                                                                                                                                                                                                                                                                                   | S6  |
| Fig. S4   | Experimental powder X-ray diffraction (P-XRD) patterns of <b>1–3</b> compared with the respective P-XRD patterns calculated from the structural models obtained within the SC-XRD experiments.                                                                                                                                                                                                                                                    | S7  |
| Fig. S5   | Additional structural views showing the nearly perpendicular arrangement of neighbouring tetrametallic squares within the cyanido-bridged coordination chains of <b>1–3</b> .                                                                                                                                                                                                                                                                     | S8  |
| Fig. S6   | Comparison of the asymmetric units of <b>1–3</b> .                                                                                                                                                                                                                                                                                                                                                                                                | S9  |
| Table S2  | Result of Continuous Shape Measures (CSHM) analysis for $[W^{IV/V}(CN)_8]^{4-/3-}$ complexes in <b>1–3</b> .                                                                                                                                                                                                                                                                                                                                      | S10 |
| Table S3  | Result of Continuous Shape Measures (CSHM) analysis for Co <sup>II</sup> complexes in <b>1–3</b> .                                                                                                                                                                                                                                                                                                                                                | S10 |
| Table S4  | The selected metric parameters for compounds <b>1–3</b> .                                                                                                                                                                                                                                                                                                                                                                                         | S11 |
| Fig. S7   | Arrangement of water molecules and the hydrogen bonds network in <b>1</b> .                                                                                                                                                                                                                                                                                                                                                                       | S12 |
| Fig. S8   | Arrangement of water molecules and the hydrogen-bonds network in <b>2</b> and <b>3</b> .                                                                                                                                                                                                                                                                                                                                                          | S13 |
| Fig. S9   | The visualization of $\pi$ - $\pi$ interactions involving aromatic rings of bpp ligands in <b>1–3</b> .                                                                                                                                                                                                                                                                                                                                           | S13 |
| Fig. S10  | Direct-current ( <i>dc</i> ) magnetic characteristics of <b>1</b> .                                                                                                                                                                                                                                                                                                                                                                               | S14 |
| Fig. S11  | Magnetic-field-dependent alternate-current ( <i>ac</i> ) magnetic characteristics of <b>1</b> at $T = 1.8$ K.                                                                                                                                                                                                                                                                                                                                     | S15 |
| Fig. S12  | Temperature-dependent alternate-current ( <i>ac</i> ) magnetic characteristics of <b>1</b> at $H_{dc} = 1000$ Oe.                                                                                                                                                                                                                                                                                                                                 | S16 |
| Fig. S13  | Temperature dependence of the magnetic relaxation time in <b>1</b> presented with the best-fit curve taking into account three different relaxation pathways with visualized contributions.                                                                                                                                                                                                                                                       | S17 |
| Fig. S14  | Main direct-current ( <i>dc</i> ) magnetic characteristics of <b>2</b> and <b>3</b> .                                                                                                                                                                                                                                                                                                                                                             | S18 |
| Fig. S15  | Field-cooled magnetization curves for <b>2</b> recorded at various <i>dc</i> fields from the 10–7000 Oe range.                                                                                                                                                                                                                                                                                                                                    | S19 |
| Fig. S16  | Field-cooled magnetization curves for <b>3</b> recorded at various <i>dc</i> fields from the 10–5000 Oe range.                                                                                                                                                                                                                                                                                                                                    | S20 |
| Fig. S17  | Field dependences of magnetization gathered for various temperature from the 1.8–11 K range, presented together with the $dM/dH$ versus $H$ plots, for <b>2</b> and <b>3</b> .                                                                                                                                                                                                                                                                    | S21 |
| Fig. S18  | $H$ - $T$ magnetic phase diagrams for <b>2</b> and <b>3</b> with the explanation regarding their construction.                                                                                                                                                                                                                                                                                                                                    | S22 |
| Fig. S19  | Temperature-dependent alternate-current ( <i>ac</i> ) magnetic characteristics of <b>2</b> at $H_{dc} = 0$ Oe.                                                                                                                                                                                                                                                                                                                                    | S23 |
| Fig. S20  | Temperature-dependent alternate-current ( <i>ac</i> ) magnetic characteristics of <b>3</b> at $H_{dc} = 0$ Oe.                                                                                                                                                                                                                                                                                                                                    | S24 |
| Table S5  | Basis sets employed in the <i>ab initio</i> calculations for Co <sup>II</sup> complexes of <b>1</b> , <b>2</b> , and <b>3</b> .                                                                                                                                                                                                                                                                                                                   | S25 |
| Table S6  | The energy splitting of ground Kramers doublets and their pseudo- <i>g</i> -tensors for <b>Co1</b> centres in <b>1</b> .                                                                                                                                                                                                                                                                                                                          | S25 |
| Table S7  | The energy splitting of ground Kramers doublets and their pseudo- <i>g</i> -tensors for <b>Co1A</b> centres in <b>2</b> .                                                                                                                                                                                                                                                                                                                         | S25 |
| Table S8  | The energy splitting of ground Kramers doublets and their pseudo- <i>g</i> -tensors for <b>Co1B</b> centres in <b>2</b> .                                                                                                                                                                                                                                                                                                                         | S26 |
| Table S9  | The energy splitting of ground Kramers doublets and their pseudo- <i>g</i> -tensors for <b>Co1A</b> centres in <b>3</b> .                                                                                                                                                                                                                                                                                                                         | S26 |
| Table S10 | The energy splitting of ground Kramers doublets and their pseudo- <i>g</i> -tensors for <b>Co1B</b> centres in <b>3</b> .                                                                                                                                                                                                                                                                                                                         | S26 |
| Table S11 | <i>Ab initio</i> calculated zero-field splitting parameters and the related <i>g</i> -tensor components for Co(II) complexes of <b>1–3</b> determined for the full spin Hamiltonian for $S = 3/2$ compared with the <i>g</i> -tensor components corresponding to the effective pseudo spin 1/2 Hamiltonian taken directly from the results of the <i>ab initio</i> calculations for the lowest lying Kramers doublet of the $^4T_{1g}$ multiplet, | S27 |
| Fig. S21  | Visualization of four additionally considered magneto-structural models for <b>1</b> (ZC-4, ZR-4, ZC-8, ZR-8).                                                                                                                                                                                                                                                                                                                                    | S28 |

|           |                                                                                                                                                                                                                                                                                                                                          |     |
|-----------|------------------------------------------------------------------------------------------------------------------------------------------------------------------------------------------------------------------------------------------------------------------------------------------------------------------------------------------|-----|
| Fig. S22  | Comparison of the experimental $\chi_M T(T)$ curve for <b>1</b> with the $\chi_M T(T)$ curves calculated for isolated Co1 centres from the <i>ab initio</i> calculations and obtained from modelling the magnetic properties using the magneto-structural models of ZC-4, ZR-4, ZC-8, ZR-8, ZC-4(4st.), and ZC-4(4st.).                  | S29 |
| Fig. S23  | Comparison of the experimental $M(H)$ curve for <b>1</b> at various low temperatures with the respective $M(H)$ curves calculated for isolated Co1 centres from the <i>ab initio</i> calculations and obtained from modelling the magnetic properties using the ZC-12, ZR-12, ZC-4, ZR-4, ZC-8, ZR-8, ZC-4(4st.), and ZR-4(4st.) models. | S30 |
| Fig. S24  | The scheme of exchange states for <b>1</b> calculated by employing the <i>ab initio</i> calculations and two different magneto-structural models of ZC-12 and ZR-12.                                                                                                                                                                     | S31 |
| Fig. S25  | The dependence between the energy of the pairs of exchange states and the energy gaps determined for <b>1</b> using the <i>ab initio</i> calculations and two magneto-structural models of ZC-12 and ZR-12.                                                                                                                              | S32 |
| Table S12 | The lists of 32 lowest lying exchange states (16 pseudo-doublets) and the respective energy gaps obtained for <b>1</b> using the <i>ab initio</i> calculations and two magneto-structural models of ZC-12 and ZR-12.                                                                                                                     | S33 |
| Fig. S26  | The scheme of exchange states for <b>1</b> calculated by employing the <i>ab initio</i> calculations and four different magneto-structural models of ZC-4, ZR-4, ZC-4(4st.), and ZR-4(4st.).                                                                                                                                             | S34 |
| Fig. S27  | The scheme of exchange states for <b>1</b> calculated by employing the <i>ab initio</i> calculations and two different magneto-structural models of ZC-8 and ZR-8.                                                                                                                                                                       | S35 |
| Fig. S28  | The dependence between the energy of the pairs of exchange states and the energy gaps determined for <b>1</b> using the <i>ab initio</i> calculations and two magneto-structural models of ZC-4 and ZR-4.                                                                                                                                | S36 |
| Table S13 | The lists of 16 lowest lying exchange states (8 pseudo-doublets) and the respective energy gaps obtained for <b>1</b> using the <i>ab initio</i> calculations and two magneto-structural models of ZC-4 and ZR-4.                                                                                                                        | S37 |
| Fig. S29  | The dependence between the energy of the pairs of exchange states and the energy gaps determined for <b>1</b> using the <i>ab initio</i> calculations and two magneto-structural models of ZC-8 and ZR-8.                                                                                                                                | S38 |
| Table S14 | The lists of 32 lowest lying exchange states (16 pseudo-doublets) and the respective energy gaps obtained for <b>1</b> using the <i>ab initio</i> calculations and two magneto-structural models of ZC-8 and ZR-8.                                                                                                                       | S39 |
| Fig. S30  | The dependence between the energy of the pairs of exchange states and the energy gaps determined for <b>1</b> using the <i>ab initio</i> calculations and two magneto-structural models of ZC-4(4st.) and ZR-4(4st.).                                                                                                                    | S40 |
| Table S15 | The lists of 32 lowest lying exchange states (16 pseudo-doublets) and the respective energy gaps obtained for <b>1</b> using the <i>ab initio</i> calculations and two magneto-structural models of ZC-4(4st.) and ZR-4(4st.).                                                                                                           | S41 |
| Fig. S31  | Comparison of the experimental <i>dc</i> magnetic data for <b>2</b> and <b>3</b> with the respective magnetic curves calculated based on the results of the <i>ab initio</i> calculations performed for isolated Co centres.                                                                                                             | S42 |
| Fig. S32  | Possible arrangements of H <sub>2</sub> O and Cl <sup>-</sup> ligands attached to the Co centres in <b>2</b> together with the labels of the resulting magneto-structural models that could be considered for the modelling of the magnetic properties.                                                                                  | S43 |
| Fig. S33  | Visualization of the ABBA-type magneto-structural models for modelling the magnetic properties of <b>2</b> .                                                                                                                                                                                                                             | S44 |
| Fig. S34  | Visualization of the ABAB-type magneto-structural models for modelling the magnetic properties of <b>2</b> .                                                                                                                                                                                                                             | S45 |
| Fig. S35  | Visualization of the AABB-type magneto-structural models for modelling the magnetic properties of <b>2</b> .                                                                                                                                                                                                                             | S46 |
| Fig. S36  | Scheme of the (AA+BB)-type (part 1) magneto-structural models for modelling the magnetic properties of <b>2</b> .                                                                                                                                                                                                                        | S47 |
| Fig. S37  | Scheme of the (AA+BB)-type (part 2) magneto-structural models for modelling the magnetic properties of <b>2</b> .                                                                                                                                                                                                                        | S48 |
| Fig. S38  | The alignment of pseudo- <i>g</i> -tensor components in the chains of <b>2</b> within the tested magneto-structural models of ABBA, ABAB, and AA+BB.                                                                                                                                                                                     | S49 |
| Fig. S39  | Comparison of the experimental temperature dependences of the magnetic susceptibility–temperature product for <b>2</b> with the respective magnetic curves calculated using the results of the <i>ab initio</i> calculations and various magneto-structural models.                                                                      | S50 |
| Fig. S40  | Comparison of the experimental field dependences of magnetization at 25, 30, and 35 K for <b>2</b> with magnetic curves calculated using the results of the <i>ab initio</i> calculations and various magneto-structural models.                                                                                                         | S51 |
| Fig. S41  | The scheme of exchange states for <b>2</b> calculated by employing the <i>ab initio</i> calculations and six different magneto-structural models of C6-ABBA, C6-ABBA(4st.), C12-ABBA, R6-ABBA, R6-ABBA(4st.), and R12-ABBA.                                                                                                              | S52 |
| Fig. S42  | The scheme of exchange states for <b>2</b> calculated by employing the <i>ab initio</i> calculations and six different magneto-structural models of C6-ABAB, C6-ABAB(4st.), C12-ABAB, R6-ABAB, R6-ABAB(4st.), and R12-ABAB.                                                                                                              | S53 |
| Fig. S43  | The scheme of exchange states for <b>2</b> calculated by employing the <i>ab initio</i> calculations and six different magneto-structural models of C6-AABB, C6-AABB(4st.), C12-AABB, R6-AABB, R6-AABB(4st.), and R12-AABB.                                                                                                              | S54 |
| Fig. S44  | The scheme of exchange states for <b>2</b> calculated by employing the <i>ab initio</i> calculations and six different magneto-structural models of C6-AA+BB (part 1), C6-AA+BB(4st.) (part 1), C12-AA+BB (part 1), R6-AA+BB                                                                                                             | S55 |

|           |                                                                                                                                                                                                                                                                                                                                                                       |     |
|-----------|-----------------------------------------------------------------------------------------------------------------------------------------------------------------------------------------------------------------------------------------------------------------------------------------------------------------------------------------------------------------------|-----|
|           | (part 1), R6-AA+BB(4st.) (part 1), and R12-AA+BB (part 1).                                                                                                                                                                                                                                                                                                            |     |
| Fig. S45  | The scheme of exchange states for <b>2</b> calculated by employing the <i>ab initio</i> calculations and six different magneto-structural models of C6-AA+BB (part 2), C6-AA+BB(4st.) (part 2), C12-AA+BB (part 2), R6-AA+BB (part 12), R6-AA+BB(4st.) (part 2), and R12-AA+BB (part 2).                                                                              | S56 |
| Fig. S46  | The dependence between the energy of the pairs of exchange states and the energy gaps determined for <b>2</b> using the <i>ab initio</i> calculations and two selected magneto-structural models of C6-AABB and C6-AABB(4st.).                                                                                                                                        | S57 |
| Fig. S47  | The dependence between the energy of the pairs of exchange states and the energy gaps determined for <b>2</b> using the <i>ab initio</i> calculations and the magneto-structural models of C6-AA+BB and C6-AA+BB(4st.) (part 1).                                                                                                                                      | S58 |
| Fig. S48  | The dependence between the energy of the pairs of exchange states and the energy gaps determined for <b>2</b> using the <i>ab initio</i> calculations and the magneto-structural models of C6-AA+BB and C6-AA+BB(4st.) (part 2).                                                                                                                                      | S59 |
| Table S16 | The lists of 16 lowest lying exchange states (8 pseudo-doublets) and the respective energy gaps obtained for <b>2</b> using the <i>ab initio</i> calculations and two magneto-structural models of C6/C12-ABBA.                                                                                                                                                       | S60 |
| Table S17 | The lists of 16 lowest lying exchange states (8 pseudo-doublets) and the respective energy gaps obtained for <b>2</b> using the <i>ab initio</i> calculations and two magneto-structural models of R6/R12-ABBA.                                                                                                                                                       | S61 |
| Table S18 | The lists of 16 lowest lying exchange states (8 pseudo-doublets) and the respective energy gaps obtained for <b>2</b> using the <i>ab initio</i> calculations and two magneto-structural models of C6/C12-ABAB.                                                                                                                                                       | S62 |
| Table S19 | The lists of 16 lowest lying exchange states (8 pseudo-doublets) and the respective energy gaps obtained for <b>2</b> using the <i>ab initio</i> calculations and two magneto-structural models of R6/R12-ABAB.                                                                                                                                                       | S63 |
| Table S20 | The lists of 16 lowest lying exchange states (8 pseudo-doublets) and the respective energy gaps obtained for <b>2</b> using the <i>ab initio</i> calculations and two magneto-structural models of C6/C12-AABB.                                                                                                                                                       | S64 |
| Table S21 | The lists of 16 lowest lying exchange states (8 pseudo-doublets) and the respective energy gaps obtained for <b>2</b> using the <i>ab initio</i> calculations and two magneto-structural models of R6/R12-AABB.                                                                                                                                                       | S65 |
| Table S22 | The lists of 16 lowest lying exchange states (8 pseudo-doublets) and the respective energy gaps obtained for <b>2</b> using the <i>ab initio</i> calculations and two magneto-structural models of C6/C12-AA+BB (part 1).                                                                                                                                             | S66 |
| Table S23 | The lists of 16 lowest lying exchange states (8 pseudo-doublets) and the respective energy gaps obtained for <b>2</b> using the <i>ab initio</i> calculations and two magneto-structural models of R6/R12-AA+BB (part 1).                                                                                                                                             | S67 |
| Table S24 | The lists of 16 lowest lying exchange states (8 pseudo-doublets) and the respective energy gaps obtained for <b>2</b> using the <i>ab initio</i> calculations and two magneto-structural models of C6/C12-AA+BB (part 2).                                                                                                                                             | S68 |
| Table S25 | The lists of 16 lowest lying exchange states (8 pseudo-doublets) and the respective energy gaps obtained for <b>2</b> using the <i>ab initio</i> calculations and two magneto-structural models of R6/R12-AA+BB (part 2).                                                                                                                                             | S69 |
| Fig. S49  | Experimental temperature dependence of the $\chi_M T$ for <b>2</b> compared with the $\chi_M T(T)$ plots simulated using the results of the <i>ab initio</i> calculations combined with the fitting of the exchange coupling employing the magneto-structural model of C6-AABB with three different coupling constants $J$ of 24.2, 25.1, and 25.6 cm <sup>-1</sup> . | S70 |
| Fig. S50  | Experimental temperature dependence of the $\chi_M T$ product under $H_{dc} = 1000$ Oe for <b>3</b> compared with the $\chi_M T(T)$ curves calculated using the results of the <i>ab initio</i> calculations combined with the simulations of magnetic exchange employing C6-AABB and C6-AABB(4st.) models.                                                           | S71 |
| Fig. S51  | The scheme of exchange states for <b>3</b> calculated by employing the <i>ab initio</i> calculations and two selected magneto-structural models of C6-AABB and C6-AABB(4st.).                                                                                                                                                                                         | S71 |
| Fig. S52  | The dependence between the energy of the pairs of exchange states and the energy gaps determined for <b>3</b> using the <i>ab initio</i> calculations and two selected magneto-structural models of C6-AABB and C6-AABB(4st.).                                                                                                                                        | S72 |
| Table S26 | The lists of 16 lowest lying exchange states (8 pseudo-doublets) and the respective energy gaps obtained for <b>3</b> using the <i>ab initio</i> calculations and two magneto-structural models of C6-AABB and C6-AABB(4st.).                                                                                                                                         | S73 |
| Fig. S53  | Comparison of the representative structural fragments of <b>2</b> and <b>3</b> with other reported cyanido-bridged Co <sup>II</sup> -[W <sup>V</sup> (CN) <sub>8</sub> ] <sup>3-</sup> chains.                                                                                                                                                                        | S74 |
| Table S27 | Comparison of structural features and magnetic properties of <b>2</b> and <b>3</b> with other reported Co <sup>II</sup> -[W <sup>V</sup> (CN) <sub>8</sub> ] <sup>3-</sup> chains.                                                                                                                                                                                    | S75 |

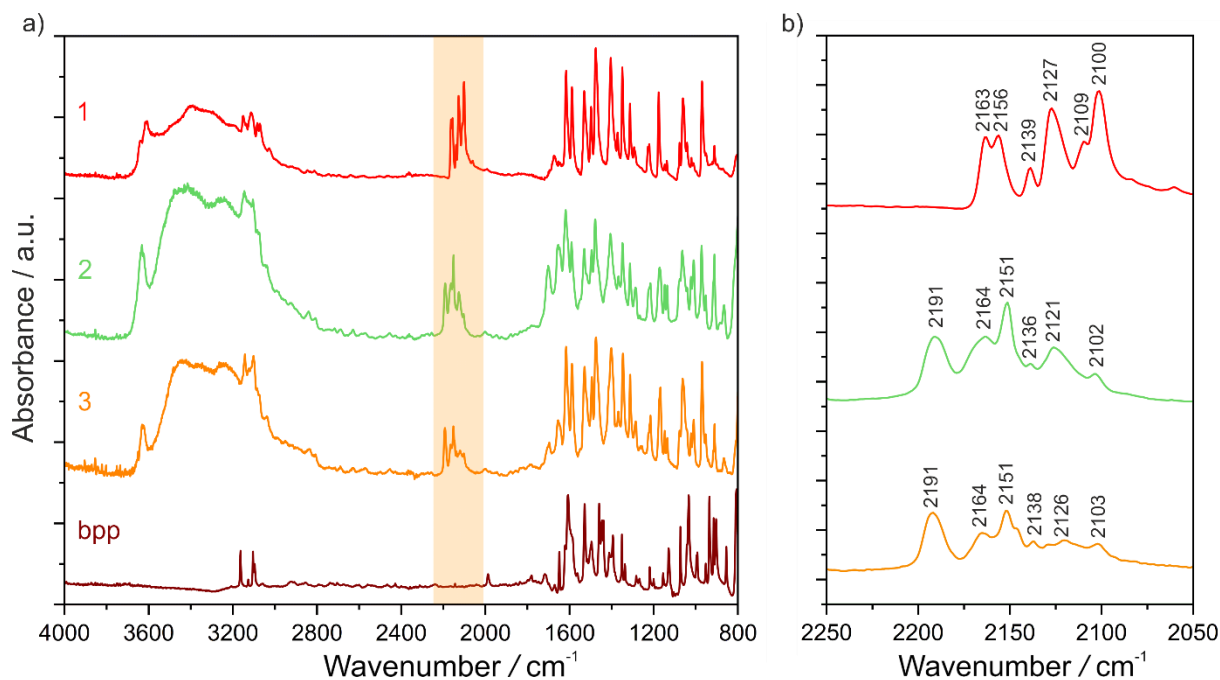

**Fig. S1** Infrared (IR) absorption spectra of **1–3** and bpp ligand recorded in the 4000–800  $\text{cm}^{-1}$  range (a) together with the enlargement of the 2250–2050  $\text{cm}^{-1}$  region representing the absorption bands related to the stretching vibrations of cyanido ligands (b).

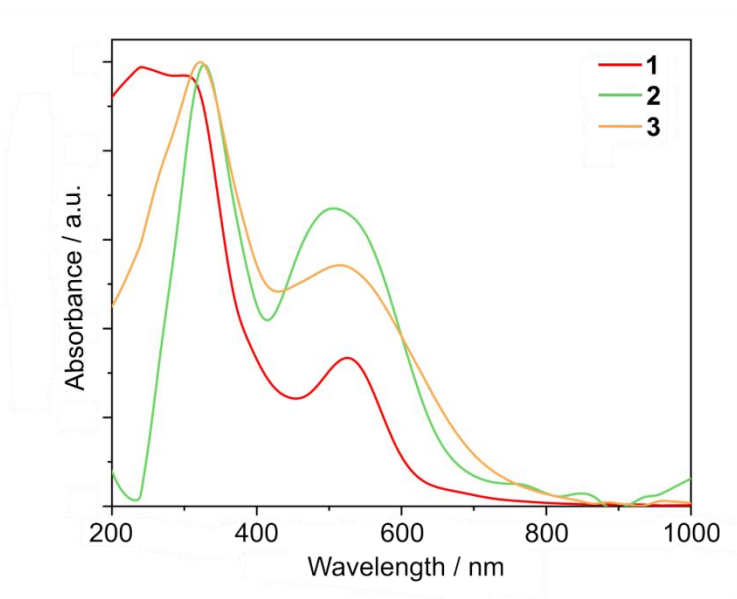

**Fig. S2** Solid-state UV-vis-NIR absorption spectra for **1–3** measured in the 200–1000 nm range. Absorption bands of **2** and **3** in the 400–600 nm region are related to the sum of d-d electronic transitions within  $\text{Co}^{\text{II}}$  centres and electronic transitions of the  $\text{W}^{\text{V}}\text{--Co}^{\text{II}}$  metal-to-metal charge transfer (MMCT) character. In **1**, the MMCT transitions do not occur, thus the absorption band in the visible region is weaker and can be ascribed exclusively to the d-d electronic transitions of  $\text{Co}^{\text{II}}$  centres.



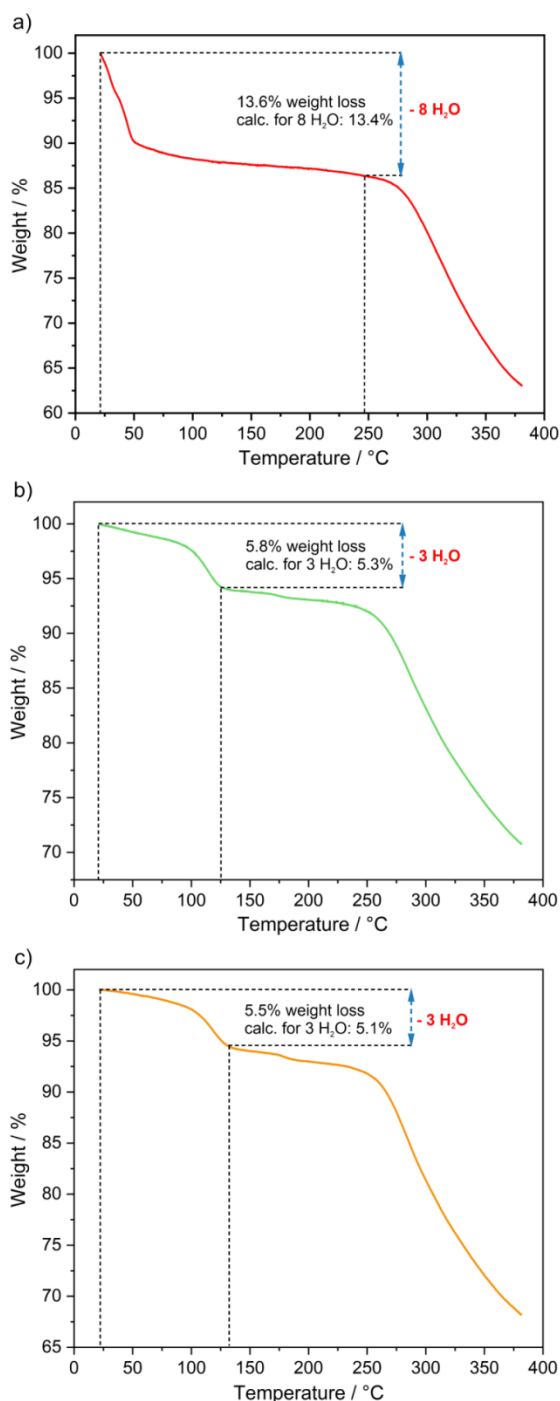

**Fig. S3** Thermogravimetric (TG) curves for **1** (a), **2** (b), and **3** (c) obtained from measurements carried out under a nitrogen atmosphere in the 22–375 °C range. The weight losses indicating the removal of water molecules were depicted on the graph.

**Comment to Fig. S3:**

Upon heating of compound **1** from room temperature to ca. 50 °C, the sharp decrease of the sample weight is observed. This is due to the relatively easy removal of the most of existing water molecules of crystallization. However, further heating up to ca. 245 °C leads to the additional, gradual decrease of the sample mass. It can be ascribed to the removal of stronger bonded coordinated water molecules. The combined weight loss from room temperature to ca. 245 °C suits well the value calculated for the removal of all water molecules existing in **1**. Heating to temperatures above ca. 250 °C leads to the dramatic decrease of the sample mass which is presumably connected with the removal of the part of cyanido as well as organic ligands, and the resulting decomposition of the compound.

In the case of compounds **2** and **3**, upon heating from room temperature to 100 °C, the weaker gradual decrease of the sample weights is observed, followed by the sharp decrease of the sample masses in the 100–125 °C region. It can be ascribed to the removal of both crystallization and coordinated water molecules. Upon further heating, a rather small decrease of the sample mass is observed up to ca. 240 °C, after that a large decrease of the sample mass was detected. It can be presumably connected with the removal of the part of cyanido as well as organic ligands, and the resulting decomposition of the respective compound. The related weight losses ascribable to the removal of water molecules are in good agreement with the calculated ones.

**Table S1** Crystal data and details of the structure refinement for compounds **1–3**.

|                                                | <b>1</b>                                                                                                        | <b>2</b>                                                                                                        | <b>3</b>                                                                                                        |
|------------------------------------------------|-----------------------------------------------------------------------------------------------------------------|-----------------------------------------------------------------------------------------------------------------|-----------------------------------------------------------------------------------------------------------------|
| CCDC deposition no.                            | 2083967                                                                                                         | 2083969                                                                                                         | 2083968                                                                                                         |
| temperature / K                                | 100(2)                                                                                                          | 100(2)                                                                                                          | 100(2)                                                                                                          |
| formula                                        | Co <sub>2</sub> W <sub>1</sub> C <sub>30</sub> H <sub>34</sub> N <sub>18</sub> O <sub>8</sub>                   | Co <sub>2</sub> W <sub>1</sub> Cl <sub>1</sub> C <sub>30</sub> H <sub>20</sub> N <sub>18</sub> O <sub>3</sub>   | Co <sub>2</sub> W <sub>1</sub> Br <sub>1</sub> C <sub>30</sub> H <sub>20</sub> N <sub>18</sub> O <sub>3</sub>   |
| formula weight / g·mol <sup>-1</sup>           | 1076.46                                                                                                         | 1017.8                                                                                                          | 1062.26                                                                                                         |
| radiation                                      | Mo Kα<br>(λ = 0.71073)                                                                                          | Mo Kα<br>(λ = 0.71073)                                                                                          | Mo Kα<br>(λ = 0.71073)                                                                                          |
| crystal system                                 | monoclinic                                                                                                      | monoclinic                                                                                                      | monoclinic                                                                                                      |
| space group                                    | C2/c                                                                                                            | C2/c                                                                                                            | C2/c                                                                                                            |
| <i>a</i> [Å]                                   | 23.0143(13)                                                                                                     | 23.1568(13)                                                                                                     | 22.9910(15)                                                                                                     |
| <i>b</i> [Å]                                   | 12.8994(7)                                                                                                      | 12.8536(7)                                                                                                      | 12.8877(8)                                                                                                      |
| <i>c</i> [Å]                                   | 13.2566(7)                                                                                                      | 13.3618(7)                                                                                                      | 13.3285(9)                                                                                                      |
| β [°]                                          | 106.340(2)                                                                                                      | 109.9440(10)                                                                                                    | 108.6080(10)                                                                                                    |
| volume [Å <sup>3</sup> ]                       | 3776.5(4)                                                                                                       | 3738.6(4)                                                                                                       | 3742.8(4)                                                                                                       |
| <i>Z</i>                                       | 4                                                                                                               | 4                                                                                                               | 4                                                                                                               |
| ρ <sub>calc</sub> / g·cm <sup>-3</sup>         | 1.893                                                                                                           | 1.808                                                                                                           | 1.885                                                                                                           |
| absorption coefficient / cm <sup>-1</sup>      | 3.982                                                                                                           | 4.077                                                                                                           | 5.069                                                                                                           |
| <i>F</i> (000)                                 | 2128                                                                                                            | 1980                                                                                                            | 2052                                                                                                            |
| crystal shape                                  | plate                                                                                                           | block                                                                                                           | block                                                                                                           |
| crystal colour                                 | violet                                                                                                          | red                                                                                                             | red                                                                                                             |
| crystal size / mm x mm x mm                    | 0.45 x 0.1 x 0.05                                                                                               | 0.42 x 0.17 x 0.14                                                                                              | 0.28 x 0.19 x 0.15                                                                                              |
| θ range / deg                                  | 2.596 - 25.023                                                                                                  | 3.144 - 26.728                                                                                                  | 2.633 - 27.485                                                                                                  |
| limiting indices                               | -27 < <i>h</i> < 27<br>-15 < <i>k</i> < 15<br>-15 < <i>l</i> < 15                                               | -29 < <i>h</i> < 29<br>-16 < <i>k</i> < 14<br>-15 < <i>l</i> < 16                                               | -28 < <i>h</i> < 29<br>-15 < <i>k</i> < 16<br>-17 < <i>l</i> < 17                                               |
| reflections collected                          | 15497                                                                                                           | 15497                                                                                                           | 15497                                                                                                           |
| unique reflections                             | 3325                                                                                                            | 3969                                                                                                            | 4298                                                                                                            |
| <i>R</i> <sub>int</sub>                        | 0.0466                                                                                                          | 0.0259                                                                                                          | 0.0301                                                                                                          |
| completeness / %                               | 99.5                                                                                                            | 99.8                                                                                                            | 99.9                                                                                                            |
| data/restraints/parameters                     | 3325/15/318                                                                                                     | 3969/30/318                                                                                                     | 4298/17/318                                                                                                     |
| GOF on <i>F</i> <sup>2</sup>                   | 1.049                                                                                                           | 1.150                                                                                                           | 1.056                                                                                                           |
| final <i>R</i> indices                         | <i>R</i> <sub>1</sub> = 0.0310<br>[ <i>I</i> > 2σ( <i>I</i> )]<br><i>wR</i> <sub>2</sub> = 0.0801<br>(all data) | <i>R</i> <sub>1</sub> = 0.0326<br>[ <i>I</i> > 2σ( <i>I</i> )]<br><i>wR</i> <sub>2</sub> = 0.0842<br>(all data) | <i>R</i> <sub>1</sub> = 0.0305<br>[ <i>I</i> > 2σ( <i>I</i> )]<br><i>wR</i> <sub>2</sub> = 0.0680<br>(all data) |
| largest diff. peak/hole [e · Å <sup>-3</sup> ] | 1.606/−0.851                                                                                                    | 1.885/−1.498                                                                                                    | 2.186/−1.951                                                                                                    |

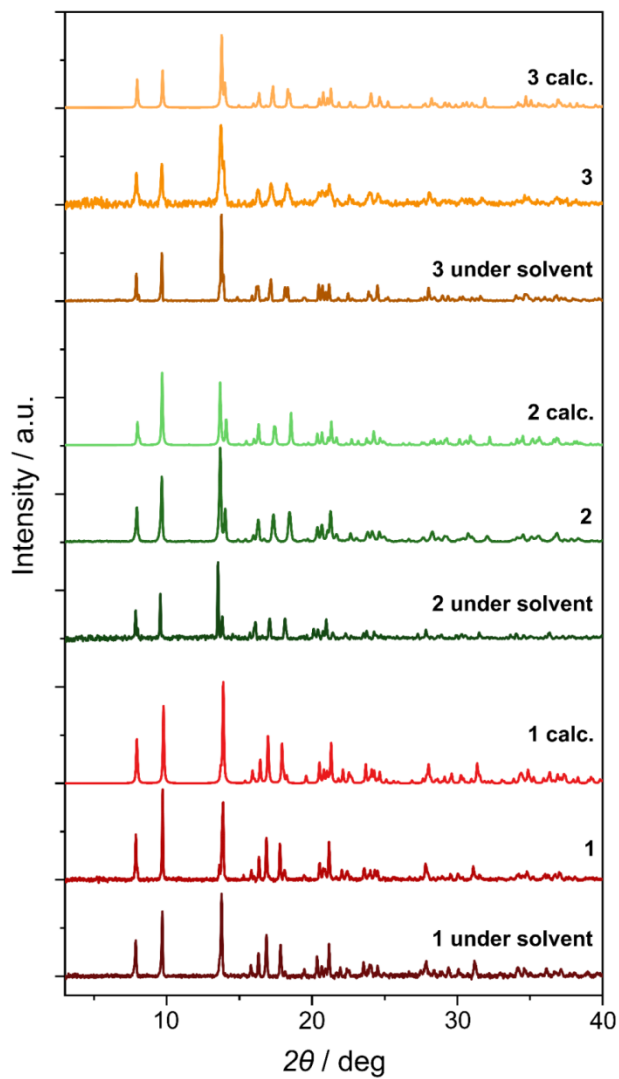

**Fig. S4** Comparison of the experimental powder X-ray diffraction (P-XRD) patterns for bulk samples of **1–3** (measured both under solvent as well as after drying them on the air) with the respective P-XRD patterns calculated from the structural models obtained within the single-crystal X-ray diffraction (SC-XRD) experiment.

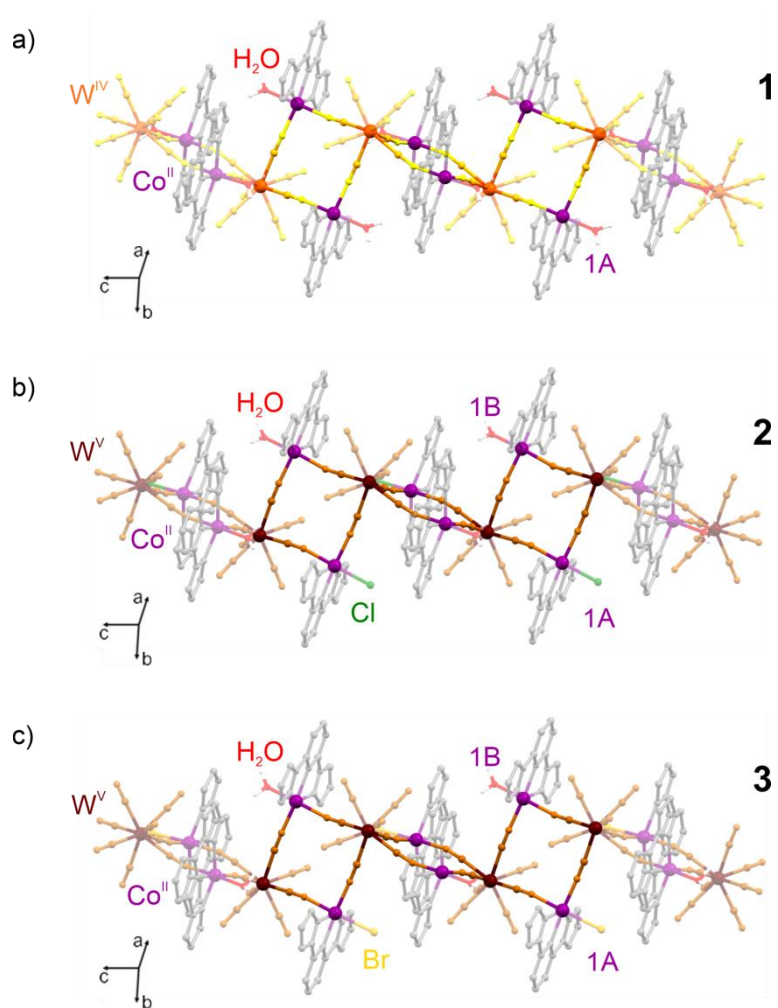

**Fig. S5** Additional structural views showing the nearly perpendicular arrangement of neighbouring tetrametallic squares within the cyanido-bridged coordination chains of **1** (a), **2** (b), and **3** (c).

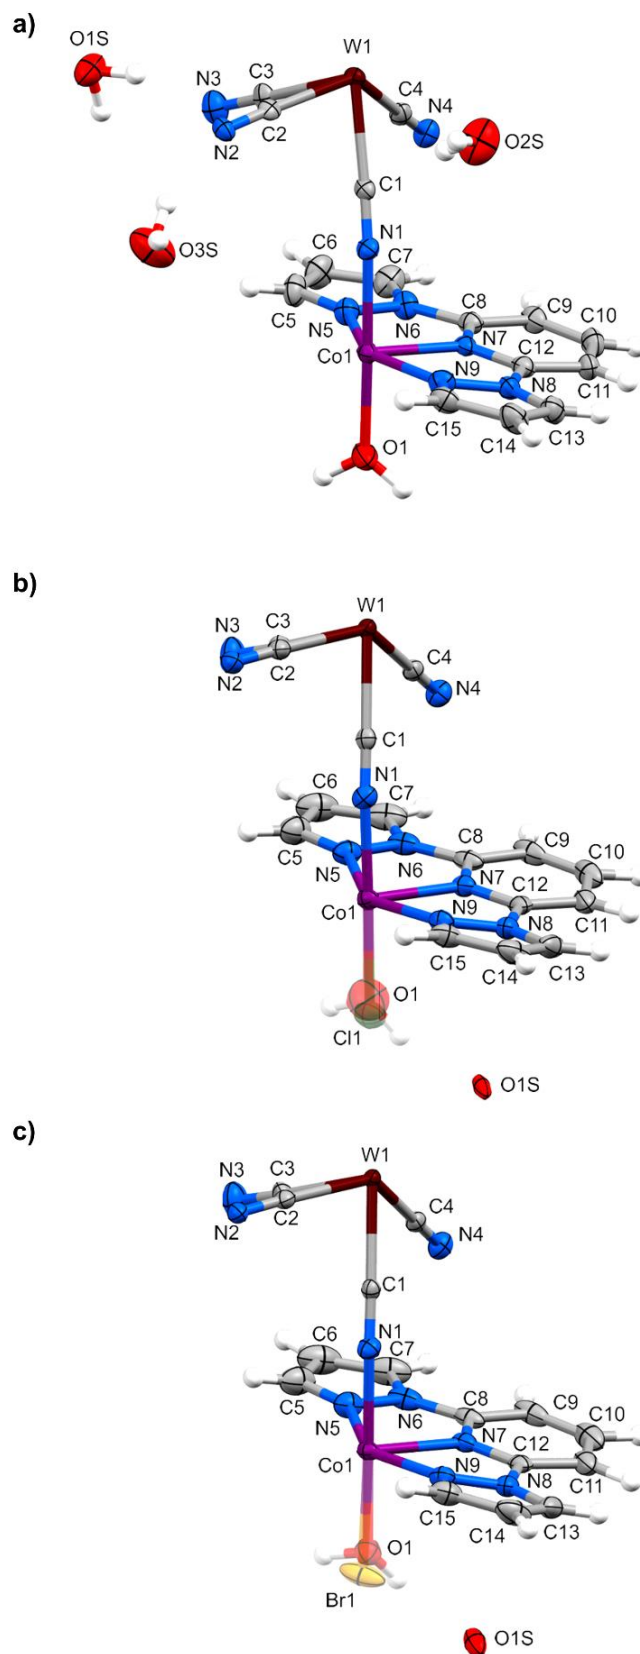

**Fig. S6** Comparison of asymmetric units of **1** (a), **2** (b), and **3** (c) presented with the labelling scheme for all non-hydrogen atoms. Thermal ellipsoids are presented at the 50% probability level. Hydrogen atoms were shown as fixed-sized spheres with a 0.2 Å radius. The coordination sphere of Co(II) complexes in **2** and **3** are completed by halogen (Br, Cl) or aqua ligands, each of them revealing the 0.5 occupation.

**Table S2** The results of the Continuous Shape Measures (CShM) analysis for eight-coordinated  $[W^{IV/V}(CN)_8]^{3-/4-}$  anions present in the crystal structures of **1–3**. The  $S_{\text{geometry}}$  value of 0 indicates an ideal reference geometry, the higher values represent the deviation from the idealized polyhedron of **BTPR** – bicapped trigonal prism, **SAPR** – square antiprism, and **TDD** – triangular dodecahedron.<sup>S1,S2</sup>

|                       | $S_{\text{BTPR}}$ | $S_{\text{SAPR}}$ | $S_{\text{TDD}}$ |
|-----------------------|-------------------|-------------------|------------------|
| <b>1</b> ( $W^{IV}$ ) | 1.799             | 0.893             | 0.831            |
| <b>2</b> ( $W^V$ )    | 1.813             | 0.481             | 1.370            |
| <b>3</b> ( $W^V$ )    | 1.778             | 0.688             | 1.067            |

**Table S3.** The results of the Continuous Shape Measures (CShM) analysis for six-coordinated  $Co^{II}$  complexes present in the structures of **1–3**. The  $S_{\text{geometry}}$  value of 0 indicates an ideal reference geometry, the higher values represent the deviation from the idealized polyhedron of **PPY** – pentagonal pyramid, **OC** – octahedron, and **TPR** – trigonal prism.<sup>S1,S2</sup> In the structures of **2** and **3**, coordination spheres of  $Co^{II}$  centres including aqua (**A**) or halogen ( $Cl^-$  for **2** and  $Br^-$  for **3**) ligands (**B**) are considered.

|                               | $S_{\text{PPY}}$ | $S_{\text{OC}}$ | $S_{\text{TPR}}$ |
|-------------------------------|------------------|-----------------|------------------|
| <b>1</b> , Co1 ( $Co^{II}$ )  | 22.394           | 1.995           | 10.979           |
| <b>2</b> , Co1A ( $Co^{II}$ ) | 21.316           | 2.213           | 11.188           |
| <b>2</b> , Co1B ( $Co^{II}$ ) | 21.564           | 2.308           | 11.715           |
| <b>3</b> , Co1A ( $Co^{II}$ ) | 21.409           | 2.124           | 11.379           |
| <b>3</b> , Co1B ( $Co^{II}$ ) | 21.618           | 2.649           | 11.801           |

#### References to Tables S2–S3:

S1 M. Llunell, D. Casanova, J. Cirera, J. Bofill, P. Alemany, S. Alvarez, M. Pinsky and D. Avnir, *SHAPE v. 2.1. Program for the Calculation of Continuous Shape Measures of Polygonal and Polyhedral Molecular Fragments*, University of Barcelona, Barcelona, Spain, 2013.

S2 D. Casanova, J. Cirera, M. Llunell, P. Alemany, D. Avnir and S. Alvarez, *J. Am. Chem. Soc.*, 2004, **126**, 1755.

**Table S4** The selected metric parameters for compounds **1–3**, presented with the related visualization of the structural fragment.

|               | <b>1</b>   | <b>2</b>   | <b>3</b>   |
|---------------|------------|------------|------------|
| Co1-N1 / Å    | 2.109(4)   | 2.154(4)   | 2.145(3)   |
| Co1-N2 / Å    | 2.051(4)   | 2.053(4)   | 2.049(3)   |
| Co1-N5 / Å    | 2.137(5)   | 2.131(4)   | 2.121(4)   |
| Co1-N7 / Å    | 2.098(4)   | 2.103(4)   | 2.101(3)   |
| Co1-N9 / Å    | 2.147(4)   | 2.129(4)   | 2.130(4)   |
| Co1-O1 / Å    | 2.136(4)   | 2.066(12)  | 2.062(8)   |
| Co1-Cl1 / Å   | -          | 2.442(4)   | -          |
| Co1-Br1 / Å   | -          | -          | 2.6098(12) |
| Co1-N1-C1 / ° | 160.2(4)   | 159.8(4)   | 159.9(3)   |
| Co1-N2-C2 / ° | 170.7(4)   | 172.7(4)   | 172.5(3)   |
| N5-Co1-N7 / ° | 74.91(17)  | 74.78(17)  | 74.70(15)  |
| N5-Co1-N9 / ° | 149.00(17) | 147.61(17) | 147.69(15) |
| N7-Co1-N9 / ° | 74.38(16)  | 74.38(16)  | 74.17(14)  |
| W1-C1 / Å     | 2.160(5)   | 2.167(5)   | 2.163(4)   |
| W1-C2 / Å     | 2.173(5)   | 2.174(5)   | 2.169(4)   |
| W1-C3 / Å     | 2.142(5)   | 2.163(5)   | 2.158(4)   |
| W1-C4 / Å     | 2.169(5)   | 2.160(5)   | 2.158(4)   |
| W1-C1-N1 / °  | 176.9(4)   | 174.7(4)   | 174.8(3)   |
| W1-C2-N2 / °  | 177.0(4)   | 176.6(4)   | 176.5(3)   |
| W1-C3-N3 / °  | 179.2(5)   | 177.5(5)   | 177.6(4)   |
| W1-C4-N4 / °  | 178.4(4)   | 178.4(4)   | 178.0(3)   |

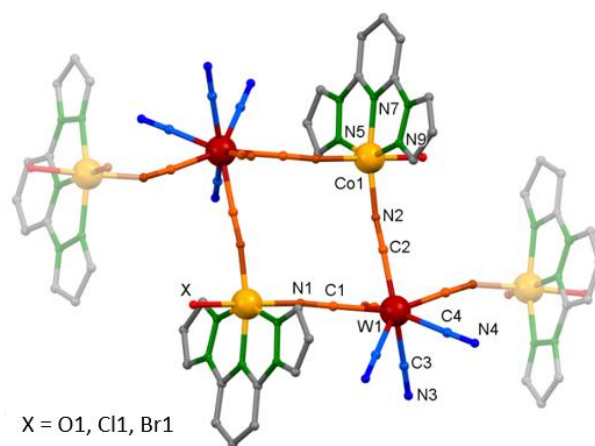

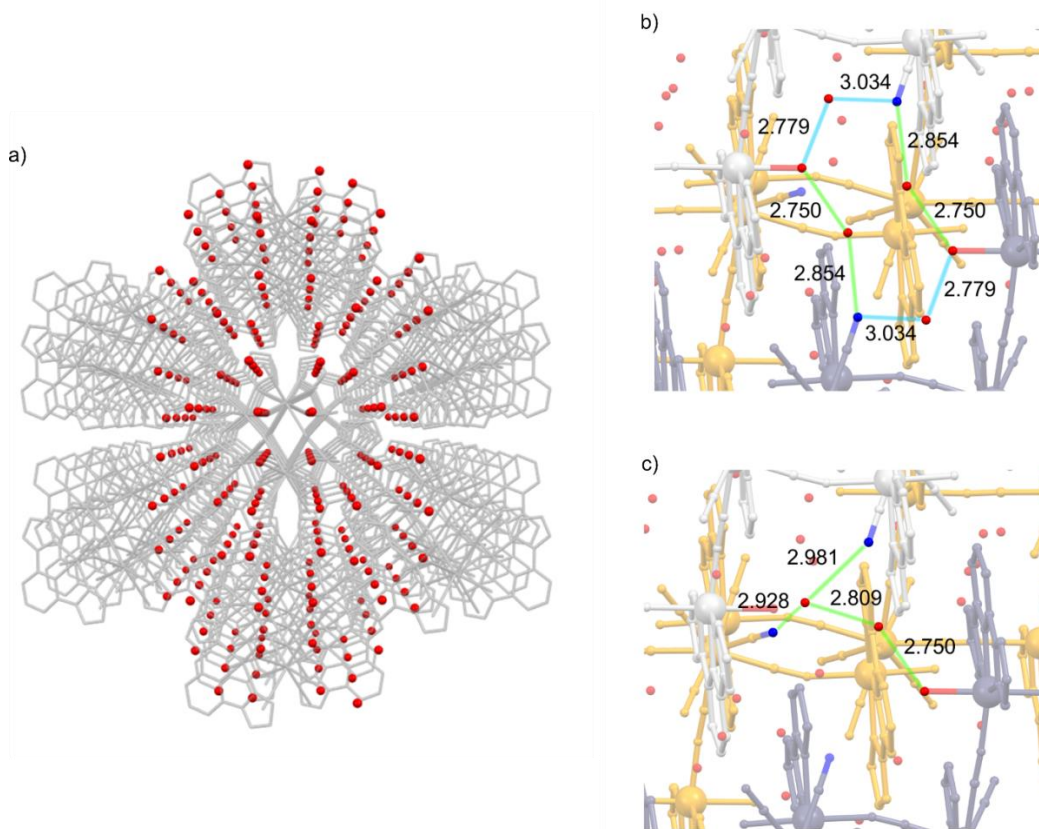

**Fig. S7** Arrangement of water of crystallization within the crystal structure of **1** presented along *c* crystallographic axis (a) and two representative structural fragments showing the existing hydrogen bonding network (b and c). In the visualization of hydrogen bonding network, the O atoms of water molecules are shown as red balls, the N-atoms of cyanido ligands as deep blue balls, while interchain and intrachain H-bonds are represented by green and light blue colours, respectively. The N–O or O–O distances representing the hydrogen bonds were depicted in the figure.



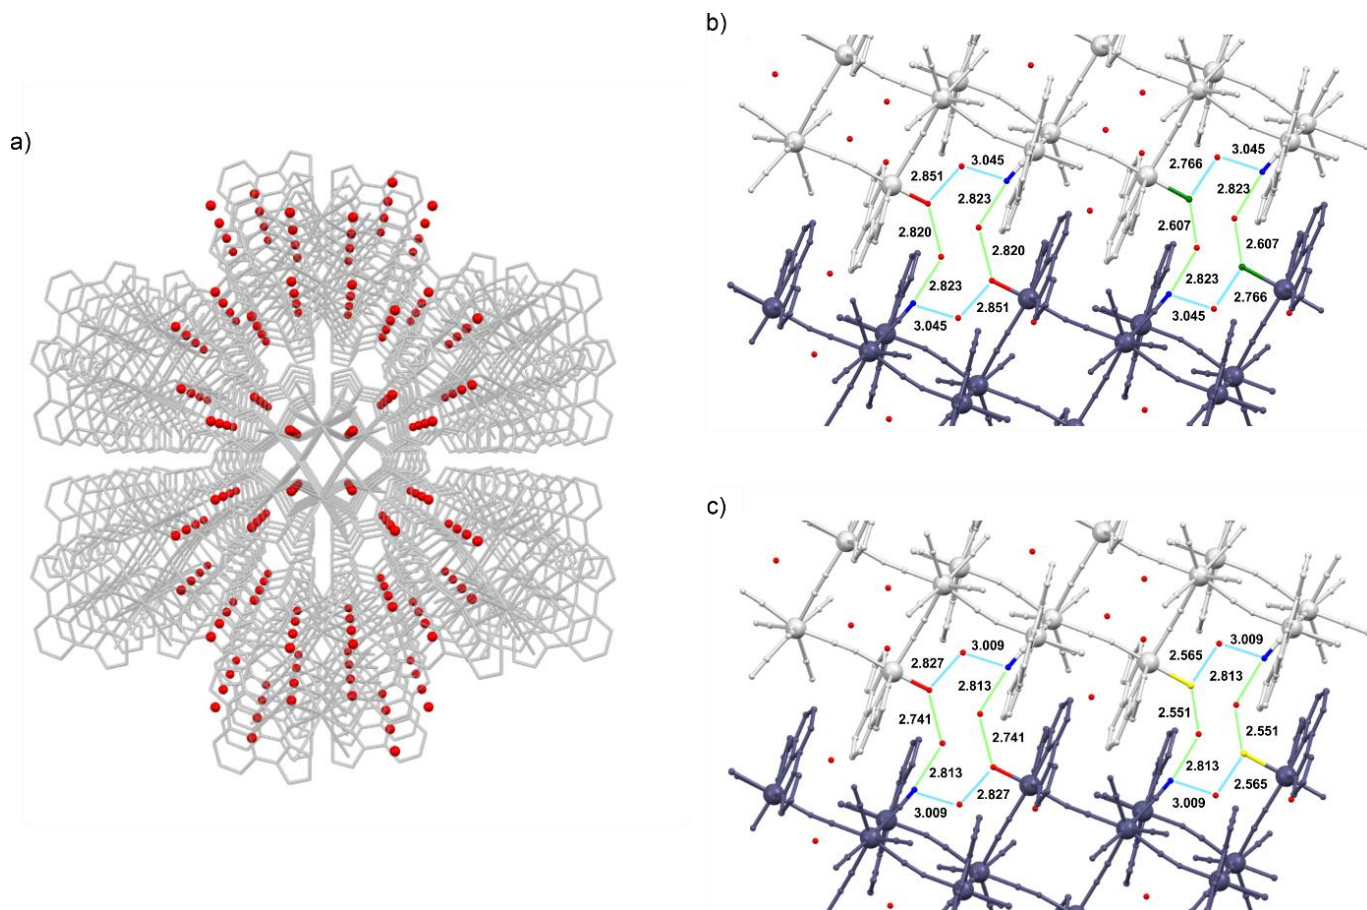

**Fig. S8** Arrangement of water of crystallization within the crystal structure of **1** presented along *c* crystallographic axis (a) and two representative structural fragments showing the existing hydrogen bonding network (b and c). In the visualization of hydrogen bonding network, the O atoms of water molecules are shown as red balls, the N-atoms of cyanido ligands as deep blue balls, the Cl-atoms as dark green balls, the Br-atoms as yellow balls, while interchain and intrachain H-bonds are represented by green and light blue colours, respectively. The N–O/O–O/O–Cl/O–Br distances representing the hydrogen bonds were depicted in the figure.

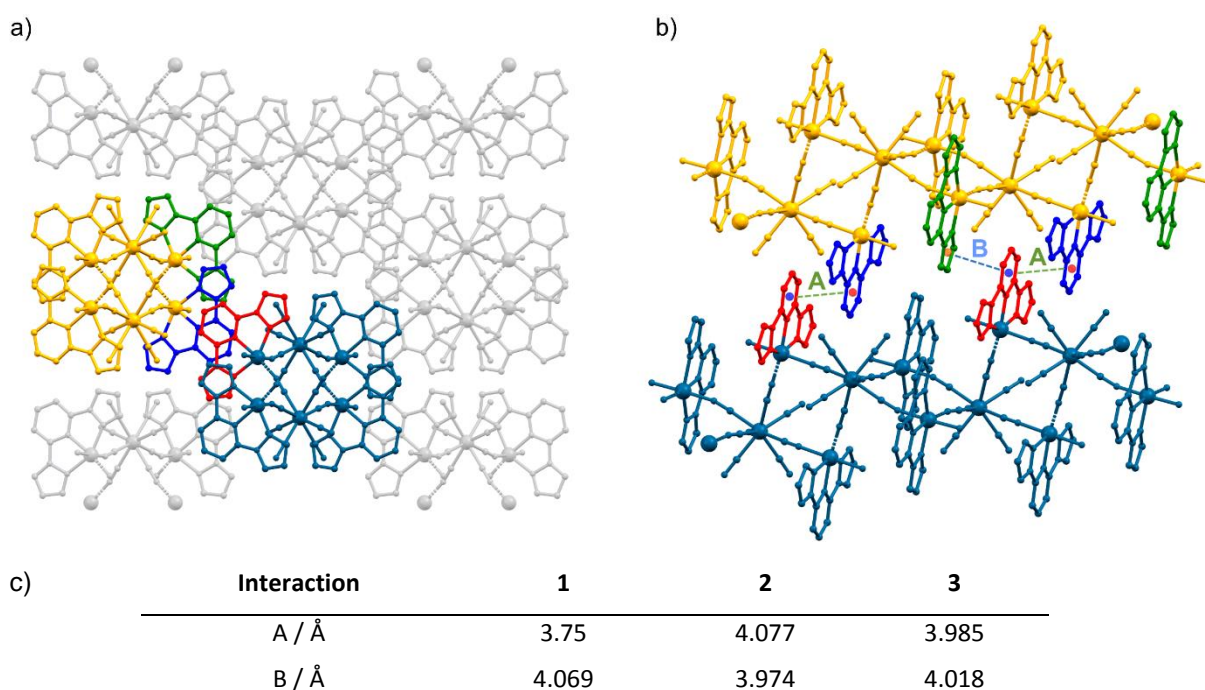

**Fig. S9** The visualization of supramolecular  $\pi$ - $\pi$  interactions involving aromatic rings of bpp ligands that exist in the crystal structure of **1–3** (presented on the example of **1**, a and b) together with the respective distances between aromatic rings for two types of observed interactions (c).

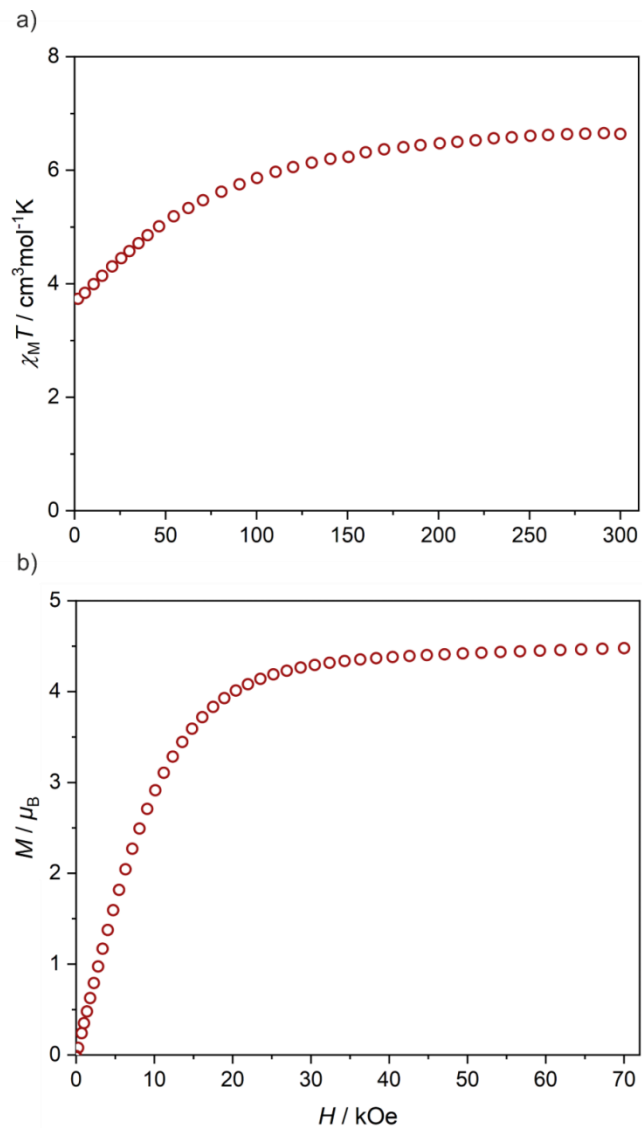

**Fig. S10** Direct-current (*dc*) magnetic characteristics of **1** including the temperature dependence of the  $\chi_M T$  product recorded in the 1.8–300 K range under  $H_{\text{dc}} = 1000$  Oe (a), and the field dependence of the molar magnetization measured at  $T = 1.8$  K (b).

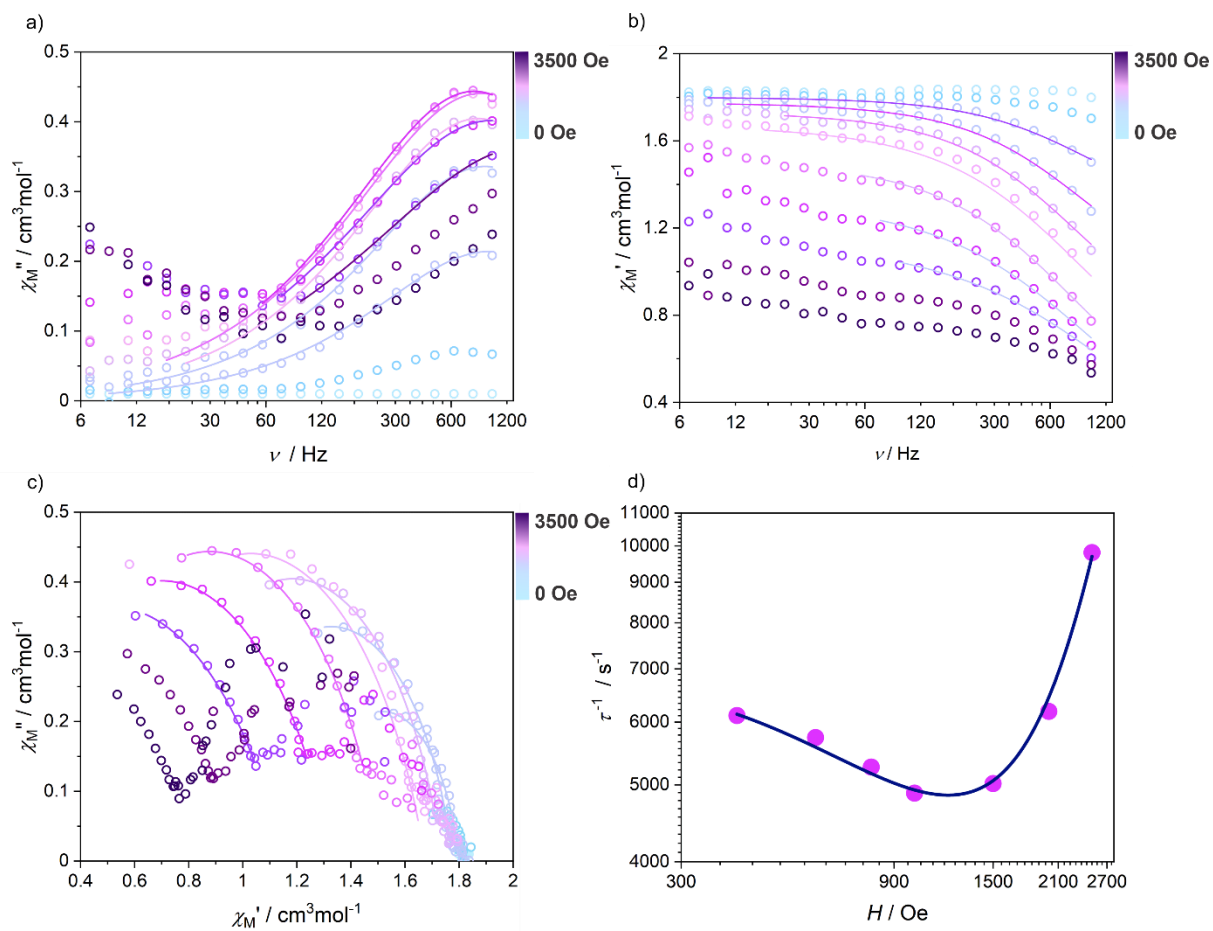

**Fig. S11** Magnetic-field-variable alternate-current (*ac*) magnetic susceptibility characteristics of **1** performed at  $T = 1.8$  K under  $H_{ac} = 2$  Oe including the frequency dependences of the out-of-phase susceptibility,  $\chi_M''$  (a) and the frequency dependences of the in-phase susceptibility,  $\chi_M'$  (b) at various *dc* magnetic fields, the related Cole-Cole (Argand) plots (c), and the field dependence of the resulting relaxation times (d). Solid lines in (a–c) represent the fitting following the generalized Debye model while the solid line in (d) represents the best-fit curve taking into account three magnetic relaxation pathways: QTM, Direct and Raman processes (see main text for details).

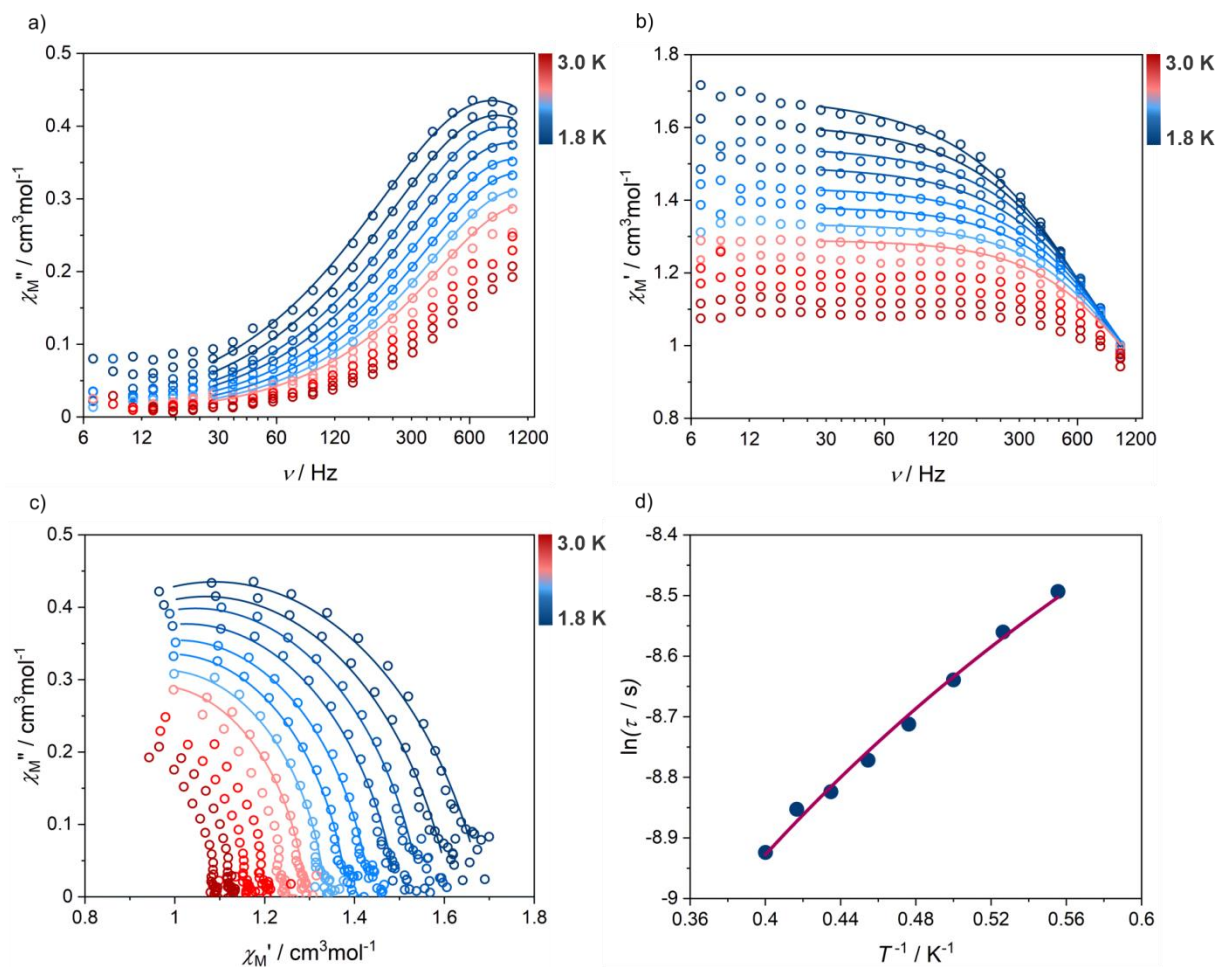

**Fig. S12** Temperature-variable alternate-current (*ac*) magnetic susceptibility characteristics of **1** performed under  $H_{ac} = 2$  Oe and  $H_{dc} = 1000$  Oe including the frequency dependences of the out-of-phase susceptibility,  $\chi_M''$  (a) and the frequency dependences of the in-phase susceptibility,  $\chi_M'$  (b) measured in the 1.8–3.0 K range, the related Cole-Cole (Argand) plots (c), and the temperature dependence of the resulting relaxation times (d). Solid lines in (a–c) represent the fitting following the generalized Debye model while the solid line in (d) represents the best-fit curve taking into account three magnetic relaxation pathways: QTM, Direct and Raman processes (see main text for details).

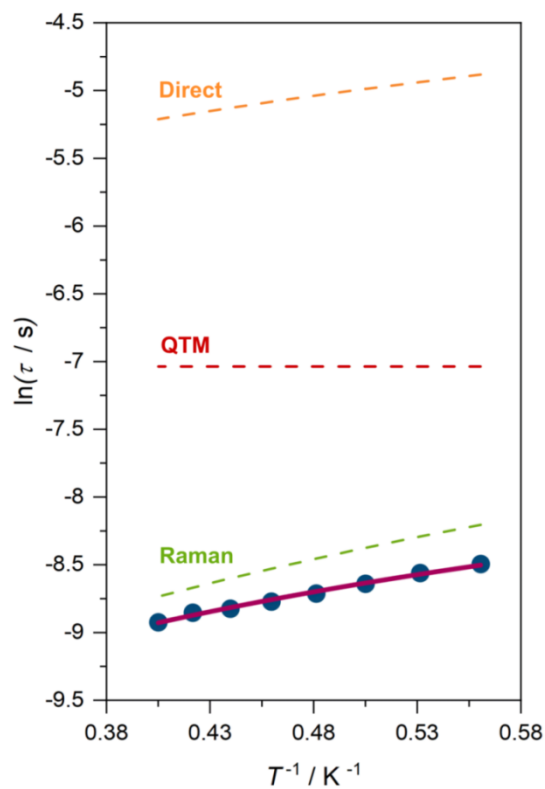

**Fig. S13** Temperature dependence of magnetic relaxation time for **1** obtained from the *ac* measurements at the optimal *dc* field of 1000 Oe presented with the best-fit curves taking into account three relaxation processes (Direct, QTM, Raman). Blue circles represent the experimental data while the dark purple solid line shows the best-fit resulting from the combined contribution from three different relaxation routes: QTM, a field-induced direct process, and a two-phonon Raman relaxation process. The contributions from each of these processes are shown by coloured dotted lines.

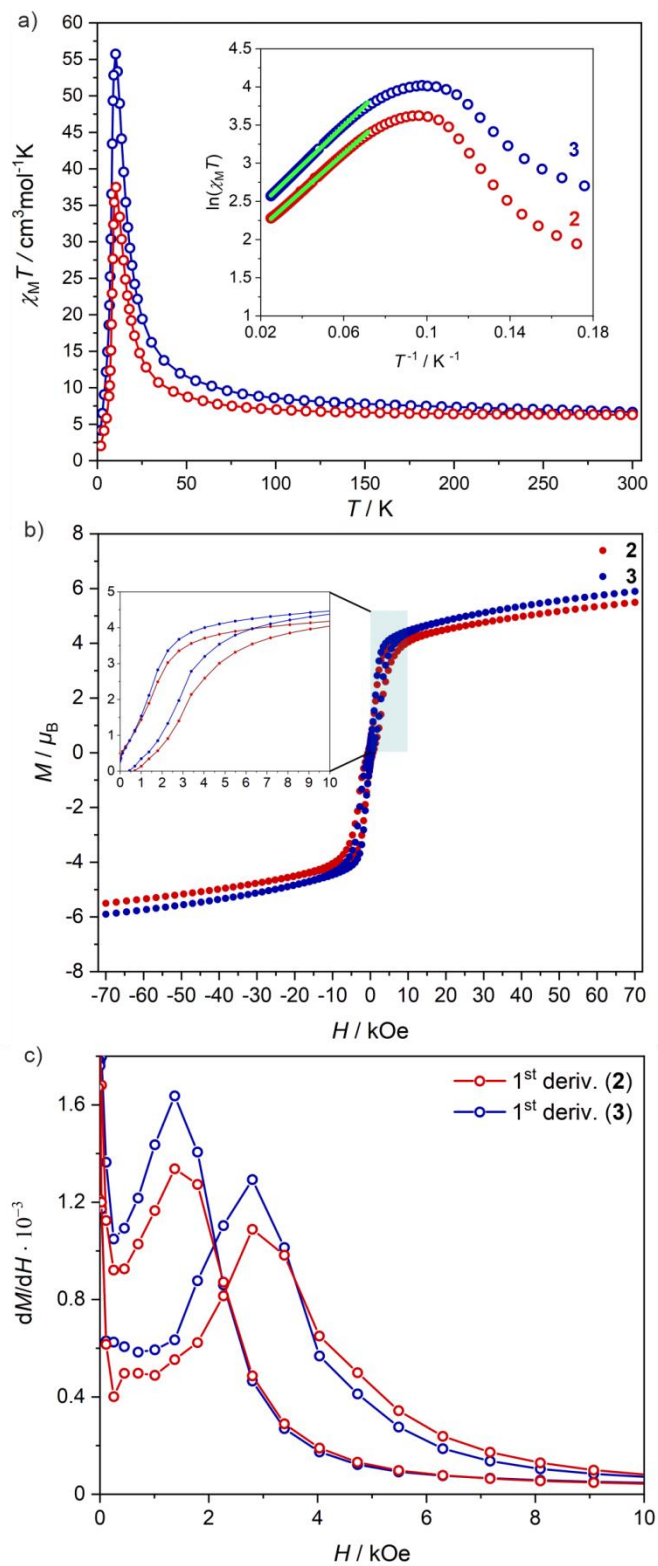

**Fig. S14** Main direct-current (*dc*) magnetic characteristics of **2** and **3**: the temperature dependences of the magnetic susceptibility–temperature product,  $\chi_M T$  gathered at  $H = 1 \text{ kOe}$  (a), presented with the  $\ln(\chi_M T)$  versus inverse temperature,  $T^{-1}$  plots given in the inset (green lines represent the linear fitting for the limited 14–40 K range, see main text for details), the field dependences of magnetization,  $M$  at  $T = 1.8 \text{ K}$  in the -70 to 70 kOe magnetic field ( $H$ ) range (b), presented with the enlargement of the limited 0–10 kOe region in the inset, and the related  $dM/dH$  versus  $H$  plots (c).



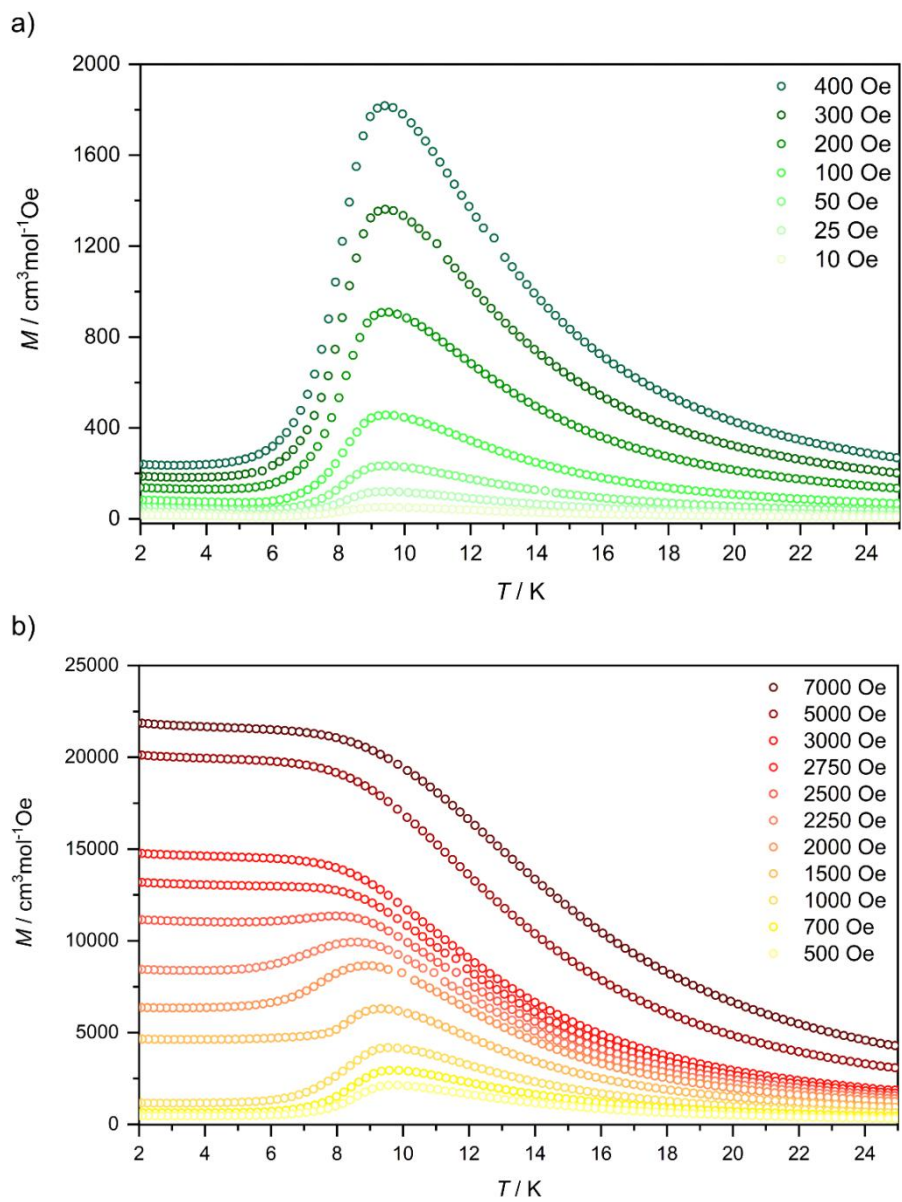

**Fig. S15** Field-cooled magnetization curves for **2** recorded at various  $dc$  fields from the 10–7000 Oe range.

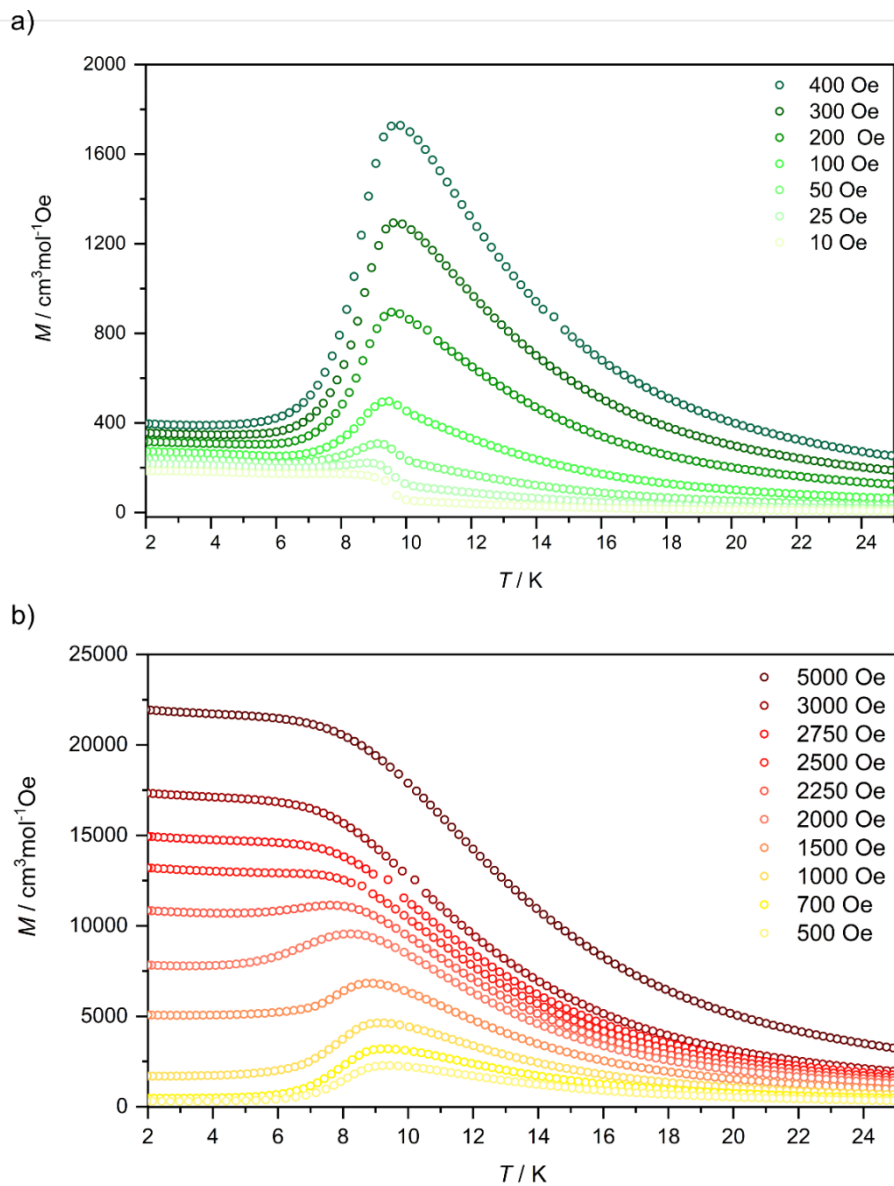

**Fig. S16** Field-cooled magnetization curves for **3** recorded at various  $dc$  fields from the 10–5000 Oe range.



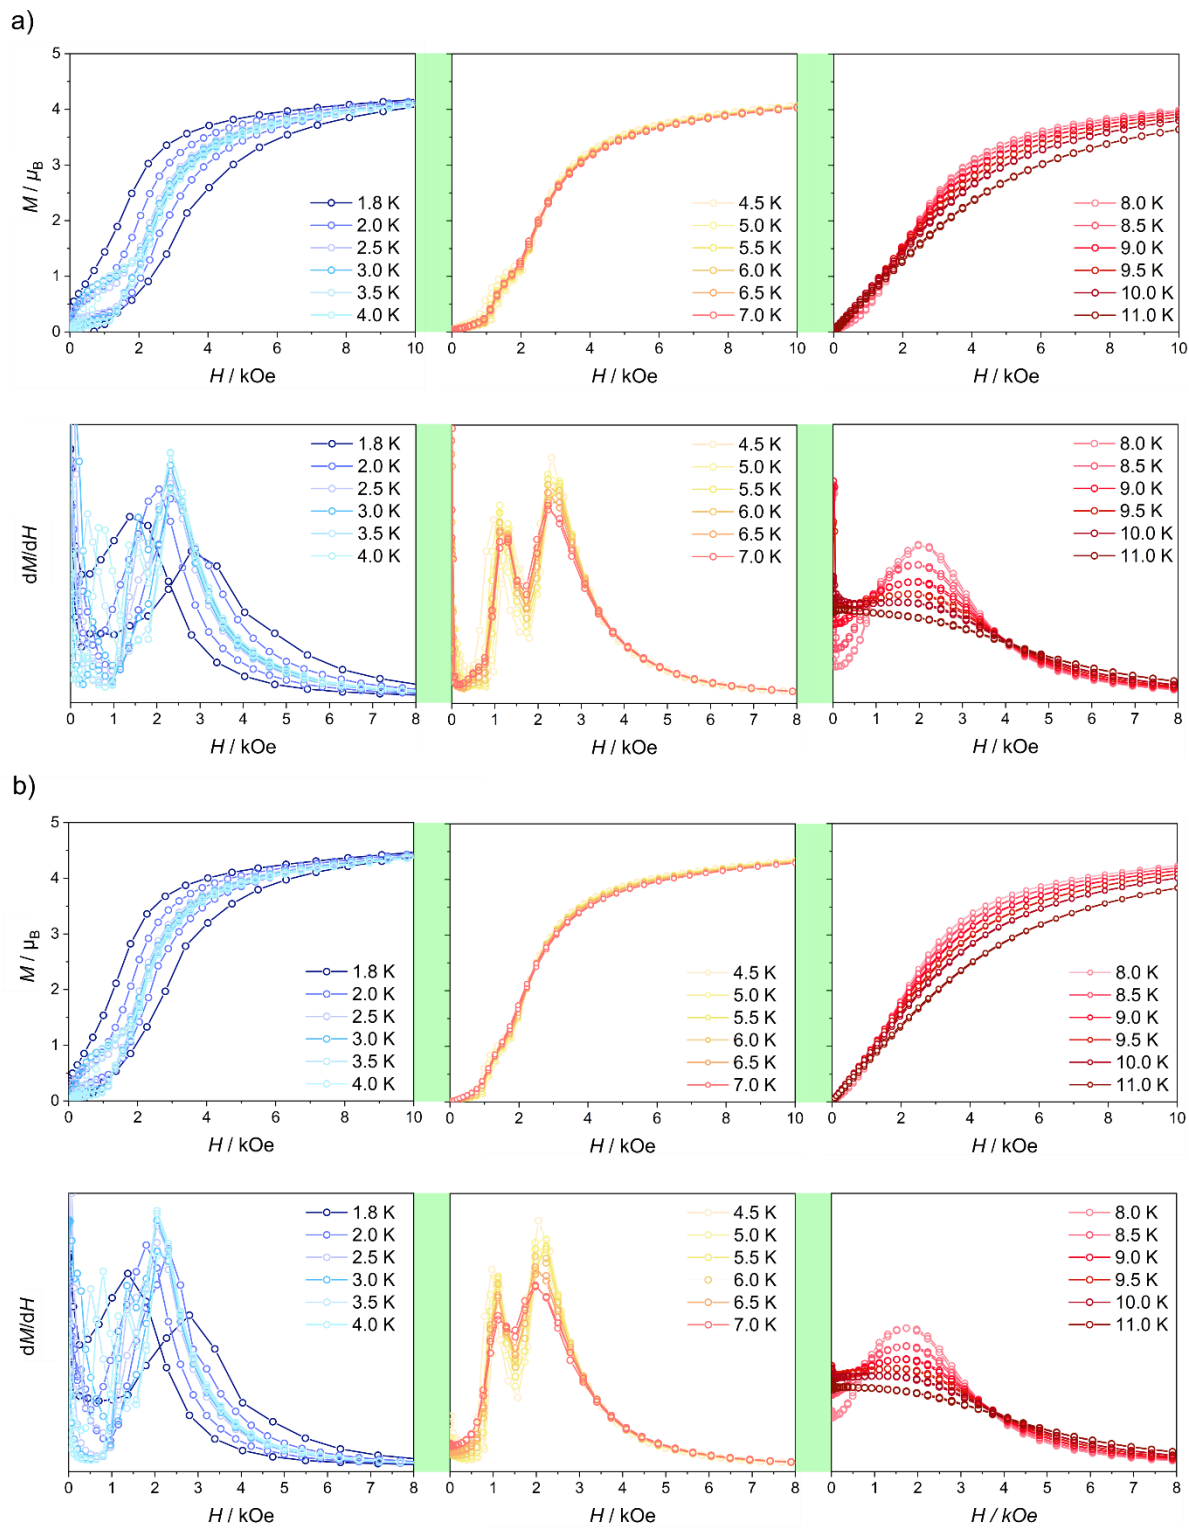

**Fig. S17** The set of field dependences of magnetization gathered at various temperatures, presented together with the corresponding  $dM/dH$  versus  $H$  plots, for **2** (a) and **3** (b).

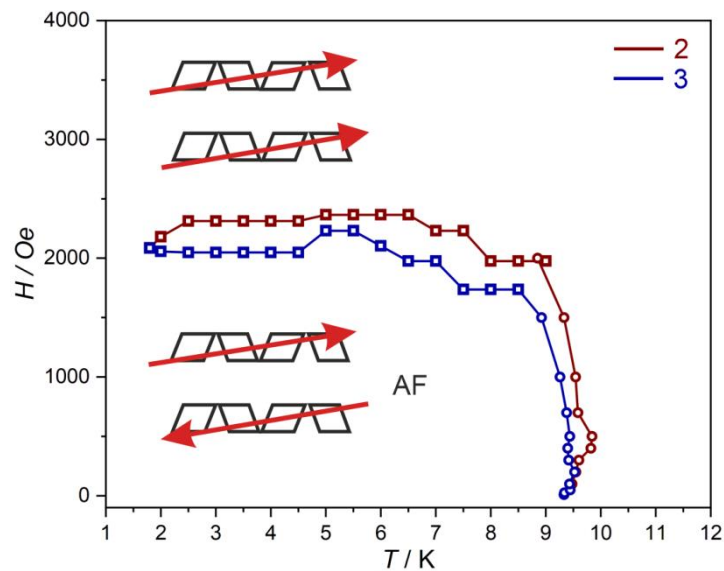

**Fig. S18** Magnetic field-temperature,  $H$ - $T$  phase diagram for **2** and **3** with the visualized antiferromagnetic phase realized by the antiparallel arrangement of magnetic moments resultant from the whole neighbouring chains (red arrows) and the field-induced ferromagnetic phase originating from the parallel alignment of these magnetic moments. The square points of the boundary between these magnetic phases were obtained from field dependences of magnetization,  $M(H)$  gathered at various temperatures (Fig. S17) while the circle points lying at higher temperatures were determined using the temperature dependences of magnetization gathered for various  $dc$  magnetic fields (Fig. S15 and Fig. S16 for **2** and **3**, respectively).

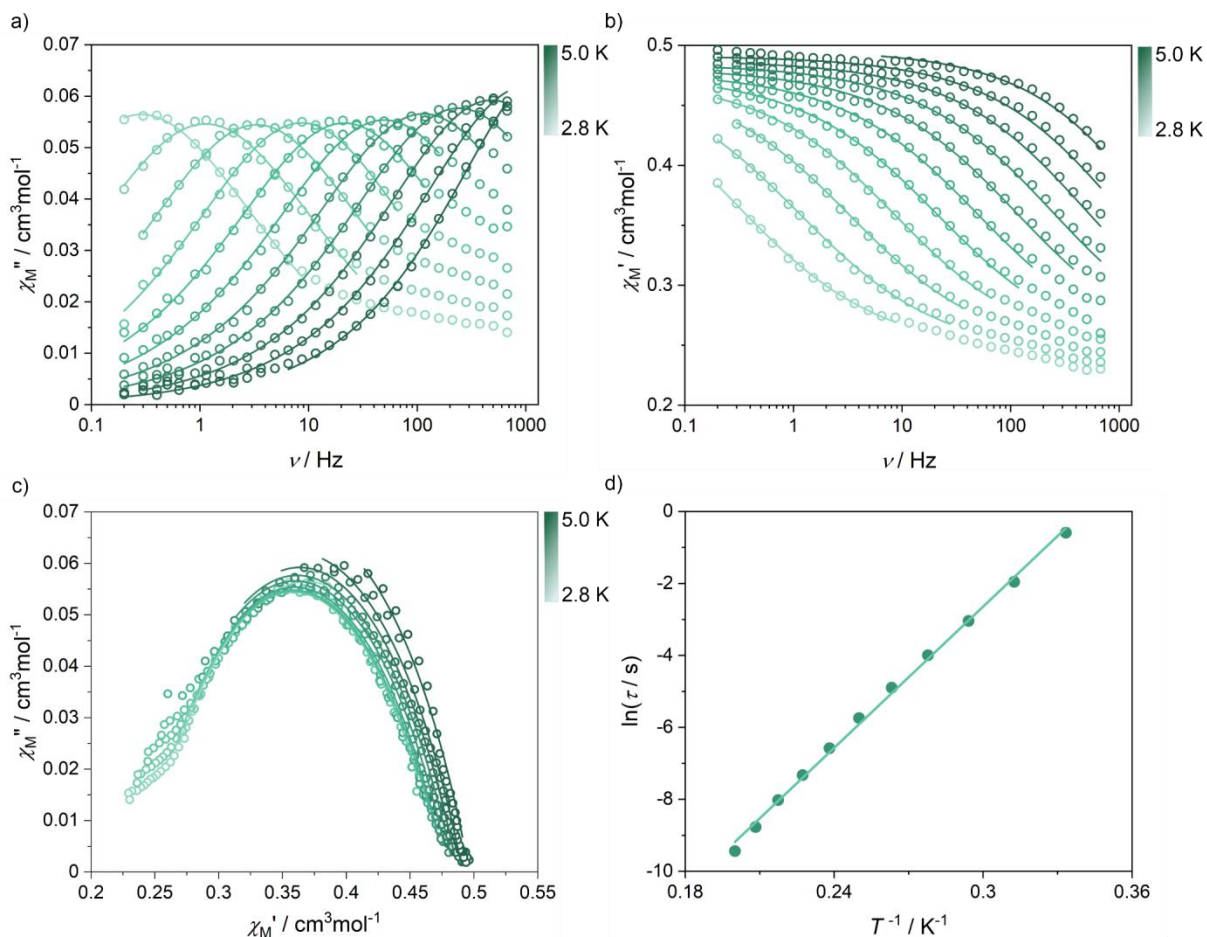

**Fig. S19** Temperature-variable alternate-current (*ac*) magnetic susceptibility characteristics of **2** performed under  $H_{ac} = 2$  Oe,  $H_{dc} = 1000$  Oe, including the frequency dependences of the out-of-phase susceptibility,  $\chi_M''$  (a) and the frequency dependences of the in-phase susceptibility,  $\chi_M'$  (b) measured in the 1.8–5.0 K range, the related Cole-Cole (Argand) plots (c), and the temperature dependence of the resulting relaxation times (d). Solid lines in (a–c) represent the fitting following the generalized Debye model while the solid line in (d) represents the linear fitting according to the Arrhenius-type process (see main text for details).

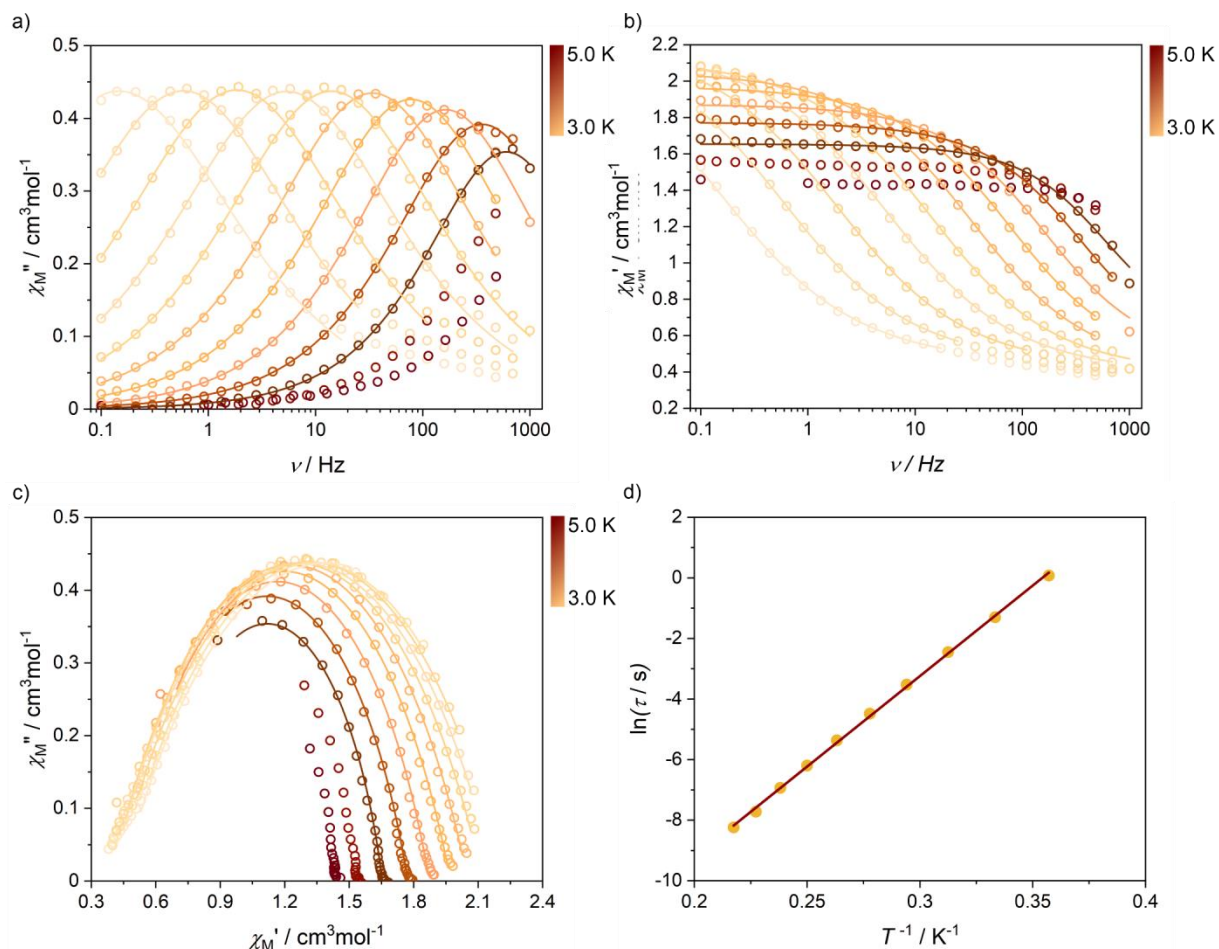

**Fig. S20** Temperature-variable alternate-current (*ac*) magnetic susceptibility characteristics of **3** performed under  $H_{ac} = 2$  Oe,  $H_{dc} = 1000$  Oe, including the frequency dependences of the out-of-phase susceptibility,  $\chi_M''$  (a) and the frequency dependences of the in-phase susceptibility,  $\chi_M'$  (b) measured in the 1.8–5.0 K range, the related Cole-Cole (Argand) plots (c), and the temperature dependence of the resulting relaxation times (d). Solid lines in (a–c) represent the fitting following the generalized Debye model while the solid line in (d) represents the linear fitting according to the Arrhenius-type process (see main text for details).

**Table S5** Description of the basis sets for two models: **S** (small) and **L** (large) employed in the *ab initio* calculations of the Co<sup>II</sup> crystal field effect and magnetic properties of **1**, **2**, and **3**.

| model S                  | L                                                                               |
|--------------------------|---------------------------------------------------------------------------------|
| Co.ANO-RCC-VDZP 5S4P2D1F | Co.ANO-RCC-VTZP 6S5P3D2F1G                                                      |
| Ta.ANO-RCC-VDZ 7S6P4D2F  | Ta.ANO-RCC-VDZ 7S6P4D2F                                                         |
| Cl.ANO-RCC-VDZ 4S3P      | Cl.ANO-RCC-VDZP 4S3P1D                                                          |
| Br.ANO-RCC-VDZ 5S4P1D    | Br.ANO-RCC-VDZP 5S4P2D                                                          |
| N.ANO-RCC-VDZ 3S2P       | N.ANO-RCC-VDZP 3S2P1D (first coordination sphere)<br>N.ANO-RCC-VDZ 3S2P (other) |
| O.ANO-RCC-VDZ 3S2P       | O.ANO-RCC-VDZP 3S2P1D                                                           |
| C.ANO-RCC-VDZ 3S2P       | C.ANO-RCC-VDZ 3S2P                                                              |
| H.ANO-RCC-VDZ 2S         | H.ANO-RCC-VDZ 2S                                                                |

**Table S6** The energy splitting of six ground Kramers doublets (KDs) of the <sup>4</sup>T<sub>1g</sub> multiplet (rising from the <sup>4</sup>F term), shown together with  $g_x$ ,  $g_y$ , and  $g_z$  components of the pseudo- $g$ -tensors in the basis of each KD, for Co(II) (Co1) complexes of **1**, obtained using the **S** and **L** *ab initio* models (Table S5).

| KD       | Co1 (compound <b>1</b> ), model S |       |       |       | Co1 (compound <b>1</b> ), model L |       |       |       |
|----------|-----------------------------------|-------|-------|-------|-----------------------------------|-------|-------|-------|
|          | energy / cm <sup>-1</sup>         | $g_x$ | $g_y$ | $g_z$ | energy / cm <sup>-1</sup>         | $g_x$ | $g_y$ | $g_z$ |
| <b>1</b> | 0                                 | 2.324 | 4.025 | 6.438 | 0                                 | 2.304 | 3.864 | 6.561 |
| <b>2</b> | 207.079                           | 0.902 | 1.170 | 5.206 | 204.627                           | 1.035 | 1.276 | 5.221 |
| <b>3</b> | 597.139                           | 1.788 | 2.817 | 5.021 | 598.974                           | 1.745 | 2.915 | 4.893 |
| <b>4</b> | 946.900                           | 0.494 | 0.923 | 3.397 | 942.268                           | 0.471 | 0.821 | 3.460 |
| <b>5</b> | 1119.377                          | 0.748 | 1.904 | 3.465 | 1128.203                          | 0.803 | 2.056 | 3.449 |
| <b>6</b> | 1226.576                          | 0.765 | 0.861 | 3.542 | 1235.427                          | 0.662 | 0.746 | 3.592 |

**Table S7** The energy splitting of six ground Kramers doublets (KDs) of the <sup>4</sup>T<sub>1g</sub> multiplet (rising from the <sup>4</sup>F term), shown together with  $g_x$ ,  $g_y$ , and  $g_z$  components of the pseudo- $g$ -tensors in the basis of each KD, for Co(II) (Co1A) complexes of **2**, obtained using the **S** and **L** *ab initio* models (Table S5).

| KD       | Co1A (compound <b>2</b> ), model S |       |       |       | Co1A (compound <b>2</b> ), model L |       |       |       |
|----------|------------------------------------|-------|-------|-------|------------------------------------|-------|-------|-------|
|          | energy / cm <sup>-1</sup>          | $g_x$ | $g_y$ | $g_z$ | energy / cm <sup>-1</sup>          | $g_x$ | $g_y$ | $g_z$ |
| <b>1</b> | 0                                  | 1.856 | 2.649 | 7.407 | 0                                  | 1.759 | 2.373 | 7.624 |
| <b>2</b> | 145.465                            | 2.103 | 2.113 | 5.432 | 151.678                            | 2.287 | 2.346 | 5.267 |
| <b>3</b> | 722.704                            | 1.108 | 2.429 | 5.842 | 695.353                            | 0.979 | 2.418 | 5.701 |
| <b>4</b> | 986.275                            | 1.208 | 1.336 | 3.639 | 958.358                            | 1.185 | 1.283 | 3.598 |
| <b>5</b> | 1535.551                           | 4.035 | 3.348 | 1.161 | 1579.933                           | 4.152 | 3.351 | 1.239 |
| <b>6</b> | 1657.354                           | 0.147 | 0.209 | 4.221 | 1695.868                           | 0.197 | 0.252 | 4.317 |

**Table S8** The energy splitting of six ground Kramers doublets (KDs) of the  ${}^4T_{1g}$  multiplet (rising from the  ${}^4F$  term), shown together with  $g_x$ ,  $g_y$ , and  $g_z$  components of the pseudo- $g$ -tensors in the basis of each KD, for Co(II) (Co1B) complexes of **2**, obtained using the **S** and **L** *ab initio* models (Table S5).

| KD       | Co1B (compound <b>2</b> ), model <b>S</b> |       |       |       | Co1B (compound <b>2</b> ), model <b>L</b> |       |       |       |
|----------|-------------------------------------------|-------|-------|-------|-------------------------------------------|-------|-------|-------|
|          | energy / $\text{cm}^{-1}$                 | $g_x$ | $g_y$ | $g_z$ | energy / $\text{cm}^{-1}$                 | $g_x$ | $g_y$ | $g_z$ |
| <b>1</b> | 0                                         | 1.860 | 2.327 | 7.734 | 0                                         | 1.842 | 2.321 | 7.722 |
| <b>2</b> | 180.122                                   | 2.081 | 2.589 | 4.989 | 176.833                                   | 2.111 | 2.562 | 5.024 |
| <b>3</b> | 613.838                                   | 4.511 | 3.060 | 0.766 | 621.712                                   | 4.557 | 3.090 | 0.798 |
| <b>4</b> | 906.083                                   | 0.521 | 0.573 | 3.419 | 909.494                                   | 0.524 | 0.580 | 3.443 |
| <b>5</b> | 1451.179                                  | 1.009 | 1.920 | 5.215 | 1459.559                                  | 1.011 | 1.910 | 5.228 |
| <b>6</b> | 1566.673                                  | 1.286 | 1.413 | 4.018 | 1574.281                                  | 1.294 | 1.427 | 4.031 |

**Table S9** The energy splitting of six ground Kramers doublets (KDs) of the  ${}^4T_{1g}$  multiplet (rising from the  ${}^4F$  term), shown together with  $g_x$ ,  $g_y$ , and  $g_z$  components of the pseudo- $g$ -tensors in the basis of each KD, for Co(II) (Co1A) complexes of **3**, obtained using the **S** and **L** *ab initio* models (Table S5).

| KD       | Co1A (compound <b>3</b> ), model <b>S</b> |       |       |       | Co1A (compound <b>3</b> ), model <b>L</b> |       |       |       |
|----------|-------------------------------------------|-------|-------|-------|-------------------------------------------|-------|-------|-------|
|          | energy / $\text{cm}^{-1}$                 | $g_x$ | $g_y$ | $g_z$ | energy / $\text{cm}^{-1}$                 | $g_x$ | $g_y$ | $g_z$ |
| <b>1</b> | 0                                         | 1.964 | 2.911 | 7.262 | 0                                         | 1.918 | 2.681 | 7.423 |
| <b>2</b> | 154.825                                   | 1.914 | 1.938 | 5.447 | 158.412                                   | 2.053 | 2.143 | 5.328 |
| <b>3</b> | 700.686                                   | 1.218 | 2.481 | 5.703 | 673.492                                   | 1.090 | 2.467 | 5.565 |
| <b>4</b> | 978.994                                   | 1.097 | 1.261 | 3.613 | 951.891                                   | 1.078 | 1.211 | 3.581 |
| <b>5</b> | 1420.822                                  | 3.787 | 3.310 | 1.057 | 1445.039                                  | 3.939 | 3.289 | 1.118 |
| <b>6</b> | 1546.152                                  | 0.055 | 0.129 | 4.098 | 1567.143                                  | 0.123 | 0.190 | 4.158 |

**Table S10** The energy splitting of six ground Kramers doublets (KDs) of the  ${}^4T_{1g}$  multiplet (rising from the  ${}^4F$  term), shown together with  $g_x$ ,  $g_y$ , and  $g_z$  components of the pseudo- $g$ -tensors in the basis of each KD, for Co(II) (Co1B) complexes of **3**, obtained using the **S** and **L** *ab initio* models (Table S5).

| KD       | Co1B (compound <b>3</b> ), model <b>S</b> |       |       |       | Co1B (compound <b>3</b> ), model <b>L</b> |       |       |       |
|----------|-------------------------------------------|-------|-------|-------|-------------------------------------------|-------|-------|-------|
|          | energy / $\text{cm}^{-1}$                 | $g_x$ | $g_y$ | $g_z$ | energy / $\text{cm}^{-1}$                 | $g_x$ | $g_y$ | $g_z$ |
| <b>1</b> | 0                                         | 2.071 | 3.036 | 7.117 | 0                                         | 2.050 | 2.974 | 7.147 |
| <b>2</b> | 164.452                                   | 1.715 | 1.893 | 5.416 | 161.837                                   | 1.763 | 1.925 | 5.413 |
| <b>3</b> | 669.088                                   | 1.233 | 2.773 | 5.337 | 671.668                                   | 1.214 | 2.758 | 5.355 |
| <b>4</b> | 969.534                                   | 0.843 | 1.014 | 3.442 | 967.394                                   | 0.862 | 1.027 | 3.466 |
| <b>5</b> | 1320.798                                  | 0.861 | 2.185 | 4.481 | 1335.413                                  | 0.884 | 2.218 | 4.517 |
| <b>6</b> | 1452.203                                  | 0.918 | 0.953 | 3.833 | 1465.779                                  | 0.916 | 0.949 | 3.867 |

**Table S11** *Ab initio* calculated (model L) zero-field splitting parameters and the related *g*-tensor components for Co(II) complexes of 1–3 determined for the full spin Hamiltonian (equation 1, below the table) for effective pseudo-spin  $S = 3/2$  compared with the *g*-tensor components corresponding to the lowest-lying Kramers doublet of the  $^4T_{1g}$  multiplet (Tables S6–S10, model L).<sup>S3–S7</sup>

|                                                                            | Co1 complex of 1 | Co1A complex of 2 | Co1B complex of 2 | Co2A complex of 3 | Co2B complex of 3 |
|----------------------------------------------------------------------------|------------------|-------------------|-------------------|-------------------|-------------------|
| full spin Hamiltonian for effective pseudo-spin $S = 3/2$                  |                  |                   |                   |                   |                   |
| $g_x$                                                                      | 2.852            | 2.025             | 1.996             | 2.013             | 2.004             |
| $g_y$                                                                      | 2.525            | 2.309             | 2.262             | 2.343             | 2.368             |
| $g_z$                                                                      | 1.869            | 2.871             | 2.927             | 2.870             | 2.838             |
| $D / \text{cm}^{-1}$                                                       | 98.391           | 66.691            | 77.539            | 71.875            | 75.266            |
| $E / \text{cm}^{-1}$                                                       | -16.199          | 20.848            | 24.531            | 19.215            | 17.154            |
| $ E/D $                                                                    | 0.165            | 0.313             | 0.316             | 0.267             | 0.228             |
| lowest-lying Kramers doublet of the $^4T_{1g}$ multiplet (pseudo-spin 1/2) |                  |                   |                   |                   |                   |
| $g_x$                                                                      | 2.304            | 1.759             | 1.842             | 1.918             | 2.050             |
| $g_y$                                                                      | 3.864            | 2.373             | 2.321             | 2.681             | 2.974             |
| $g_z$                                                                      | 6.561            | 7.624             | 7.722             | 7.423             | 7.147             |

Equation 1 (full spin Hamiltonian for  $S = 3/2$ , hyperfine interactions omitted):<sup>S3</sup>

$$H = \beta(g_z B_z S_z + g_x B_x S_x + g_y B_y S_y) + D \left[ S_z^2 - \frac{1}{3} S(S+1) \right] + E(S_x^2 - S_y^2)$$

where  $\beta$  is the Bohr magneton,  $g_x$ ,  $g_y$ , and  $g_z$  are the principal values of the electronic *g*-tensor,  $D$  is the axial ZFS (zero-field splitting) parameter, while  $E$  is the rhombic ZFS parameter.

S3 E. Y. Misochko, A. V. Akimov, D. V. Korchagin, J. Nehr Korn, M. Ozerov, A. V. Palii, J. M. Clemente-Juan and S. M. Aldoshin, Purely Spectroscopic Determination of the Spin Hamiltonian Parameters in High-Spin Six-Coordinated Cobalt(II) Complexes with Large Zero-Field Splitting, *Inorg. Chem.*, 2019, **58**, 16434–16444.

S4 E. Ferentinos, M. Xu, A. Grigoropoulos, I. Bratsos, C. P. Raptopoulou, V. Psycharis, S.-D. Jiang and P. Kyritsis, Field-induced slow relaxation of magnetization in the  $S = 3/2$  octahedral complexes *trans*-[Co{(OPPh<sub>2</sub>)(EPPH<sub>2</sub>)N<sub>2</sub>(dmf)<sub>2</sub>}]<sub>2</sub>, [E = S, Se: effects of Co–Se vs. Co–S coordination, *Inorg. Chem. Front.*, 2019, **6**, 1405–1414.

S5 M. Böhme and W. Plass, How to link theory and experiment for single-chain magnets beyond the Ising model: magnetic properties modeled from *ab initio* calculations of molecular fragments, *Chem. Sci.*, 2019, **10**, 9189–9202.

S6 L. F. Chibotaru and L. Ungur, *Ab initio* calculation of anisotropic magnetic properties of complexes. I. Unique definition of pseudospin Hamiltonians and their derivation, *J. Chem. Phys.*, 2012, **137**, 064112.

S7 I. F. Galvam, M. Vacher, A. Alavi, C. Angeli, F. Aquilant, J. Autschbach, J. J. Bao, S. I. Bokarev, N. A. Bogdanov, R. K. Carlson, L. F. Chibotaru, J. Creutzberg, N. Dattani, M. G. Delcey, S. S. Dong, A. Dreuw, L. Freitag, L. M. Frutos, L. Gagliardi, F. Gendron, A. Giussani, L. Gonzalez, G. Grell, M. Guo, C. E. Hoyer, M. Johansson, S. Keller, S. Knecht, G. Kovacevic, E. Kallman, G. L. Manni, M. Lundberg, Y. Ma, S. Mai, J. P. Malhado, P. A. Malmqvist, P. Marquetand, S. A. Mewes, J. Norell, M. Olivucci, M. Opperl, Q. M. Phung, K. Perloot, F. Plasser, M. Reiher, A. M. Sand, L. Schapiro, P. Sharma, C. J. Stein, L. K. Sorensen, D. G. Truhlar, M. Ugandi, L. Ungur, A. Valentini, S. Vancoillie, V. Veryazov, O. Weser, T. A. Wesolowski, P.-O. Widmark, S. Wouters, A. Zech, J. P. Zobel and R. Lindh, OpenMolcas: From Source Code to Insight, *J. Chem. Theory Comput.*, 2019, **15**, 5925–5964.

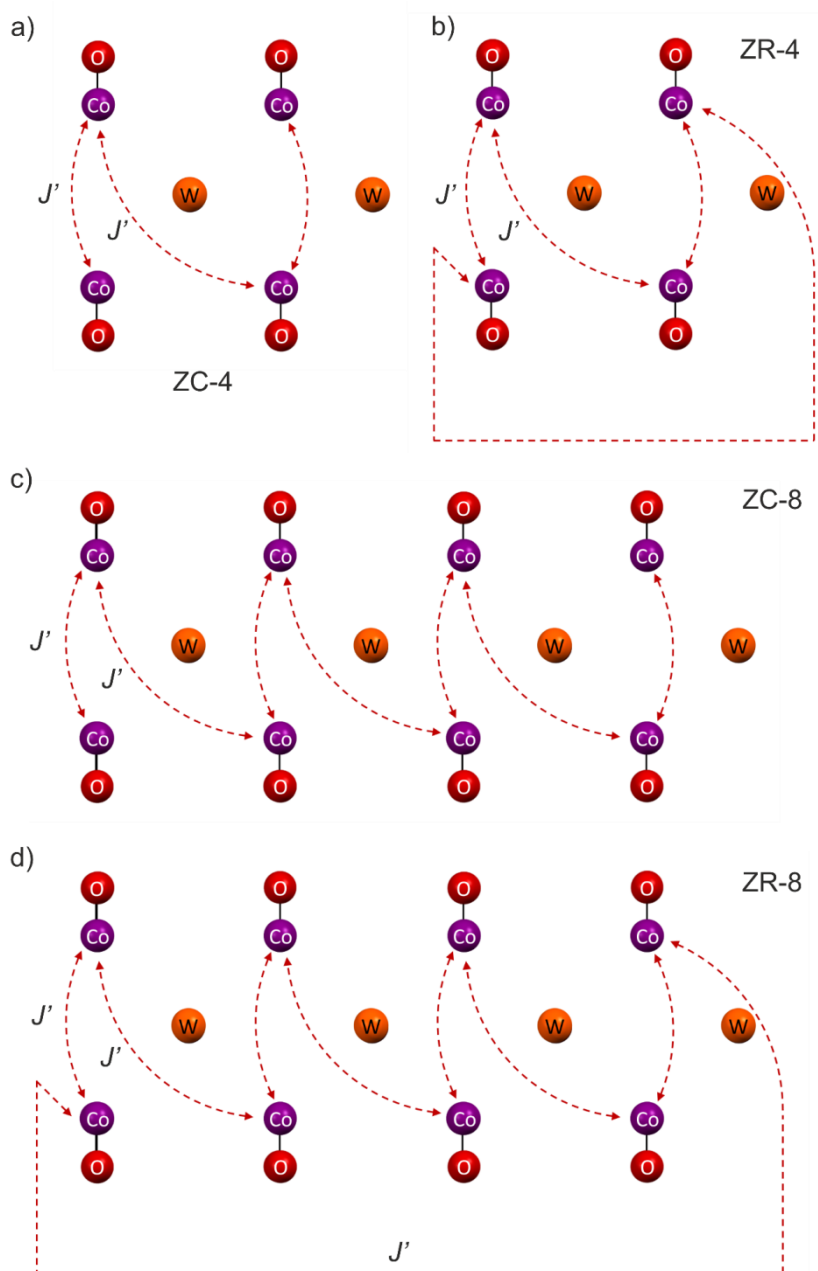

**Fig. S21** Visualization of four additionally considered magneto-structural models for **1**, including a four-membered zig-zag chain (ZC-4) (a), a four-membered zig-zag ring (ZR-4) (b), an eight-membered zig-zag chains (ZC-8) (c), and an eight-membered zig-zag ring (ZR-8) (d). The  $J'$  stands for the intermetallic Co–Co magnetic coupling constant. Only the Co and W centres, together with the O-atoms attached to the Co centres, were shown while the other atoms of the coordination chains of **1** were omitted for clarity. The results of modelling of the magnetic properties of **1** obtained using these models are presented in Tables S13–S15, Fig. S26–S30, while the related best-fit curves to the experimental magnetic data are shown in Fig. S22–S23.



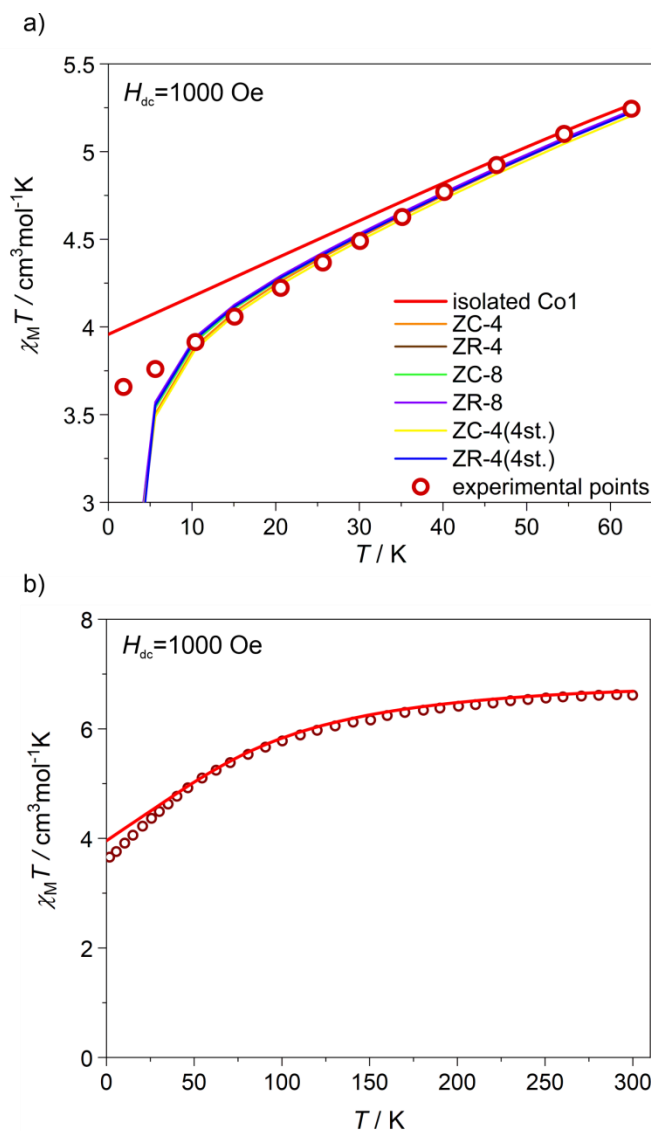

**Fig. S22** Experimental temperature dependence of the  $\chi_M T$  product under  $H_{dc} = 1000$  Oe of **1** in the limited temperature range below 70 K, compared with the  $\chi_M T(T)$  curve calculated for isolated Co1 complexes using the results of the *ab initio* calculations and the  $\chi_M T(T)$  curves calculated using the results of the *ab initio* calculations combined with modelling the intrachain magnetic exchange ( $J' = -0.6 \text{ cm}^{-1}$ ) using the ZC-4, ZR-4, ZC-8, ZR-8, ZC-4(4st.), and ZR-4(4st.) magneto structural models (a), and the experimental  $\chi_M T(T)$  curve in the broader 1.8–300 K range compared with the  $\chi_M T(T)$  curve calculated for isolated Co1 complexes using the results of the *ab initio* calculations (b). The models labelled with the extension (4st.) represent the extended calculations employing four higher energy states of Co centre (Table S6), not only the ground one as for all other models labelled without this extension.

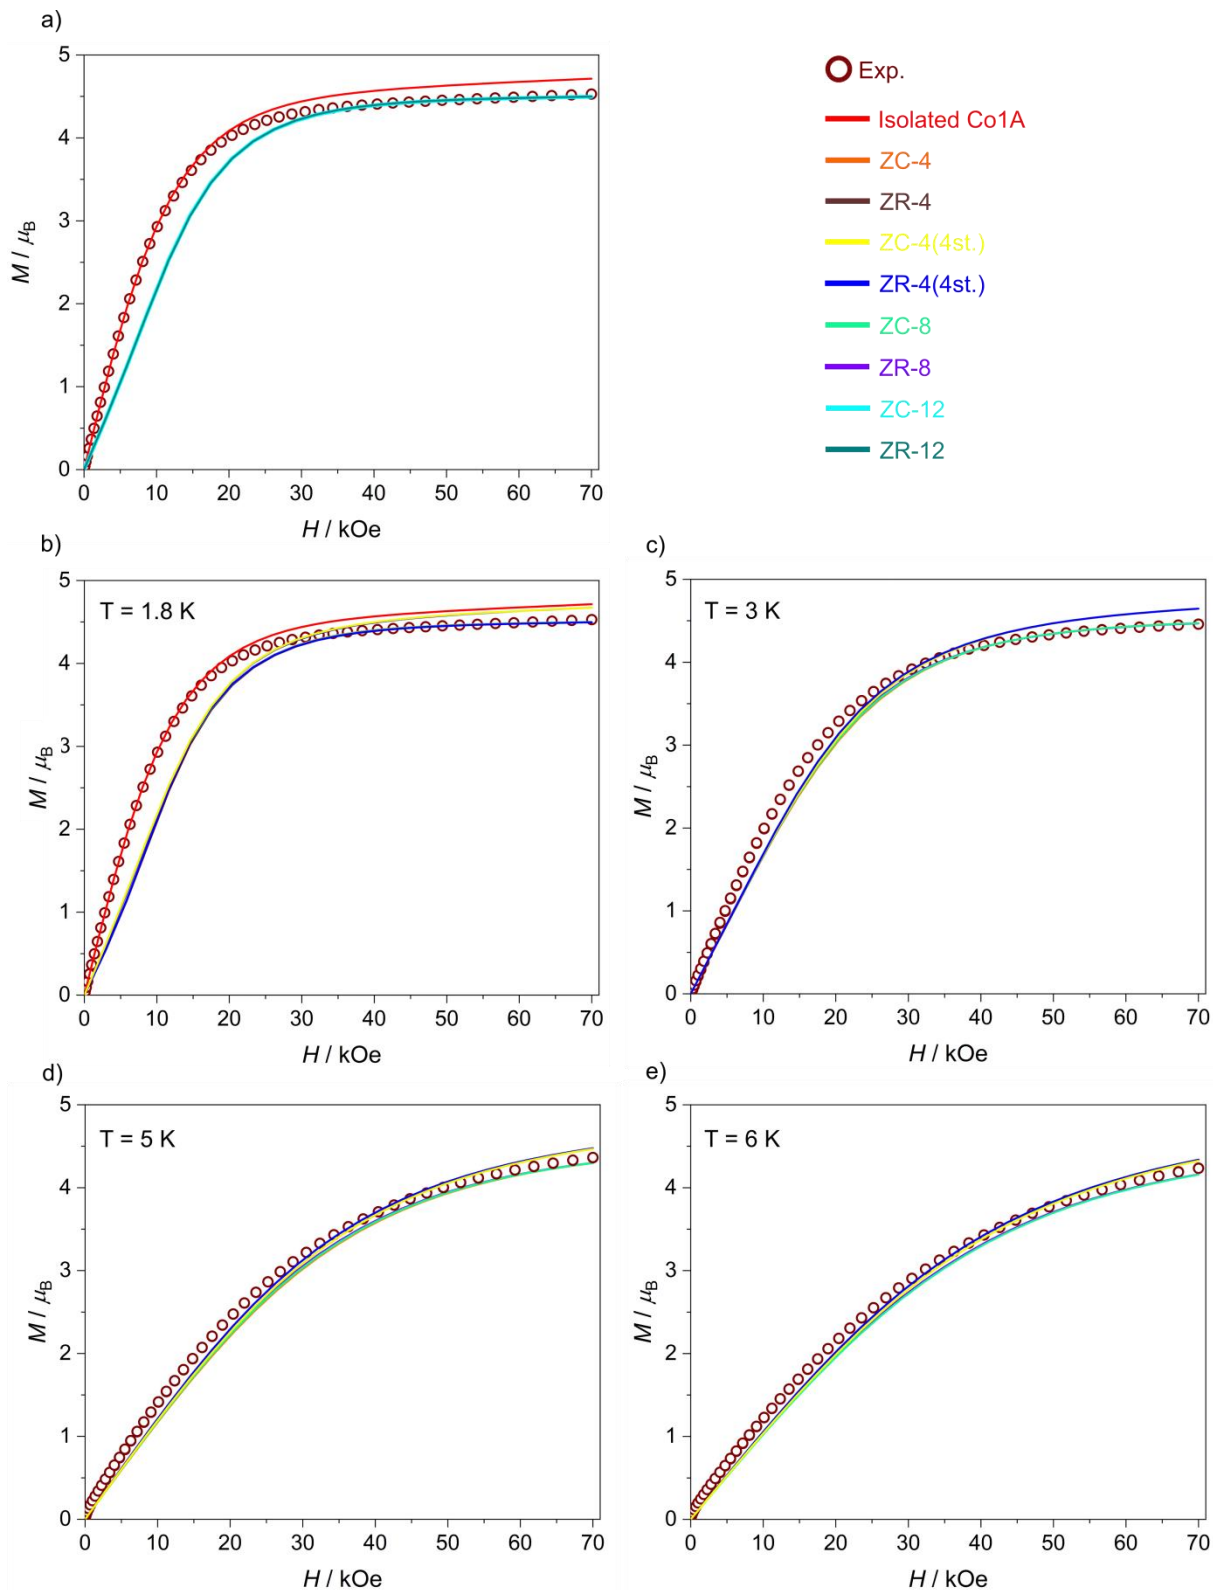

**Fig. S23** Experimental field dependence of magnetization for **1** gathered at 1.8 K (a, b), 3 K (c), 5 K (d), and 6 K (e), and compared with the respective  $M(H)$  curves calculated for isolated Co1 complexes using the results of the *ab initio* calculations (red curve in b) or calculated using the results of the *ab initio* calculations combined with modelling the intrachain magnetic exchange ( $J' = -0.6 \text{ cm}^{-1}$ ) using the ZC-12 and ZR-12 magneto-structural models (a) or the ZC-4, ZR-4, ZC-8, ZR-8, ZC-4(4st.), and ZR-4(4st.) magneto structural models (b–e).

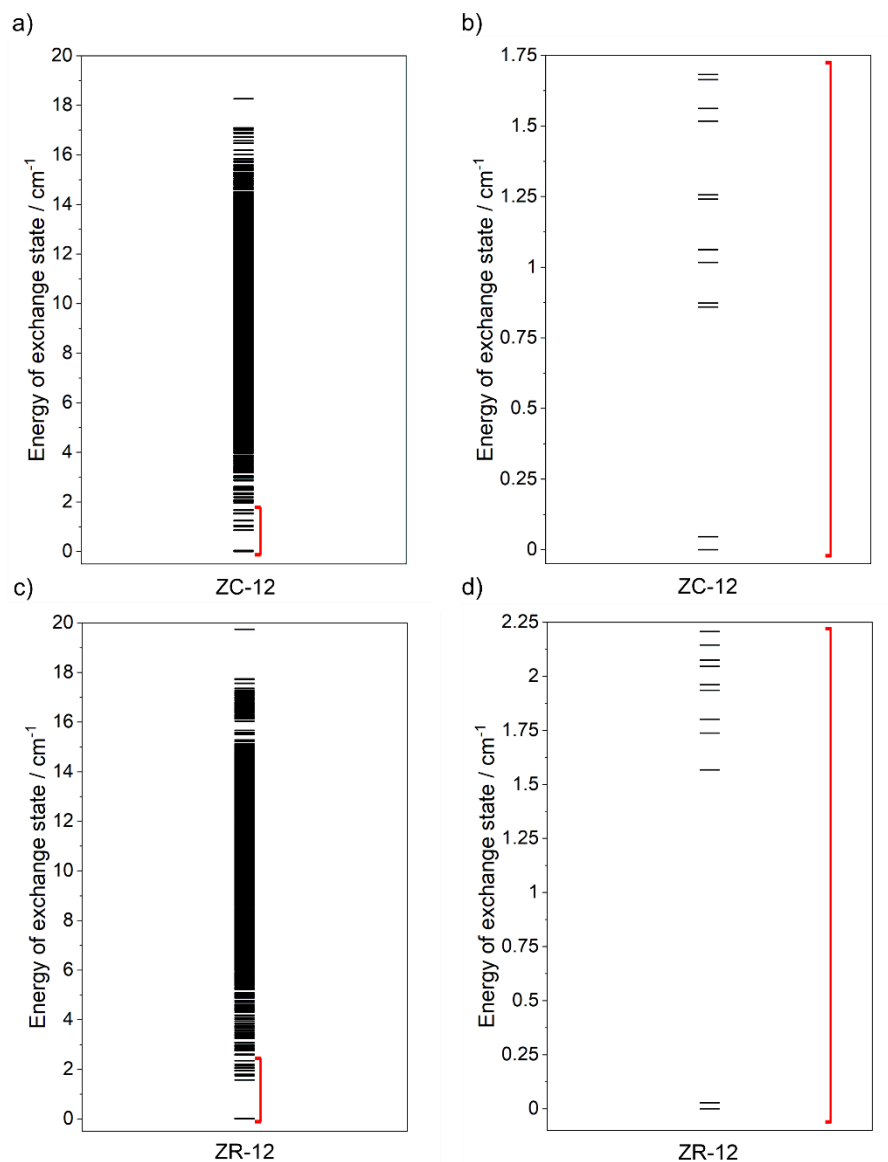

**Fig. S24** The scheme of exchange states for **1** calculated using the results of the *ab initio* calculations (Table S6, Fig. 5–6) combined with the fitting of the exchange constant  $J'$  according to two different theoretical magneto-structural models of a twelve-membered zig-zag chain (model ZC-12, a and b, see also Fig. 6c) and a twelve-membered zig-zag ring (model ZR-12, c and d, see also Fig. 6c). The (a) and (c) parts show the full calculated pattern of 2048 exchange states while the (b) and (d) parts represent the enlarged view on the lowest energy regions.

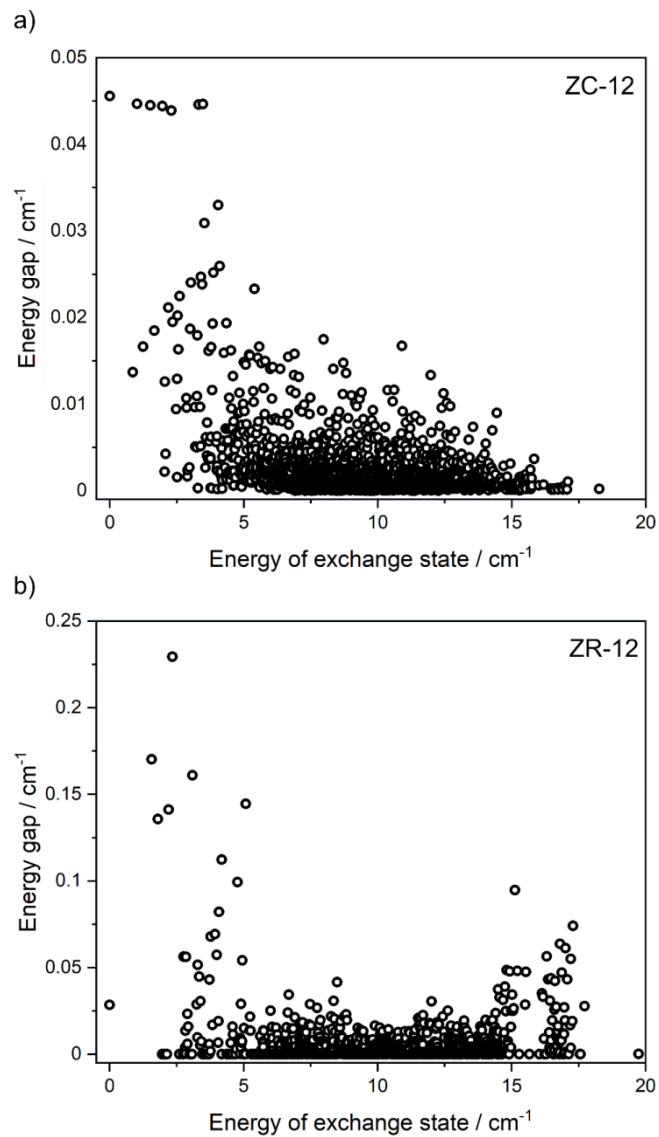

**Fig. S25** The dependence between the average energy of the pairs of exchange states (pseudo-doublets) and the related energy gaps determined for **1** using the *ab initio* calculations combined with the fitting of the exchange constant according to two magneto-structural models, named ZC-12 (a) and ZR-12 (b). The models are visualized in Fig. 6 while the numerical data for the obtained exchange states are gathered in Tables 2 and S12.

**Table S12** The extended set of selected parameters obtained from modelling the magnetic properties of **1** based on the results of the *ab initio* calculations combined with the fitting of the exchange constant *J* according to two magneto-structural models, named ZC-12 and ZR-12 (Fig. 6). The presented results include the lists of 32 lowest lying exchange states (16 lowest lying pairs of exchange states, pseudo-doublets) and the respective energy gaps. The further, higher lying states are visualized in Fig. S24 and S25. The selected parameters are also shown in Table 2. The lowest lying pairs of states showing the relatively large energy gaps are emphasized by bold fonts.

| No. of the pair of exchange states (pseudo-doublets) | Energy of a lower lying state / cm <sup>-1</sup> | Energy of a higher lying state / cm <sup>-1</sup> | Energy gap / cm <sup>-1</sup> |
|------------------------------------------------------|--------------------------------------------------|---------------------------------------------------|-------------------------------|
| model ZC-12 (Fig. 6c)                                |                                                  |                                                   |                               |
| <b>1</b>                                             | <b>0.000</b>                                     | <b>0.046</b>                                      | <b>0.046</b>                  |
| 2                                                    | 0.859                                            | 0.873                                             | 0.014                         |
| 3                                                    | 1.017                                            | 1.062                                             | 0.045                         |
| 4                                                    | 1.241                                            | 1.257                                             | 0.017                         |
| 5                                                    | 1.517                                            | 1.562                                             | 0.045                         |
| 6                                                    | 1.664                                            | 1.682                                             | 0.018                         |
| 7                                                    | 1.961                                            | 2.005                                             | 0.044                         |
| 8                                                    | 2.044                                            | 2.047                                             | 0.003                         |
| 9                                                    | 2.053                                            | 2.066                                             | 0.013                         |
| 10                                                   | 2.089                                            | 2.093                                             | 0.004                         |
| 11                                                   | 2.184                                            | 2.205                                             | 0.021                         |
| 12                                                   | 2.302                                            | 2.346                                             | 0.044                         |
| 13                                                   | 2.346                                            | 2.366                                             | 0.020                         |
| 14                                                   | 2.477                                            | 2.486                                             | 0.009                         |
| 15                                                   | 2.514                                            | 2.516                                             | 0.002                         |
| 16                                                   | 2.519                                            | 2.532                                             | 0.013                         |
| model ZR-12 (Fig. 6c)                                |                                                  |                                                   |                               |
| 1                                                    | 0.000                                            | 0.028                                             | 0.028                         |
| 2                                                    | 1.567                                            | 1.737                                             | 0.170                         |
| 3                                                    | 1.801                                            | 1.936                                             | 0.136                         |
| 4                                                    | 1.961                                            | 1.961                                             | 0.0                           |
| 5                                                    | 2.046                                            | 2.046                                             | 0.0                           |
| 6                                                    | 2.075                                            | 2.075                                             | 0.0                           |
| 7                                                    | 2.145                                            | 2.145                                             | 0.0                           |
| 8                                                    | 2.207                                            | 2.348                                             | 0.141                         |
| <b>9</b>                                             | <b>2.348</b>                                     | <b>2.577</b>                                      | <b>0.229</b>                  |
| 10                                                   | 2.610                                            | 2.610                                             | 0.0                           |
| 11                                                   | 2.749                                            | 2.749                                             | 0.0                           |
| 12                                                   | 2.770                                            | 2.826                                             | 0.056                         |
| 13                                                   | 2.826                                            | 2.830                                             | 0.004                         |
| 14                                                   | 2.830                                            | 2.833                                             | 0.003                         |
| 15                                                   | 2.833                                            | 2.846                                             | 0.013                         |
| 16                                                   | 2.846                                            | 2.847                                             | 0.001                         |

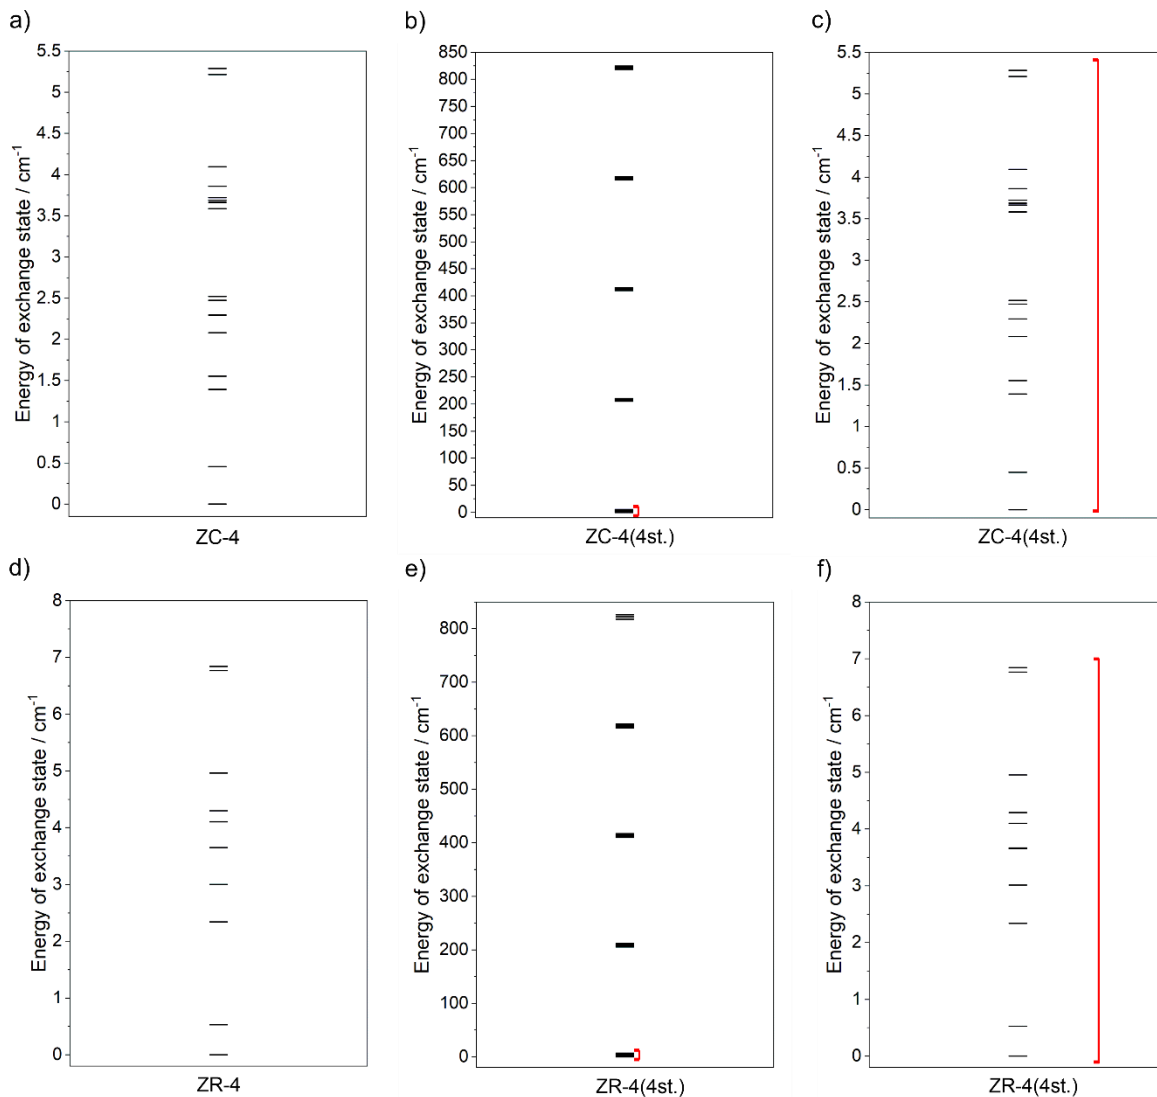

**Fig. S26** The scheme of exchange states for **1** calculated using the results of the *ab initio* calculations (Table S6, Fig. 5–6) combined with the fitting of the exchange constant  $J'$  according to four different theoretical magneto-structural models of a four-membered zig-zag chain (model ZC-4, a, see also Fig. S21), a four-membered zig-zag chain with the extended set of employed *ab initio* energy states of Co centres to four higher-lying states (model ZC-4(4st.), b–c, see also Fig. S21), a four-membered zig-zag ring (model ZR-4, d, see also Fig. S21), and a four-membered zig-zag ring with the extended set of employed *ab initio* energy states of Co centres to four higher-lying states (model ZR-4(4st.), e–f, see also Fig. S21). The (a), (b), (d), and (e) parts show the full calculated pattern of exchange states while the (c) and (f) parts represent the enlarged view on the lowest energy regions within the indicated model.

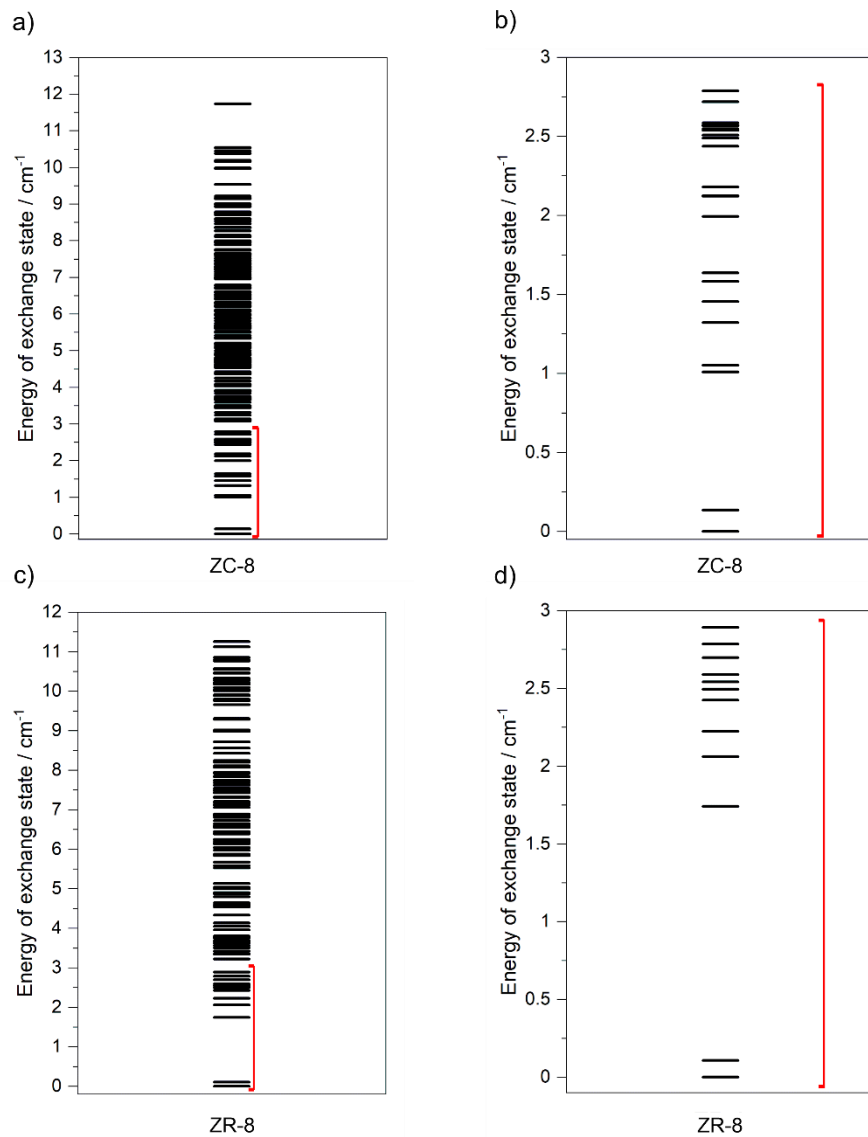

**Fig. S27** The scheme of exchange states for **1** calculated using the results of the *ab initio* calculations (Table S6, Fig. 5–6) combined with the fitting of the exchange constant  $J'$  according to two different theoretical magneto-structural models of an eight-membered zig-zag chain (model ZC-8, a–b, see also Fig. S21) and an eight-membered zig-zag ring (model ZR-8, c–d, see also Fig. S21). The (a) and (c) parts show the full calculated pattern of exchange states while the (b) and (d) parts represent the enlarged view on the lowest energy regions within the indicated model.

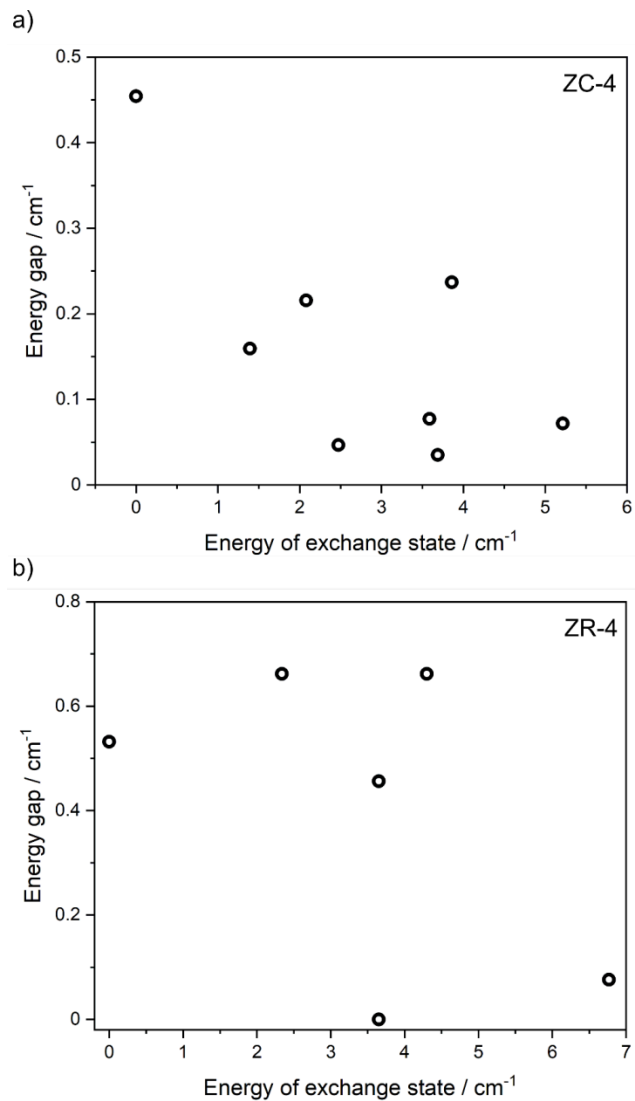

**Fig. S28** The dependence between the average energy of the pairs of exchange states (pseudo-doublets) and the related energy gaps determined for **1** using the *ab initio* calculations combined with the fitting of the exchange constant according to two magneto-structural models, named ZC-4 (a) and ZR-4 (b). The models are visualized in Fig. S21 while the numerical data for the obtained exchange states are gathered in Table S13.



**Table S13** The selected parameters obtained from modelling the magnetic properties of **1** based on the results of the *ab initio* calculations combined with the fitting of the exchange constant  $J'$  according to two magneto-structural models, named ZC-4 and ZR-4 (Fig. S21). The presented results include the lists of 16 lowest lying exchange states (8 lowest lying pairs of exchange states, pseudo-doublets) and the respective energy gaps. The lowest lying pairs of states showing the relatively large energy gaps are emphasized by bold fonts.

| No. of the pair of exchange states (pseudo-doublets) | Energy of a lower lying state / $\text{cm}^{-1}$ | Energy of a higher lying state / $\text{cm}^{-1}$ | Energy gap / $\text{cm}^{-1}$ |
|------------------------------------------------------|--------------------------------------------------|---------------------------------------------------|-------------------------------|
| model ZC-4 (Fig. S21a)                               |                                                  |                                                   |                               |
| <b>1</b>                                             | <b>0.000</b>                                     | <b>0.454</b>                                      | <b>0.454</b>                  |
| 2                                                    | 1.392                                            | 1.551                                             | 0.159                         |
| 3                                                    | 2.08                                             | 2.295                                             | 0.215                         |
| 4                                                    | 2.474                                            | 2.521                                             | 0.047                         |
| 5                                                    | 3.586                                            | 3.664                                             | 0.078                         |
| 6                                                    | 3.688                                            | 3.722                                             | 0.034                         |
| 7                                                    | 3.859                                            | 4.096                                             | 0.237                         |
| 8                                                    | 5.215                                            | 5.287                                             | 0.072                         |
| model ZR-4 (Fig. S21b)                               |                                                  |                                                   |                               |
| 1                                                    | 0.000                                            | 0.532                                             | 0.532                         |
| <b>2</b>                                             | <b>2.338</b>                                     | <b>3.000</b>                                      | <b>0.662</b>                  |
| 3                                                    | 3.650                                            | 3.650                                             | 0.000                         |
| 4                                                    | 3.650                                            | 3.650                                             | 0.000                         |
| 5                                                    | 3.650                                            | 3.650                                             | 0.000                         |
| 6                                                    | 3.650                                            | 4.106                                             | 0.456                         |
| <b>7</b>                                             | <b>4.299</b>                                     | <b>4.961</b>                                      | <b>0.662</b>                  |
| 8                                                    | 6.767                                            | 6.843                                             | 0.076                         |

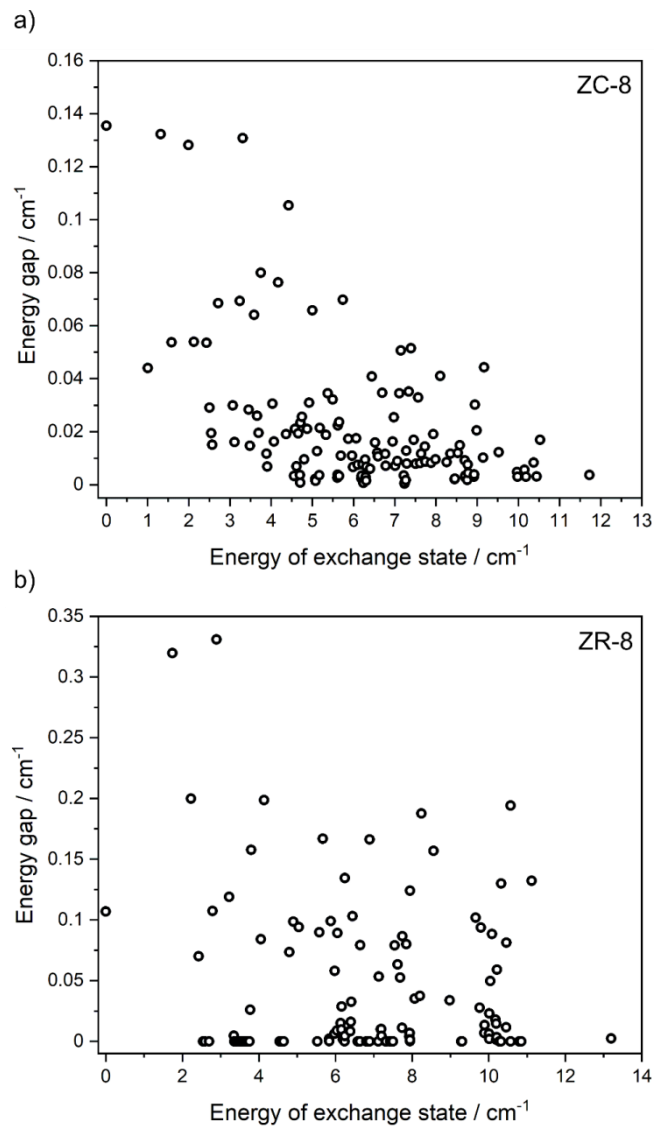

**Fig. S29** The dependence between the average energy of the pairs of exchange states (pseudo-doublets) and the related energy gaps determined for **1** using the *ab initio* calculations combined with the fitting of the exchange constant according to two magneto-structural models, named ZC-8 (a) and ZR-8 (b). The models are visualized in Fig. S21 while the numerical data for the obtained exchange states are gathered in Tables S14.

**Table S14** The selected parameters obtained from modelling the magnetic properties of **1** based on the results of the *ab initio* calculations combined with the fitting of the exchange constant  $J'$  according to two magneto-structural models, named ZC-8 and ZR-8 (Fig. S21). The presented results include the lists of 32 lowest lying exchange states (16 lowest lying pairs of exchange states, pseudo-doublets) and the respective energy gaps. The further, higher lying states are visualized in Fig. S27 and S29. The lowest lying pairs of states showing the relatively large energy gaps are emphasized by bold fonts.

| No. of the pair of exchange states (pseudo-doublets) | Energy of a lower lying state / $\text{cm}^{-1}$ | Energy of a higher lying state / $\text{cm}^{-1}$ | Energy gap / $\text{cm}^{-1}$ |
|------------------------------------------------------|--------------------------------------------------|---------------------------------------------------|-------------------------------|
| model ZC-8 (Fig. S21c)                               |                                                  |                                                   |                               |
| <b>1</b>                                             | <b>0.000</b>                                     | <b>0.135</b>                                      | <b>0.135</b>                  |
| 2                                                    | 1.008                                            | 1.052                                             | 0.044                         |
| 3                                                    | 1.322                                            | 1.454                                             | 0.132                         |
| 4                                                    | 1.582                                            | 1.635                                             | 0.053                         |
| 5                                                    | 1.993                                            | 2.121                                             | 0.128                         |
| 6                                                    | 2.125                                            | 2.179                                             | 0.054                         |
| 7                                                    | 2.436                                            | 2.489                                             | 0.053                         |
| 8                                                    | 2.508                                            | 2.537                                             | 0.029                         |
| 9                                                    | 2.548                                            | 2.567                                             | 0.019                         |
| 10                                                   | 2.571                                            | 2.586                                             | 0.015                         |
| 11                                                   | 2.718                                            | 2.787                                             | 0.069                         |
| 12                                                   | 3.072                                            | 3.102                                             | 0.030                         |
| 13                                                   | 3.115                                            | 3.131                                             | 0.016                         |
| 14                                                   | 3.241                                            | 3.31                                              | 0.070                         |
| 15                                                   | 3.312                                            | 3.442                                             | 0.130                         |
| 16                                                   | 3.457                                            | 3.485                                             | 0.028                         |
| model ZR-8 (Fig. S21d)                               |                                                  |                                                   |                               |
| 1                                                    | 0.000                                            | 0.107                                             | 0.107                         |
| 2                                                    | 1.742                                            | 2.061                                             | 0.319                         |
| 3                                                    | 2.224                                            | 2.424                                             | 0.200                         |
| 4                                                    | 2.424                                            | 2.494                                             | 0.070                         |
| 5                                                    | 2.541                                            | 2.541                                             | 0.000                         |
| 6                                                    | 2.589                                            | 2.589                                             | 0.000                         |
| 7                                                    | 2.697                                            | 2.697                                             | 0.000                         |
| 8                                                    | 2.785                                            | 2.892                                             | 0.107                         |
| <b>9</b>                                             | <b>2.892</b>                                     | <b>3.223</b>                                      | <b>0.331</b>                  |
| 10                                                   | 3.223                                            | 3.342                                             | 0.119                         |
| 11                                                   | 3.342                                            | 3.347                                             | 0.005                         |
| 12                                                   | 3.355                                            | 3.355                                             | 0.0                           |
| 13                                                   | 3.420                                            | 3.420                                             | 0.0                           |
| 14                                                   | 3.502                                            | 3.502                                             | 0.0                           |
| 15                                                   | 3.568                                            | 3.568                                             | 0.0                           |
| 16                                                   | 3.623                                            | 3.623                                             | 0.0                           |

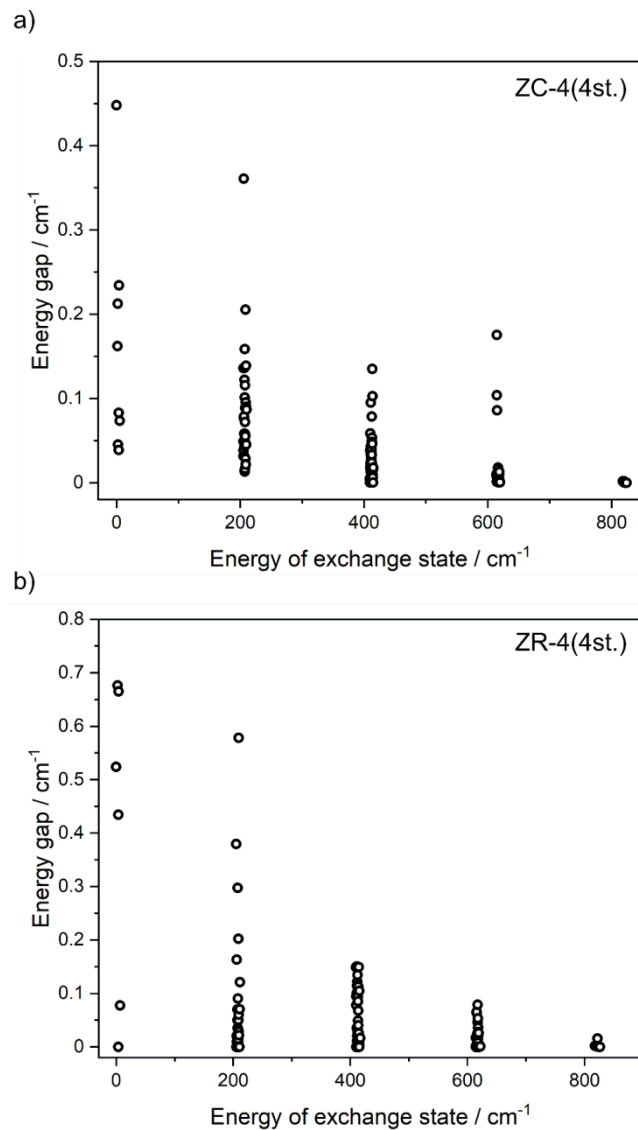

**Fig. S30** The dependence between the average energy of the pairs of exchange states (pseudo-doublets) and the related energy gaps determined for **1** using the *ab initio* calculations combined with the fitting of the exchange constant according to two magneto-structural models, named ZC-4(4st.) (a) and ZR-4(4st.) (b). The models are visualized in Fig. S21 while the numerical data for the obtained exchange states are gathered in Table S15. The labels (4st.) represent the extended calculations employing four higher energy states of each Co centre.

**Table S15** The selected parameters obtained from modelling the magnetic properties of **1** based on the results of the *ab initio* calculations combined with the fitting of the exchange constant  $J'$  according to two magneto-structural models, named ZC-4(4st.) and ZR-4(4st.) (Fig. S21). The presented results include the lists of 32 lowest lying exchange states (16 lowest lying pairs of exchange states, pseudo-doublets) and the respective energy gaps. The further, higher lying states are visualized in Fig. S26 and S30. The lowest lying pairs of states showing the relatively large energy gaps are emphasized by bold fonts. The labels (4st.) represent the extended calculations employing four higher energy states of each Co centre.

| No. of the pair of exchange states (pseudo-doublets) | Energy of a lower lying state / $\text{cm}^{-1}$ | Energy of a higher lying state / $\text{cm}^{-1}$ | Energy gap / $\text{cm}^{-1}$ |
|------------------------------------------------------|--------------------------------------------------|---------------------------------------------------|-------------------------------|
| model ZC-4(4st.) (Fig. S21a)                         |                                                  |                                                   |                               |
| <b>1</b>                                             | <b>0.000</b>                                     | <b>0.448</b>                                      | <b>0.448</b>                  |
| 2                                                    | 1.392                                            | 1.554                                             | 0.162                         |
| 3                                                    | 2.081                                            | 2.294                                             | 0.213                         |
| 4                                                    | 2.472                                            | 2.517                                             | 0.045                         |
| 5                                                    | 3.58                                             | 3.663                                             | 0.083                         |
| 6                                                    | 3.686                                            | 3.725                                             | 0.039                         |
| 7                                                    | 3.859                                            | 4.093                                             | 0.234                         |
| 8                                                    | 5.211                                            | 5.285                                             | 0.074                         |
| 9                                                    | 205.088                                          | 205.224                                           | 0.136                         |
| 10                                                   | 205.342                                          | 205.380                                           | 0.038                         |
| 11                                                   | 205.386                                          | 205.435                                           | 0.049                         |
| 12                                                   | 205.450                                          | 205.481                                           | 0.031                         |
| 13                                                   | 205.491                                          | 205.852                                           | 0.361                         |
| 14                                                   | 205.936                                          | 206.012                                           | 0.076                         |
| 15                                                   | 206.207                                          | 206.286                                           | 0.079                         |
| 16                                                   | 206.537                                          | 206.595                                           | 0.058                         |
| model ZR-4(4st.) (Fig. S21b)                         |                                                  |                                                   |                               |
| 1                                                    | 0.000                                            | 0.524                                             | 0.524                         |
| <b>2</b>                                             | <b>2.338</b>                                     | <b>3.014</b>                                      | <b>0.676</b>                  |
| 3                                                    | 3.653                                            | 3.653                                             | 0.000                         |
| 4                                                    | 3.658                                            | 3.658                                             | 0.000                         |
| 5                                                    | 3.661                                            | 3.661                                             | 0.000                         |
| 6                                                    | 3.667                                            | 4.101                                             | 0.434                         |
| 7                                                    | 4.290                                            | 4.956                                             | 0.666                         |
| 8                                                    | 6.764                                            | 6.842                                             | 0.078                         |
| 9                                                    | 205.261                                          | 205.641                                           | 0.380                         |
| 10                                                   | 205.712                                          | 205.712                                           | 0.000                         |
| 11                                                   | 205.928                                          | 206.091                                           | 0.163                         |
| 12                                                   | 206.091                                          | 206.111                                           | 0.020                         |
| 13                                                   | 206.248                                          | 206.258                                           | 0.010                         |
| 14                                                   | 206.421                                          | 206.421                                           | 0.000                         |
| 15                                                   | 206.550                                          | 206.550                                           | 0.000                         |
| 16                                                   | 207.174                                          | 207.244                                           | 0.070                         |

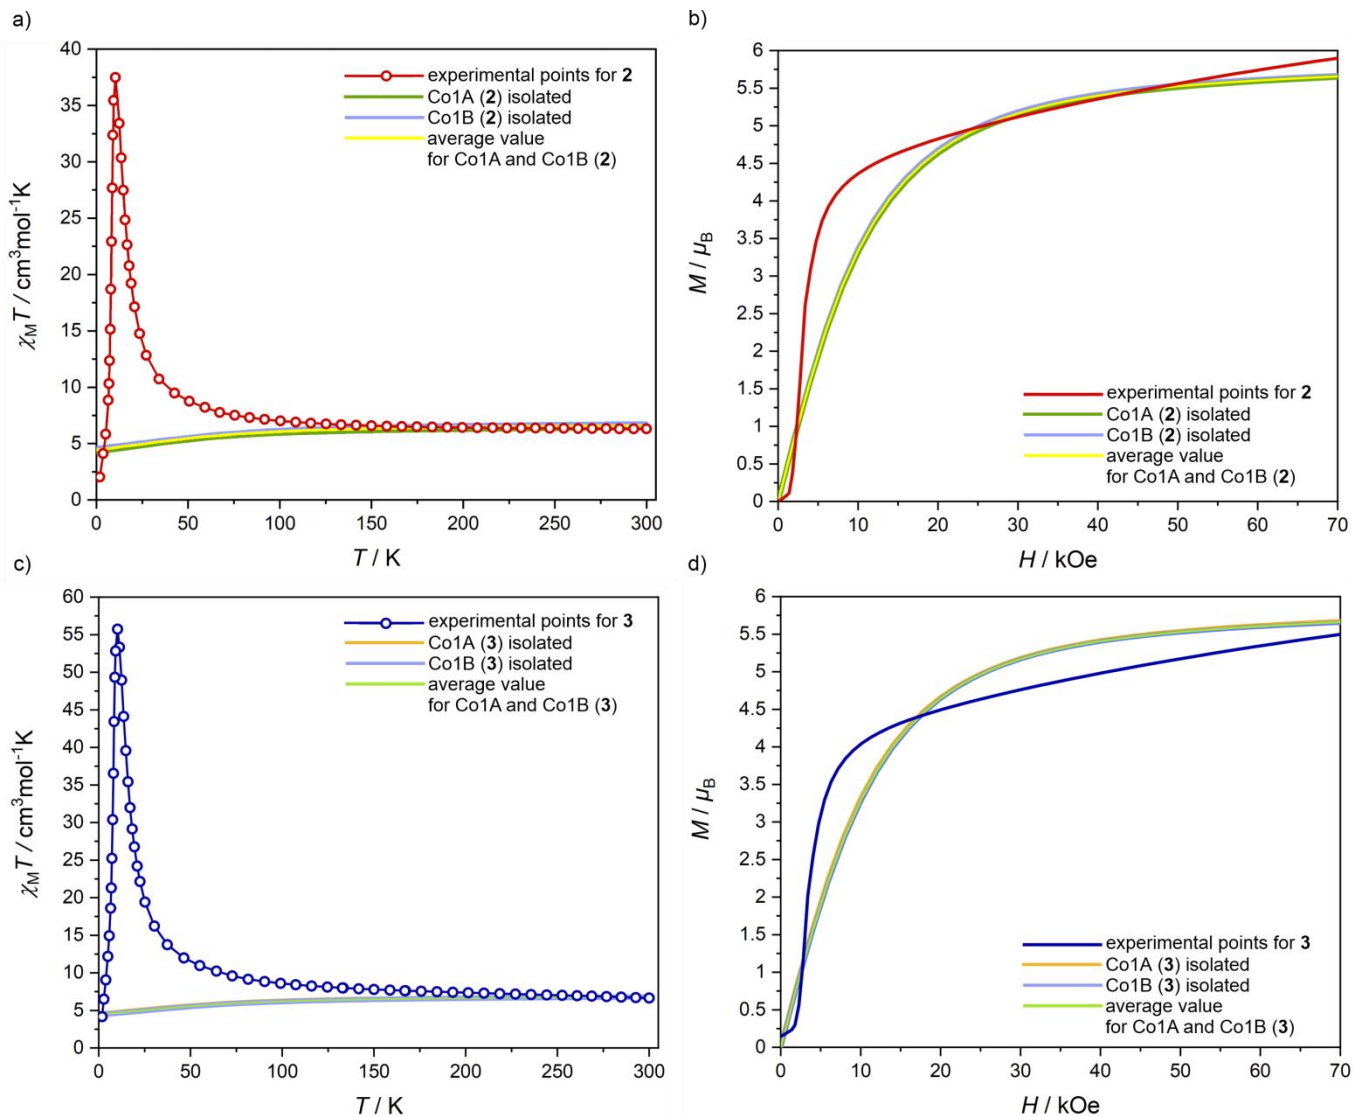

**Fig. S31** Comparison of the experimental *dc* magnetic data for **2** (a, b) and **3** (c, d) with the respective magnetic curves calculated based on the results of the *ab initio* calculations performed for isolated Co centres. The presented comparison includes the experimental temperature dependence of the  $\chi_M T$  product under  $H_{dc} = 1000$  Oe of **2** compared with the  $\chi_M T(T)$  plot calculated for isolated Co1A and Co1B complexes of **2** (Tables S7–S8), together with the average value of the  $\chi_M T$  for Co1A and Co1B (a), the experimental field dependence of the molar magnetization for **2** compared with the molar magnetization curve calculated for isolated Co1A and Co1B complexes of **2**, together with the average value of the molar magnetization for Co1A and Co1B (b), the experimental temperature dependence of the  $\chi_M T$  product under  $H_{dc} = 1000$  Oe of **3** compared with the  $\chi_M T(T)$  plot calculated for isolated Co1A and Co1B complexes of **3** (Tables S9–S10), together with the average value of the  $\chi_M T$  for Co1A and Co1B (c), and the experimental field dependence of the molar magnetization for **3** compared with the molar magnetization calculated for isolated Co1A and Co1B complexes of **3**, together with the average value of the molar magnetization for Co1A and Co1B (d).

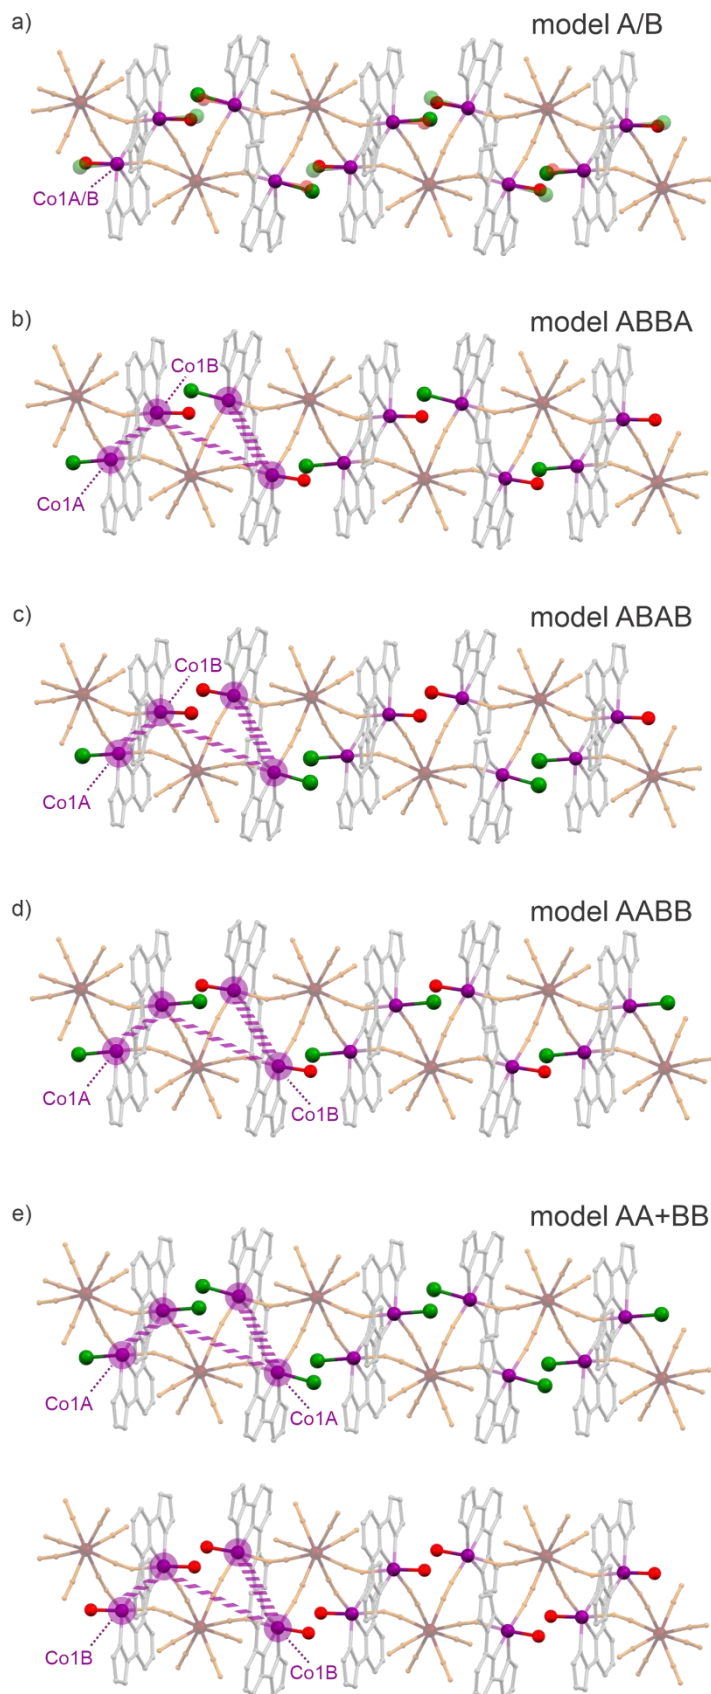

**Fig. S32** The set of possible arrangements of H<sub>2</sub>O and Cl<sup>-</sup> ligands attached to the Co centres within the neighbouring tetrametallic molecular squares of the cyanido-bridged chains of **2** which constitute five magneto-structural models (a–e) that could be considered for the modelling of the magnetic properties, including model A/B (a, partial occupancy of H<sub>2</sub>O and Cl<sup>-</sup> ligands on the same positions, not realizable within the modelling procedure), model ABBA (b, the Co1A/Co1B/Co1B/Co1A sequence of centres), model ABAB (c, the Co1A/Co1B/Co1A/Co1B sequence of centres), model AABB (d, the Co1A/Co1A/Co1B/Co1B sequence of centres), and model AA+BB (e, two co-existing chains with only Co1A and Co1B centres, respectively). The directions of dominant Co–Co magnetic interactions (mediated by W<sup>V</sup> centres) are emphasized by the purple colour. Colour code for selected atoms: purple – Co, red – O, and green – Cl. The analogous arrangements of H<sub>2</sub>O and Br<sup>-</sup> ligands were considered for **3**.

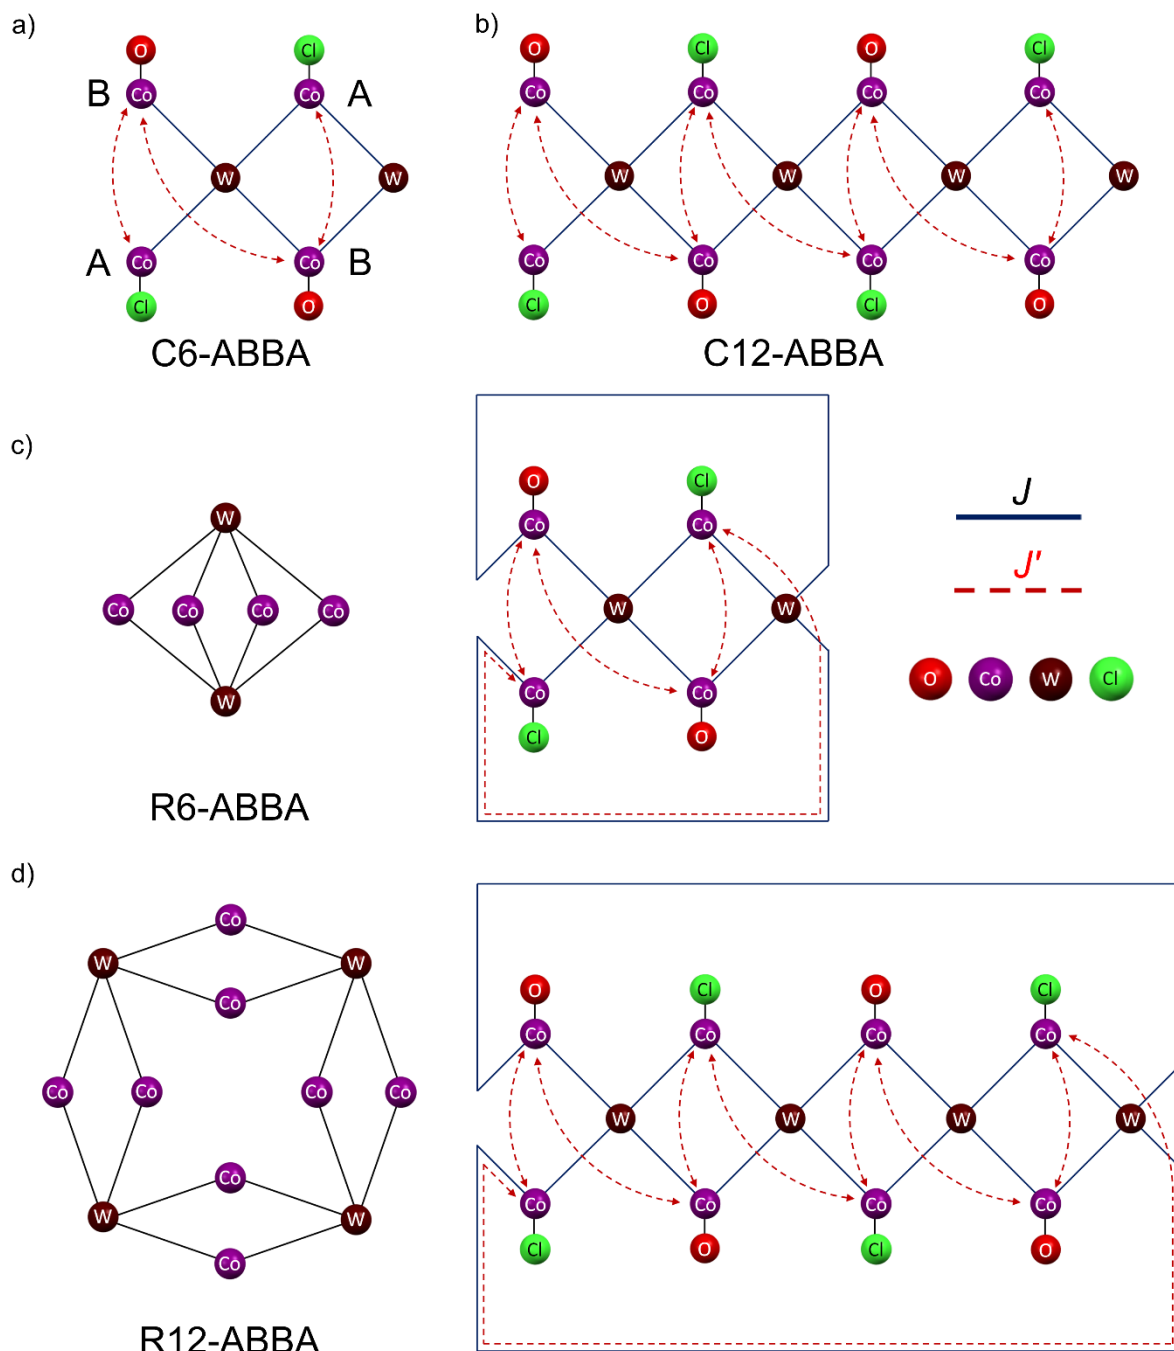

**Fig. S33** Visualization of the ABBA-type models (with the Co1A/Co1B/Co1B/Co1A sequence of Co centres) for the modelling of the magnetic properties of **2**, including a six-membered chain (model C6-ABBA) (a), a twelve-membered chain (model C12-ABBA) (b), a six-membered ring (model R6-ABBA) (c), and a twelve-membered ring (model R12-ABBA) (d). The Co–W magnetic exchange is represented by the  $J$  coupling constant while the Co–Co magnetic interactions are represented by the  $J'$  coupling constant. The analogous ABBA-type models were also considered for compound **3**.



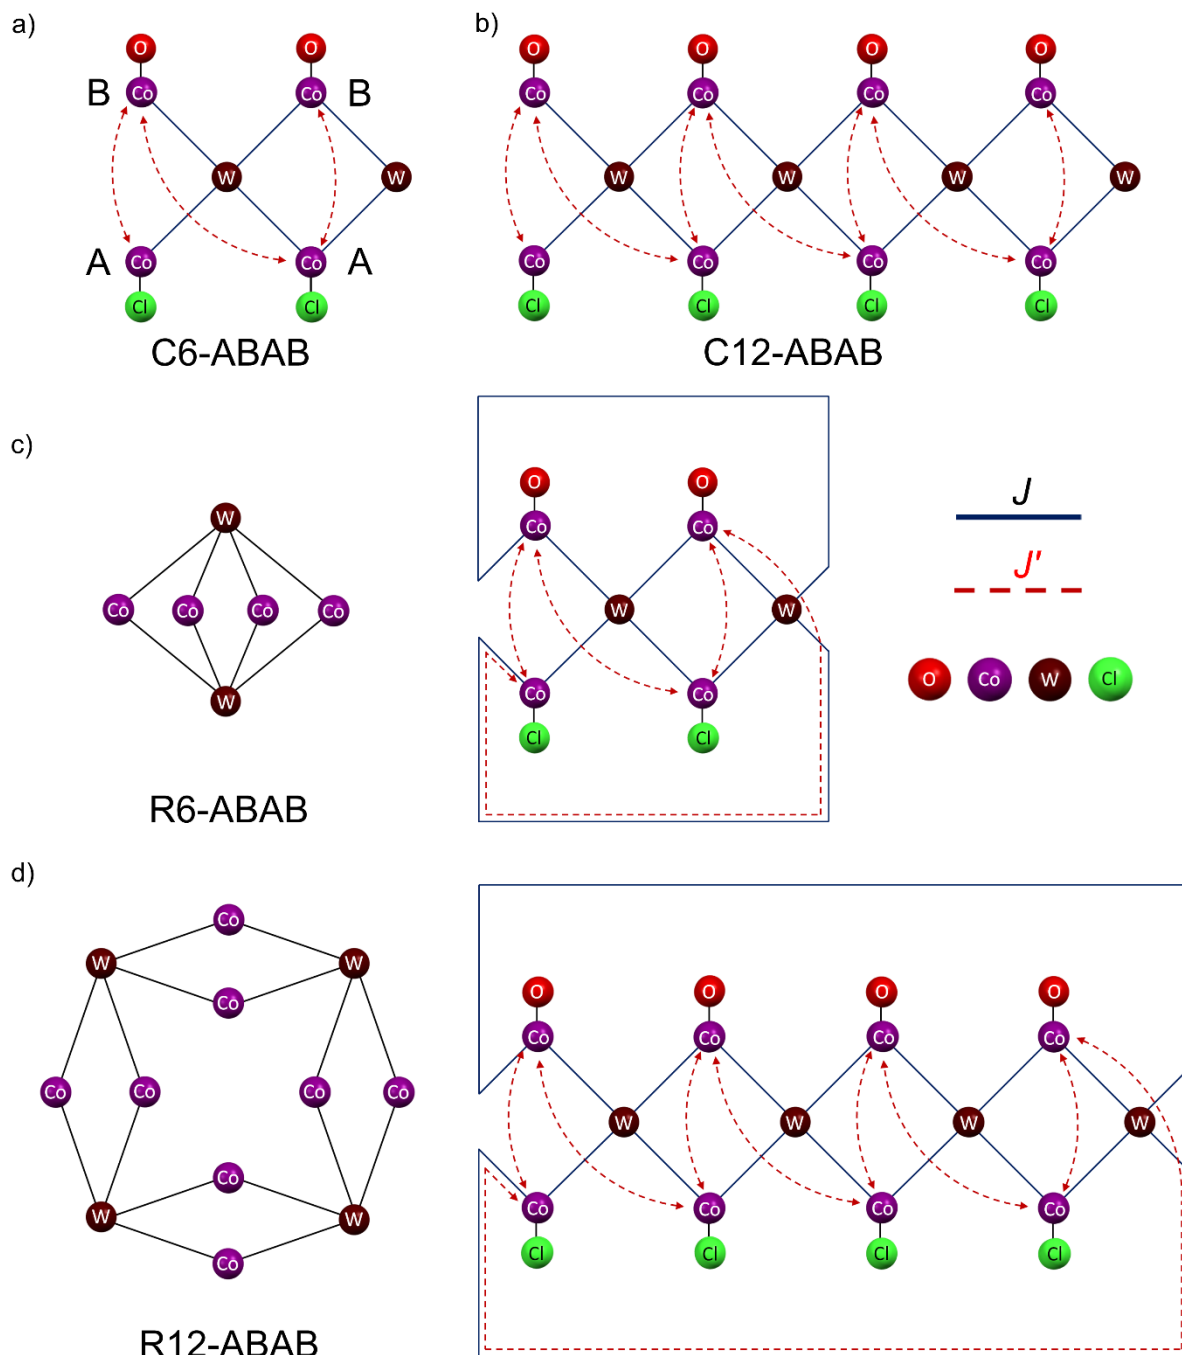

**Fig. S34** Visualization of the ABAB-type models (with the Co1A/Co1B/Co1A/Co1B sequence of Co centres) for the modelling of the magnetic properties of **2**, including a six-membered chain (model C6-ABAB) (a), a twelve-membered chain (model C12-ABAB) (b), a six-membered ring (model R6-ABAB) (c), and a twelve-membered ring (model R12-ABAB) (d). The Co–W magnetic exchange is represented by the  $J$  coupling constant while the Co–Co magnetic interactions are represented by the  $J'$  coupling constant. The analogous ABAB-type models were also considered for compound **3**.

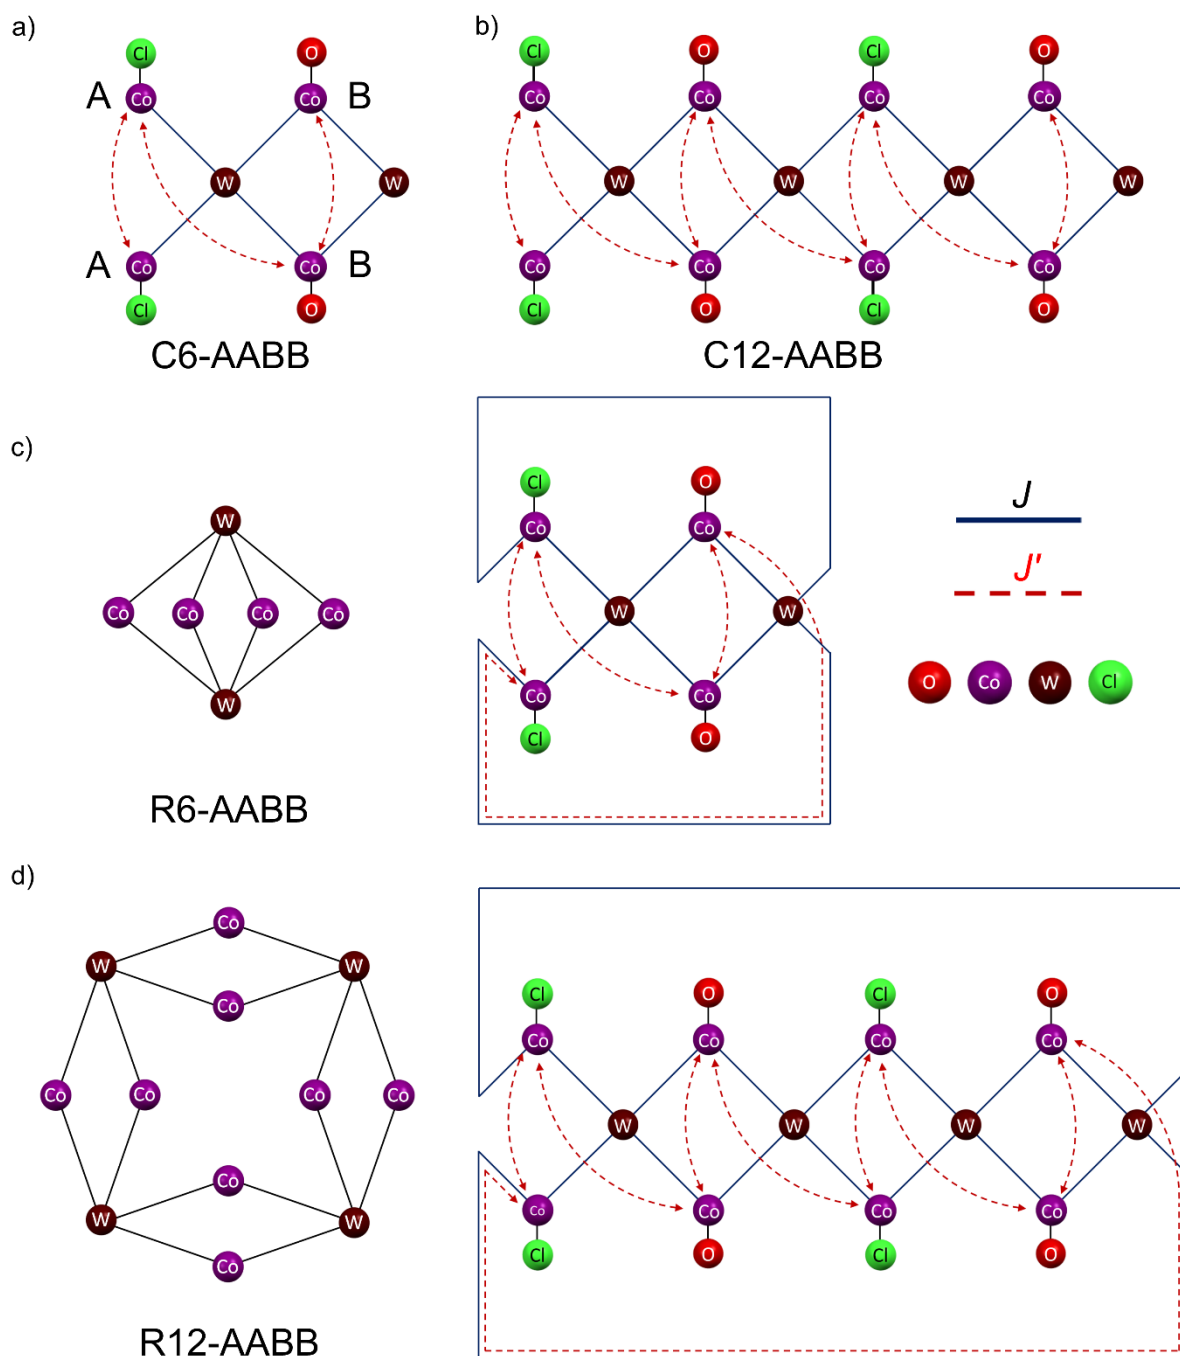

**Fig. S35** Visualization of the AABB-type models (with the Co1A/Co1A/Co1B/Co1B sequence of Co centres) for the modelling of the magnetic properties of **2**, including a six-membered chain (model C6-AABB) (a), a twelve-membered chain (model C12-AABB) (b), a six-membered ring (model R6-AABB) (c), and a twelve-membered ring (model R12-AABB) (d). The Co–W magnetic exchange is represented by the  $J$  coupling constant while the Co–Co magnetic interactions are represented by the  $J'$  coupling constant. The analogous AABB-type models were also considered for compound **3**.

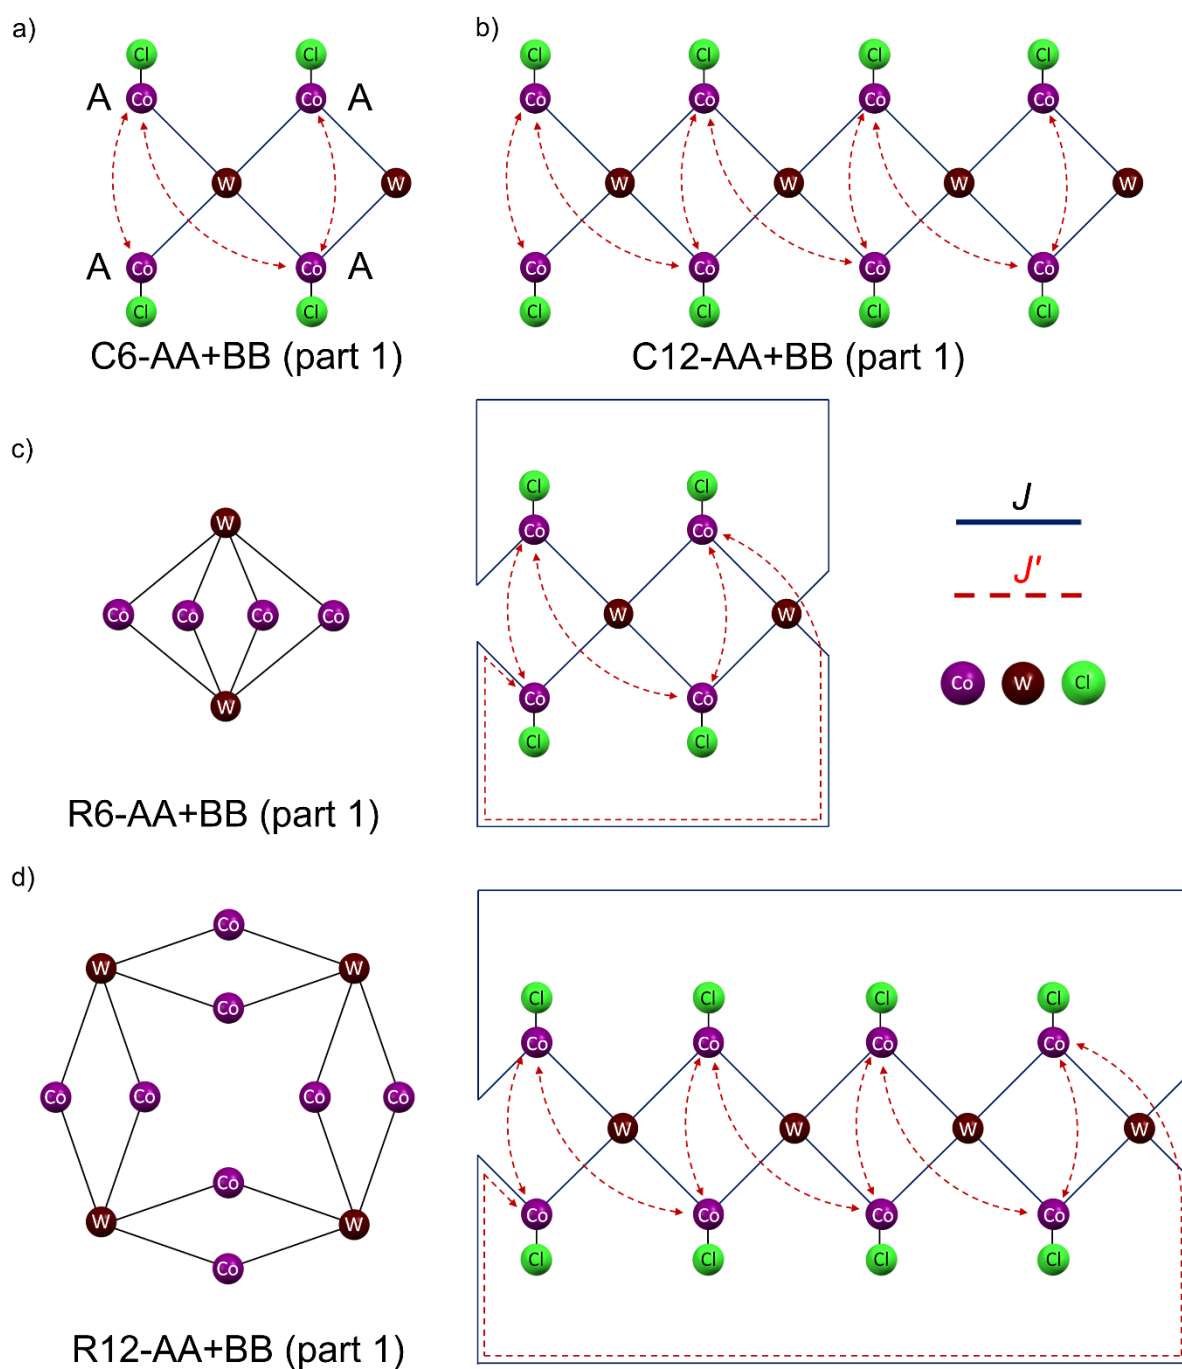

**Fig. S36** Visualization of the (AA+BB)-type models, part 1 (with the separated chains of Co1A and Co1B centres, in the part only the Co1A centres modelling of the magnetic properties of **2**, including a six-membered chain (model C6-AA+BB, part 1) (a), a twelve-membered chain (model C12-AA+BB, part 1) (b), a six-membered ring (model R6-AA+BB, part 1) (c), and a twelve-membered ring (model R12-AA+BB, part 1) (d). The Co–W magnetic exchange is represented by the  $J$  coupling constant while the Co–Co magnetic interactions are represented by the  $J'$  coupling constant. The analogous ABB-type models were also considered for compound **3**. The second part of this model is shown in Fig. S37.

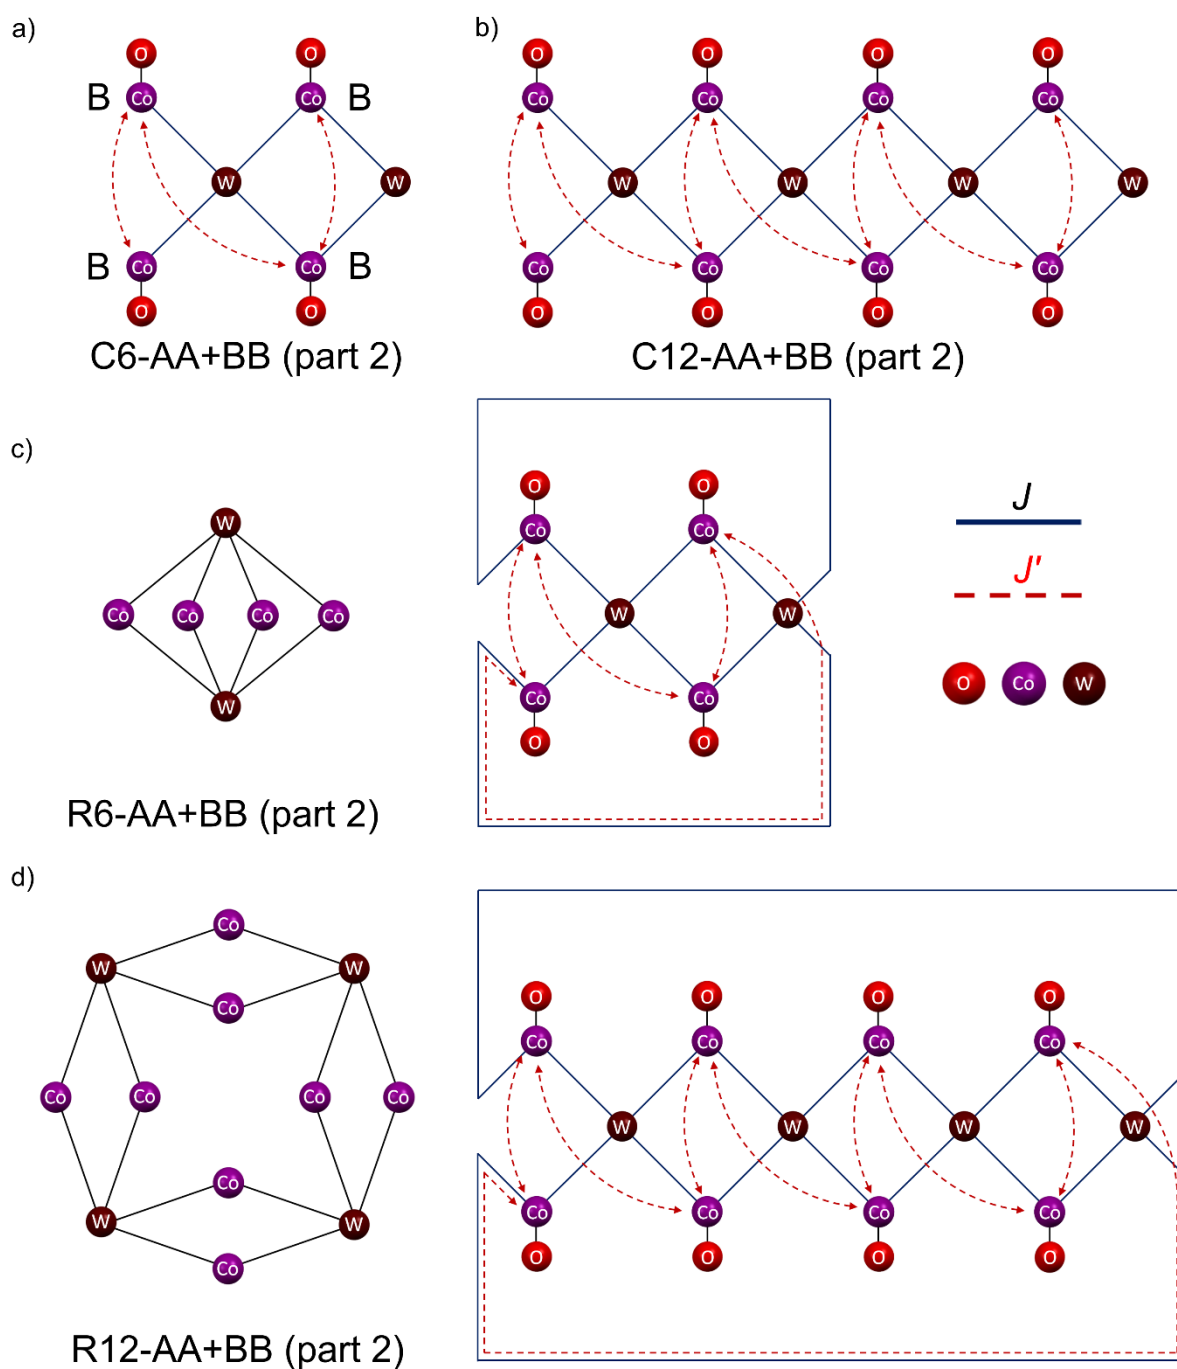

**Fig. S37** Visualization of the (AA+BB)-type models, part 2 (with the separated chains of Co1A and Co1B centres, in the part only the Co1B centres modelling of the magnetic properties of **2**, including a six-membered chain (model C6-AA+BB, part 2) (a), a twelve-membered chain (model C12-AA+BB, part 2) (b), a six-membered ring (model R6-AA+BB, part 2) (c), and a twelve-membered ring (model R12-AA+BB, part 2) (d). The Co–W magnetic exchange is represented by the  $J$  coupling constant while the Co–Co magnetic interactions are represented by the  $J'$  coupling constant. The analogous AAB-type models were also considered for compound **3**. The first part of this model is shown in Fig. S36.

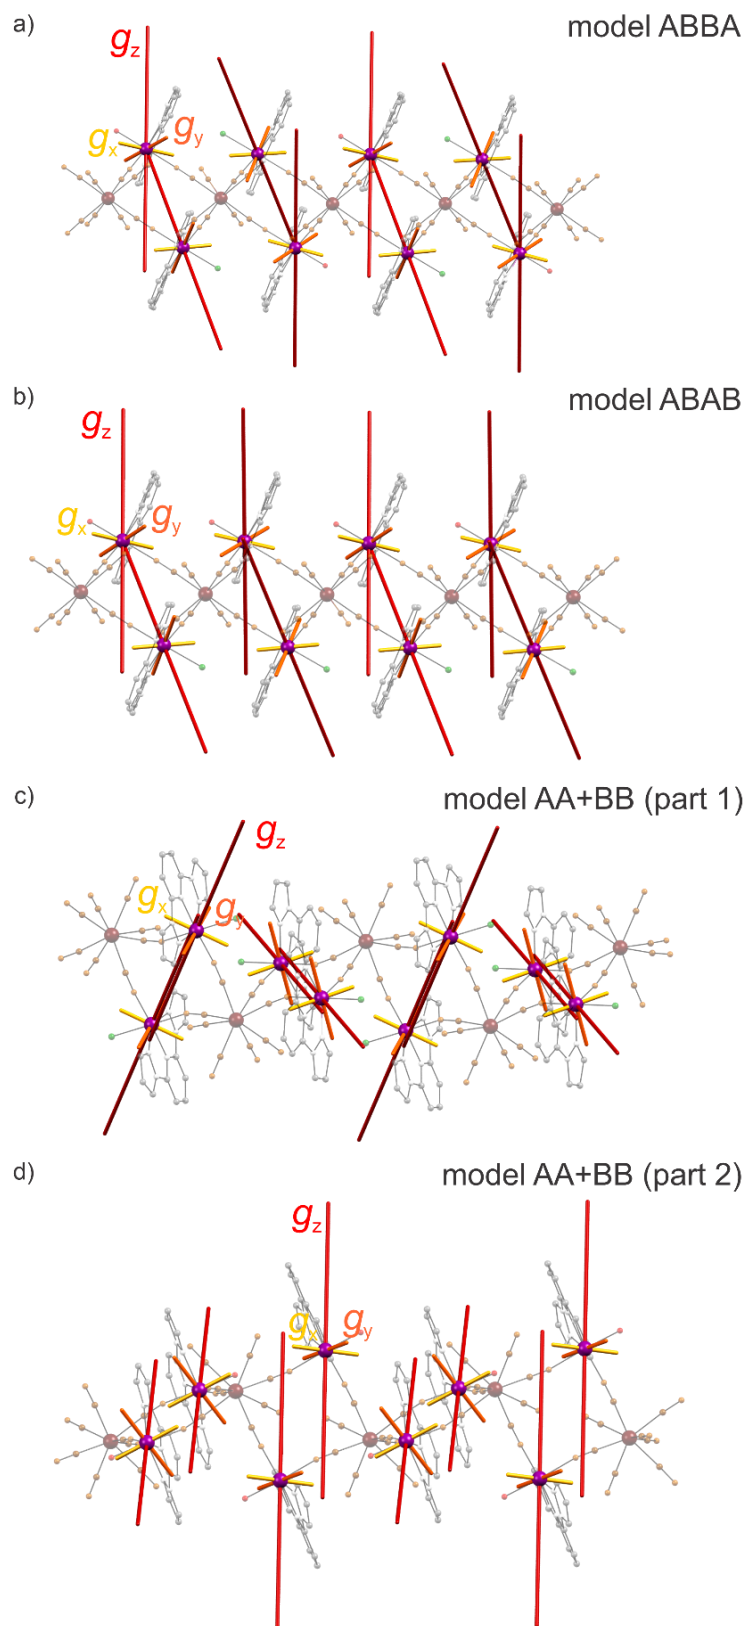

**Fig. S38** The alignment of pseudo- $g$ -tensor components in the chains of **2** within the indicated magneto-structural models of ABBA (a), ABAB (b), AA+BB (part 1) (c, only Co1A centres in the chain), and AA+BB (part 2) (d, only Co1B centres in the chain). The related visualization of the pseudo- $g$ -tensor components for the AABB model is presented in Fig. 7b.

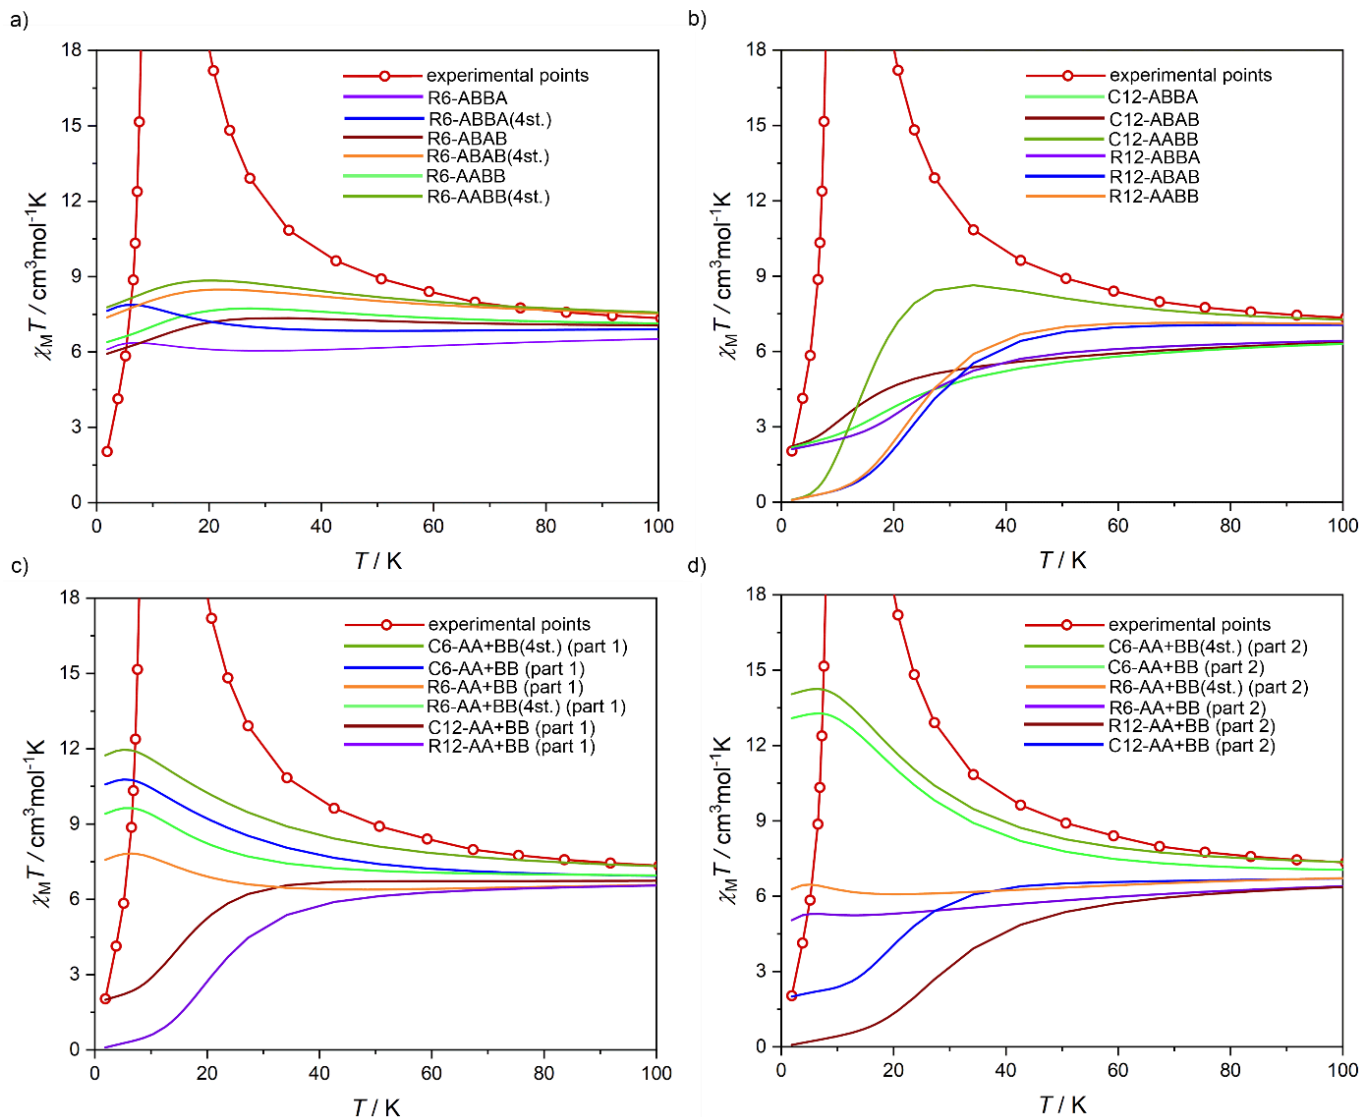

**Fig. S39** Experimental temperature dependence of the  $\chi_M T$  product under  $H_{dc} = 1000$  Oe for **2** compared with the  $\chi_M T(T)$  curves calculated using the results of the *ab initio* calculations combined with the simulations of magnetic exchange employing various R6-type models (R6-ABBA, R6-ABBA(4st.), R6-ABAB, R6-ABAB(4st.), R6-AABB, and R6-AABB(4st.)) (a), various C12- and R12-type models (C12-ABBA, C12-ABAB, C12-AABB, R12-ABBA, R12-ABAB, and R12-AABB) (b), the 1<sup>st</sup> parts of various (AA+BB)-type models (C6-AA+BB(4st.), C6-AA+BB, R6-AA+BB(4st.), R6-AA+BB, C12-AA+BB, and R12-AA+BB) (c), and the 2<sup>nd</sup> parts of various (AA+BB)-type models (C6-AA+BB(4st.), C6-AA+BB, R6-AA+BB(4st.), R6-AA+BB, C12-AA+BB, and R12-AA+BB) (d). The respective results for selected best models were presented in Fig. 7d. All simulations are shown for the best-fit using the  $J$  value of  $25.1 \text{ cm}^{-1}$  and the  $J'$  of  $-0.6 \text{ cm}^{-1}$  taken from the modelling of the magnetic properties of **1** (Fig. 6). The extension (4st.) used for the part of the presented models represent the extended calculations employing four higher lying energy states of each Co centre while only the lowest ones are used for all other calculations.

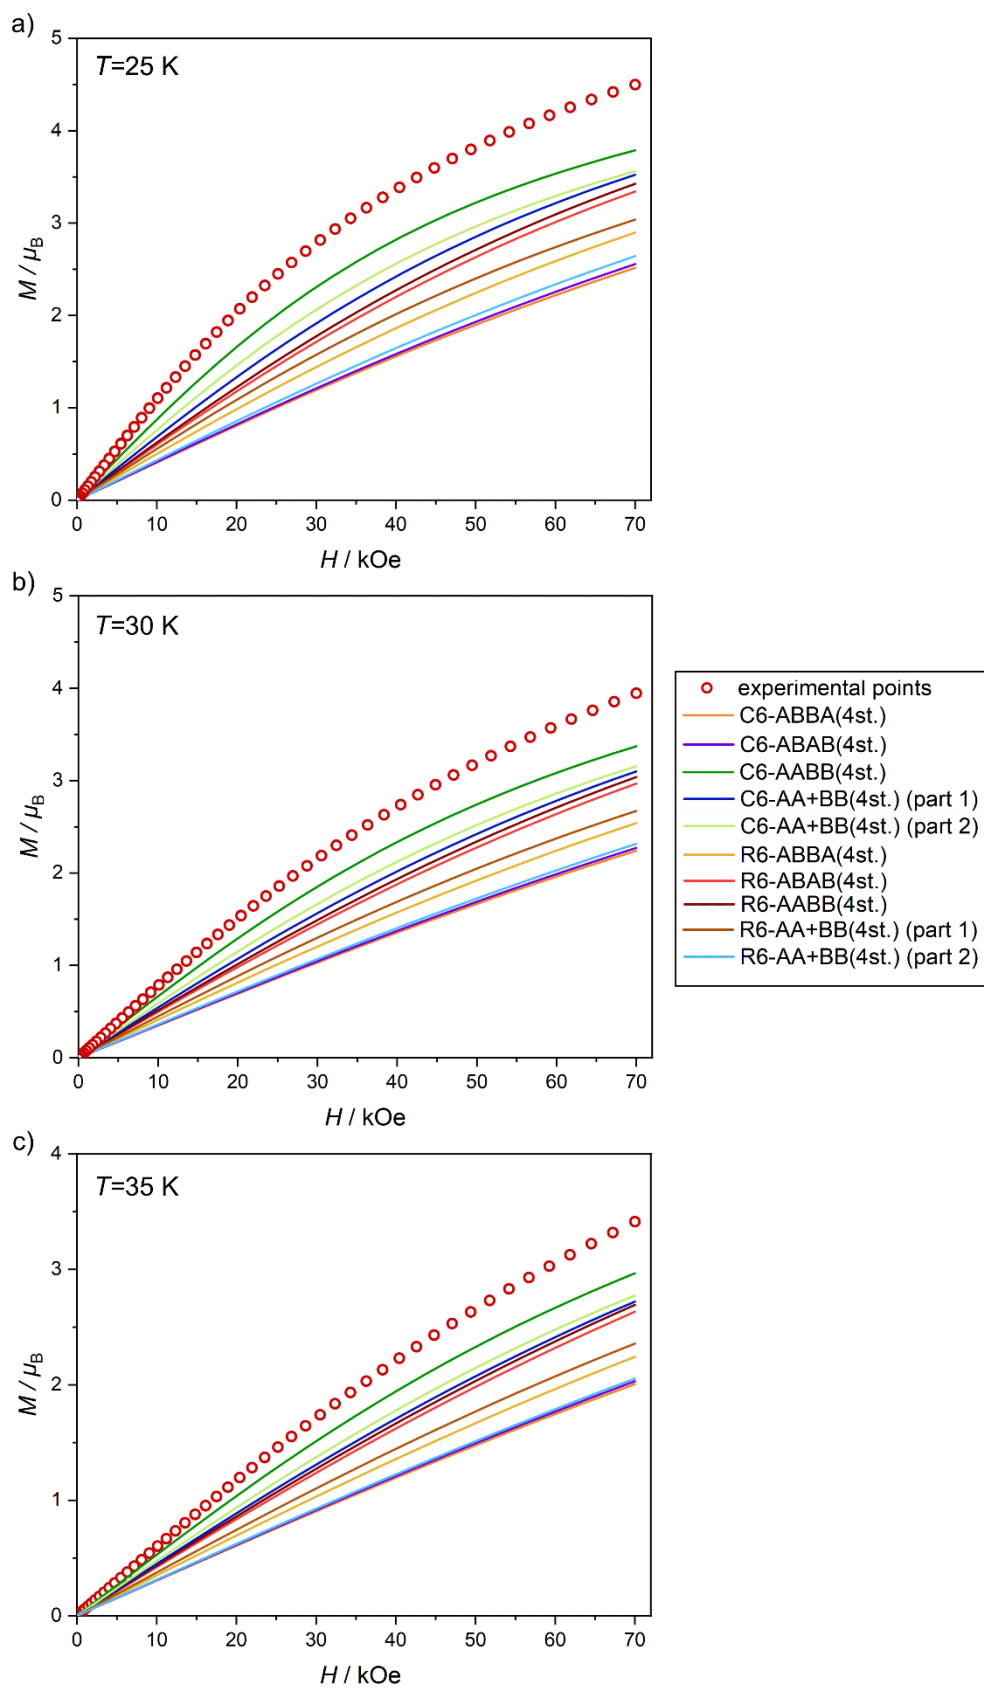

**Fig. S40** Experimental field dependence of the molar magnetization for **2** at the indicated temperatures of 25 K (a), 30 K (b), and 35 K (c) compared with the respective molar magnetization curves calculated using the results of the *ab initio* calculations combined with the simulations of magnetic exchange employing using magneto-structural models, including C6-ABBA(4st.), C6-ABAB(4st.), C6-AABB(4st.), C6-AA+BB(4st.) (part 1), C6-AA+BB(4st.) (part 2), R6-ABBA(4st.), R6-ABAB(4st.), R6-AABB(4st.), R6-AA+BB(4st.) (part 1), and R6-AA+BB(4st.) (part 2).

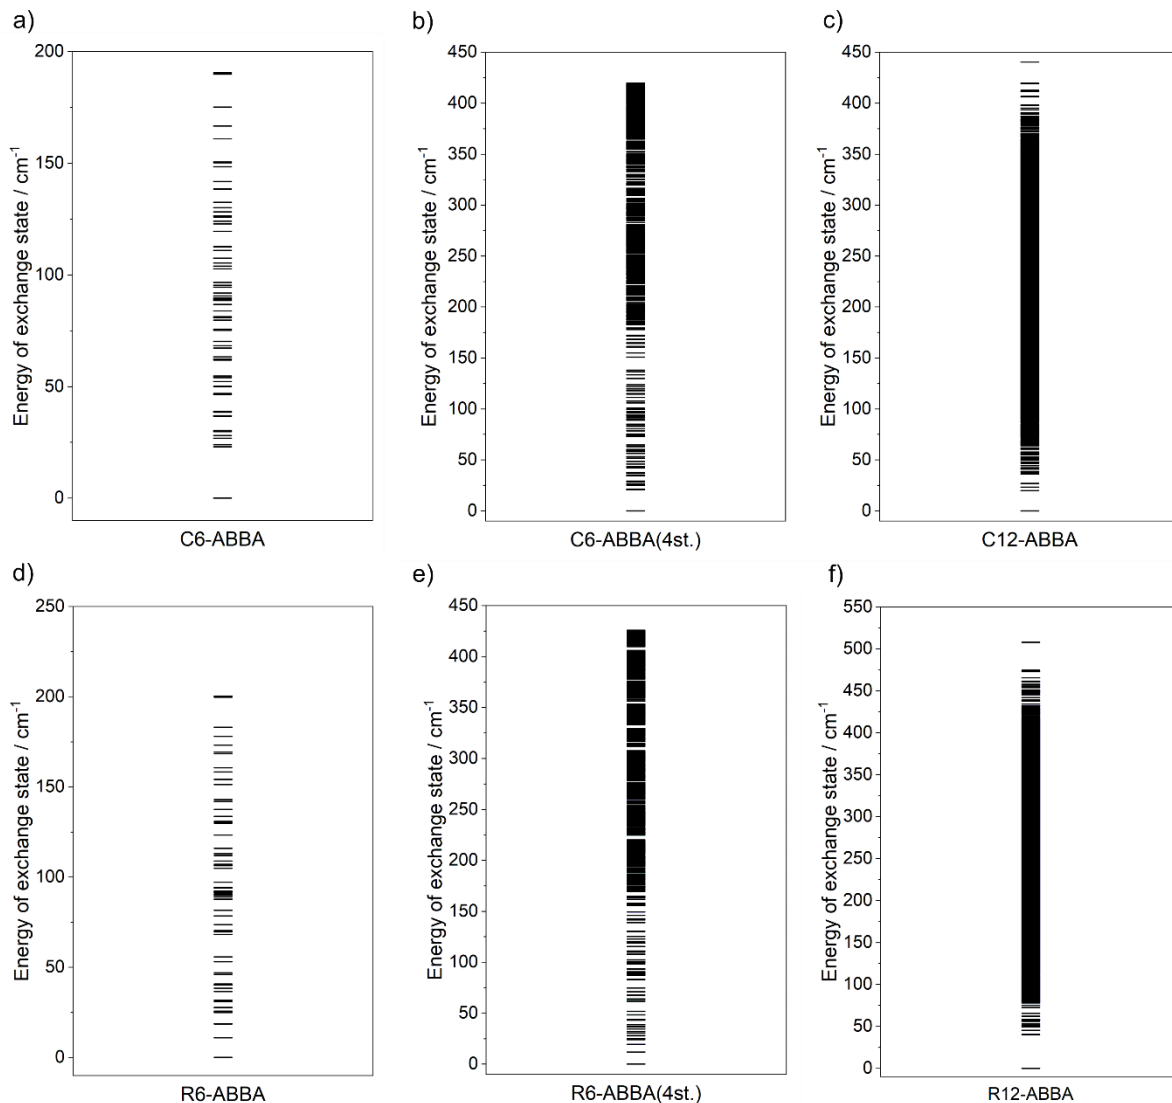

**Fig. S41** The scheme of exchange states for **2** calculated using the results of the *ab initio* calculations (Tables S7–S8, Fig. 5, and Fig. 7) combined with the fitting of the exchange coupling pathways according to six different magneto-structural models of C6-ABBA (a), C6-ABBA(4st.) (b), C12-ABBA (c), R6-ABBA (d), R6-ABBA(4st.) (e), and R12-ABBA (f). The extension (4st.) used for the part of the presented models represent the extended calculations employing four higher lying energy states of each Co centre while only the lowest ones are used for all other calculations. For the visualization of all the indicated models see Fig. S33. The results are for the optimized set of exchange coupling constants of  $J = 25.1 \text{ cm}^{-1}$ ,  $J' = -0.6 \text{ cm}^{-1}$ .



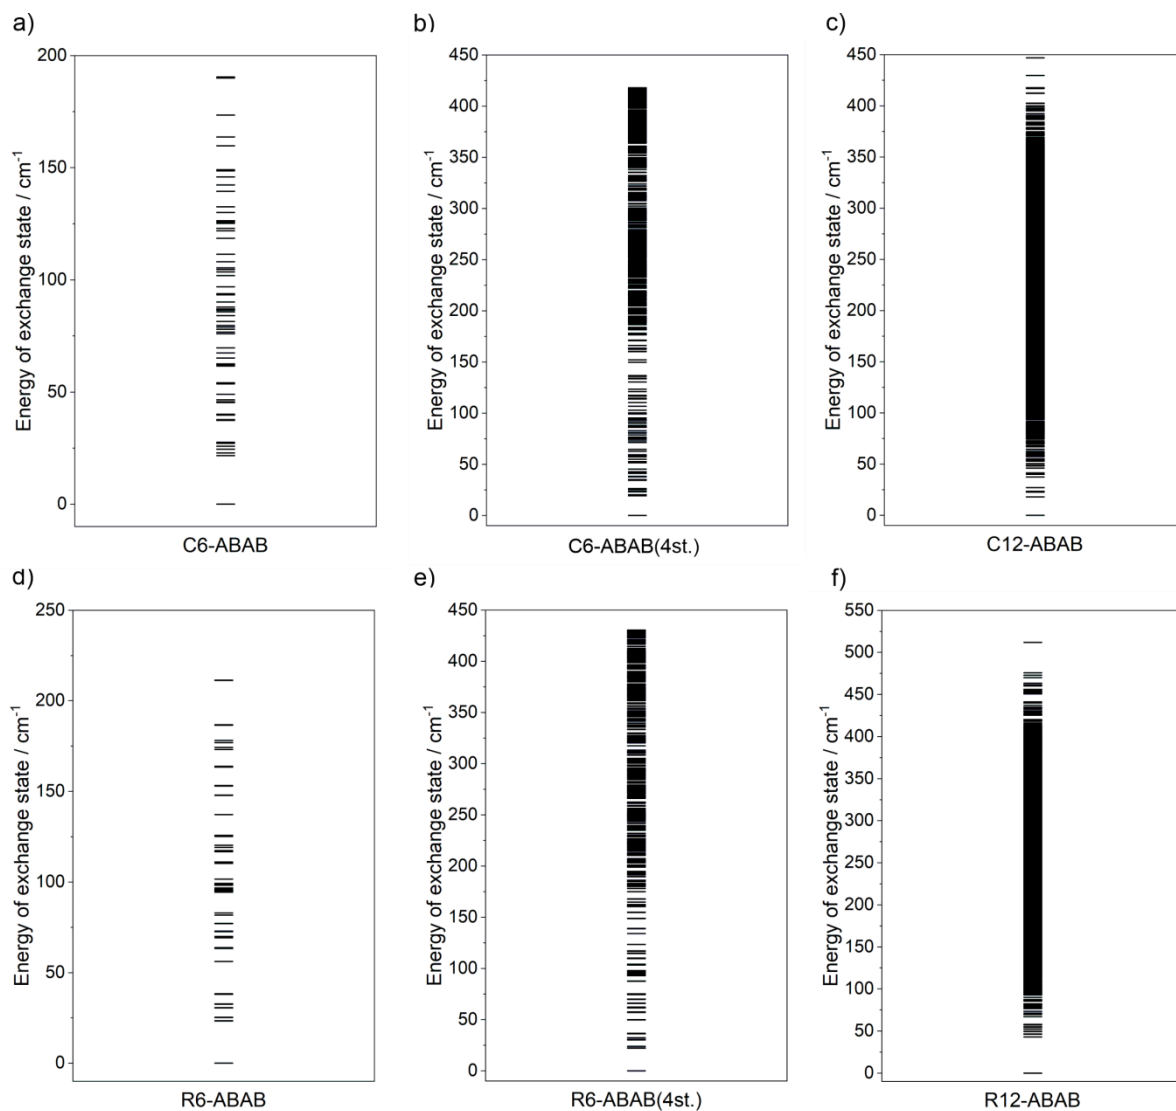

**Fig. S42** The scheme of exchange states for **2** calculated using the results of the *ab initio* calculations (Tables S7–S8, Fig. 5, and Fig. 7) combined with the fitting of the exchange coupling pathways according to six different magneto-structural models of C6-ABAB (a), C6-ABAB(4st.) (b), C12-ABAB (c), R6-ABAB (d), R6-ABAB(4st.) (e), and R12-ABAB (f). The extension (4st.) used for the part of the presented models represent the extended calculations employing four higher lying energy states of each Co centre while only the lowest ones are used for all other calculations. For the visualization of all the indicated models see Fig. S34. The results are for the optimized set of exchange coupling constants of  $J = 25.1 \text{ cm}^{-1}$ ,  $J' = -0.6 \text{ cm}^{-1}$ .

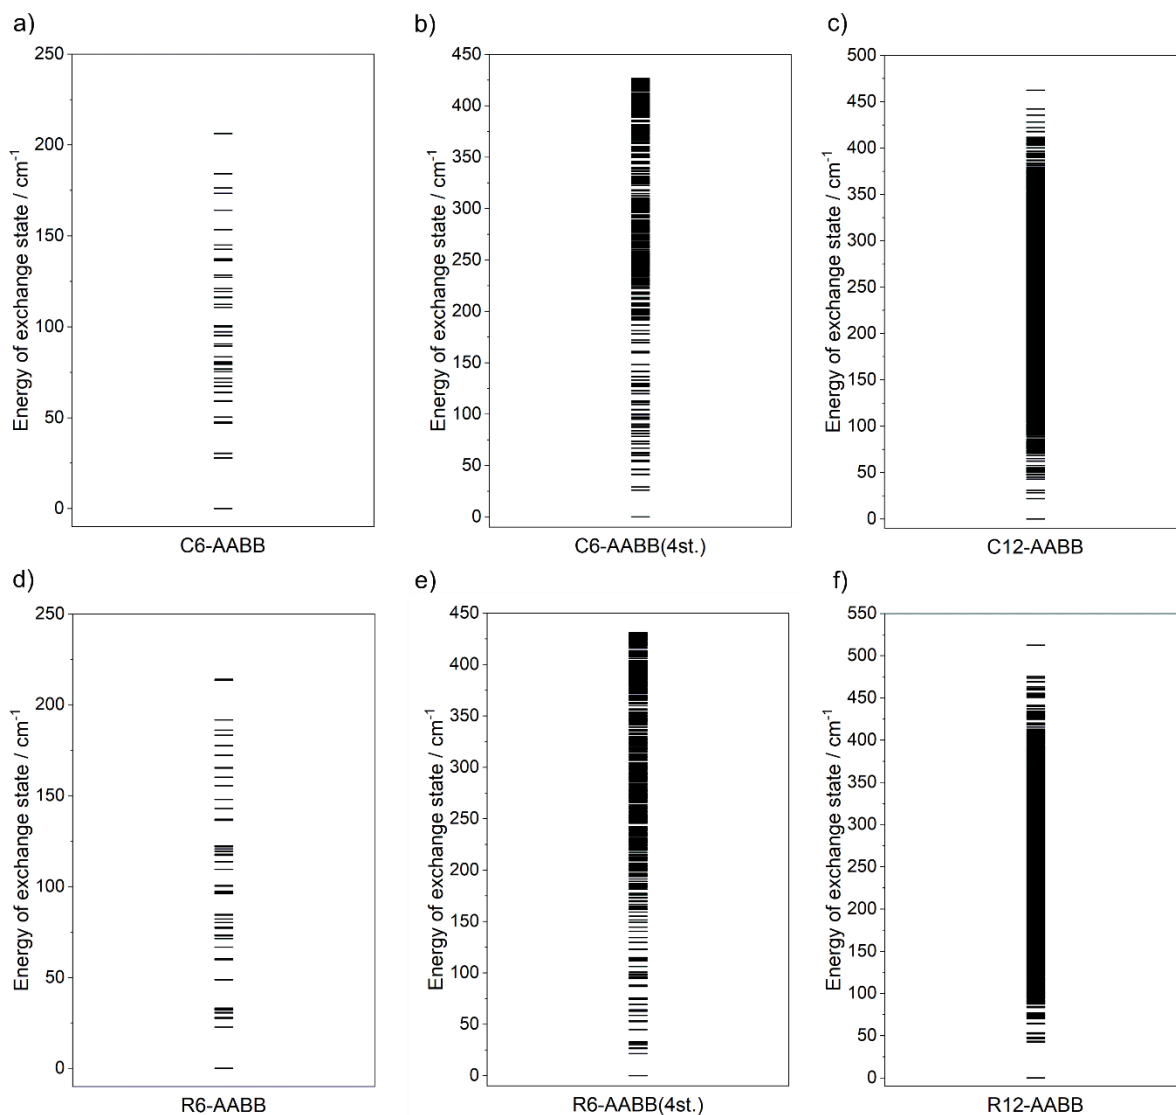

**Fig. S43** The scheme of exchange states for **2** calculated using the results of the *ab initio* calculations (Tables S7–S8, Fig. 5, and Fig. 7) combined with the fitting of the exchange coupling pathways according to six different magneto-structural models of C6-AABB (a), C6-AABB(4st.) (b), C12-AABB (c), R6-AABB (d), R6-AABB(4st.) (e), and R12-AABB (f). The extension (4st.) used for the part of the presented models represent the extended calculations employing four higher lying energy states of each Co centre while only the lowest ones are used for all other calculations. For the visualization of all the indicated models see Fig. S35. The results are for the optimized set of exchange coupling constants of  $J = 25.1 \text{ cm}^{-1}$ ,  $J' = -0.6 \text{ cm}^{-1}$ .

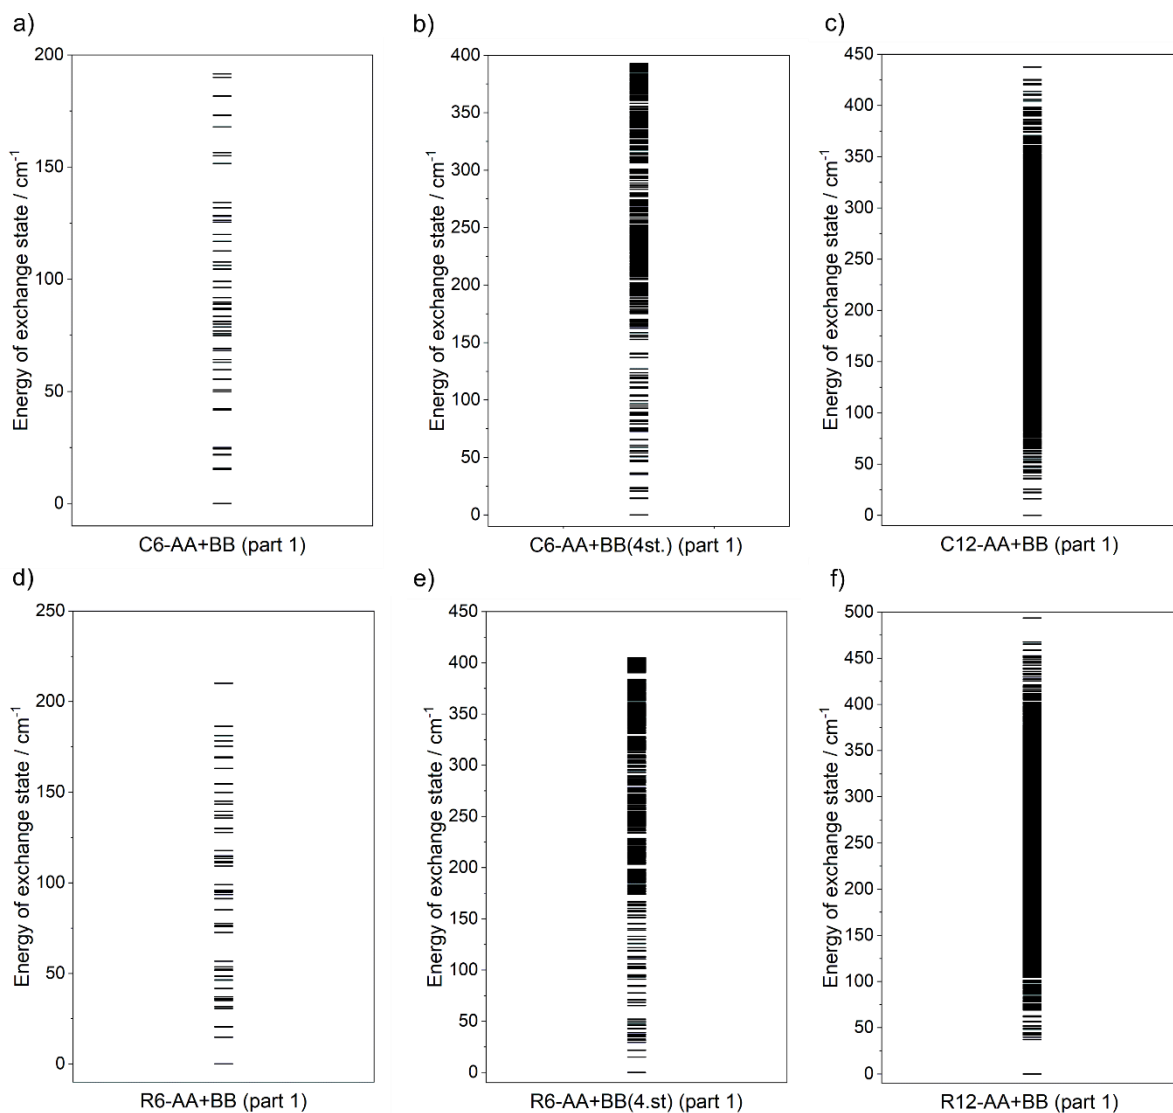

**Fig. S44** The scheme of exchange states for **2** calculated using the results of the *ab initio* calculations (Tables S7–S8, Fig. 5, and Fig. 7) combined with the fitting of the exchange coupling pathways according to six different magneto-structural models of C6-AA+BB (part 1) (a), C6-AA+BB(4st.) (part 1) (b), C12-AA+BB (part 1) (c), R6-AA+BB (part 1) (d), R6-AA+BB(4st.) (part 1) (e), and R12-AA+BB (part 1) (f). The extension (4st.) used for the part of the presented models represent the extended calculations employing four higher lying energy states of each Co centre while only the lowest ones are used for all other calculations. For the visualization of all the indicated models see Fig. S36. The results are for the optimized set of exchange coupling constants of  $J = 25.1 \text{ cm}^{-1}$ ,  $J' = -0.6 \text{ cm}^{-1}$ .

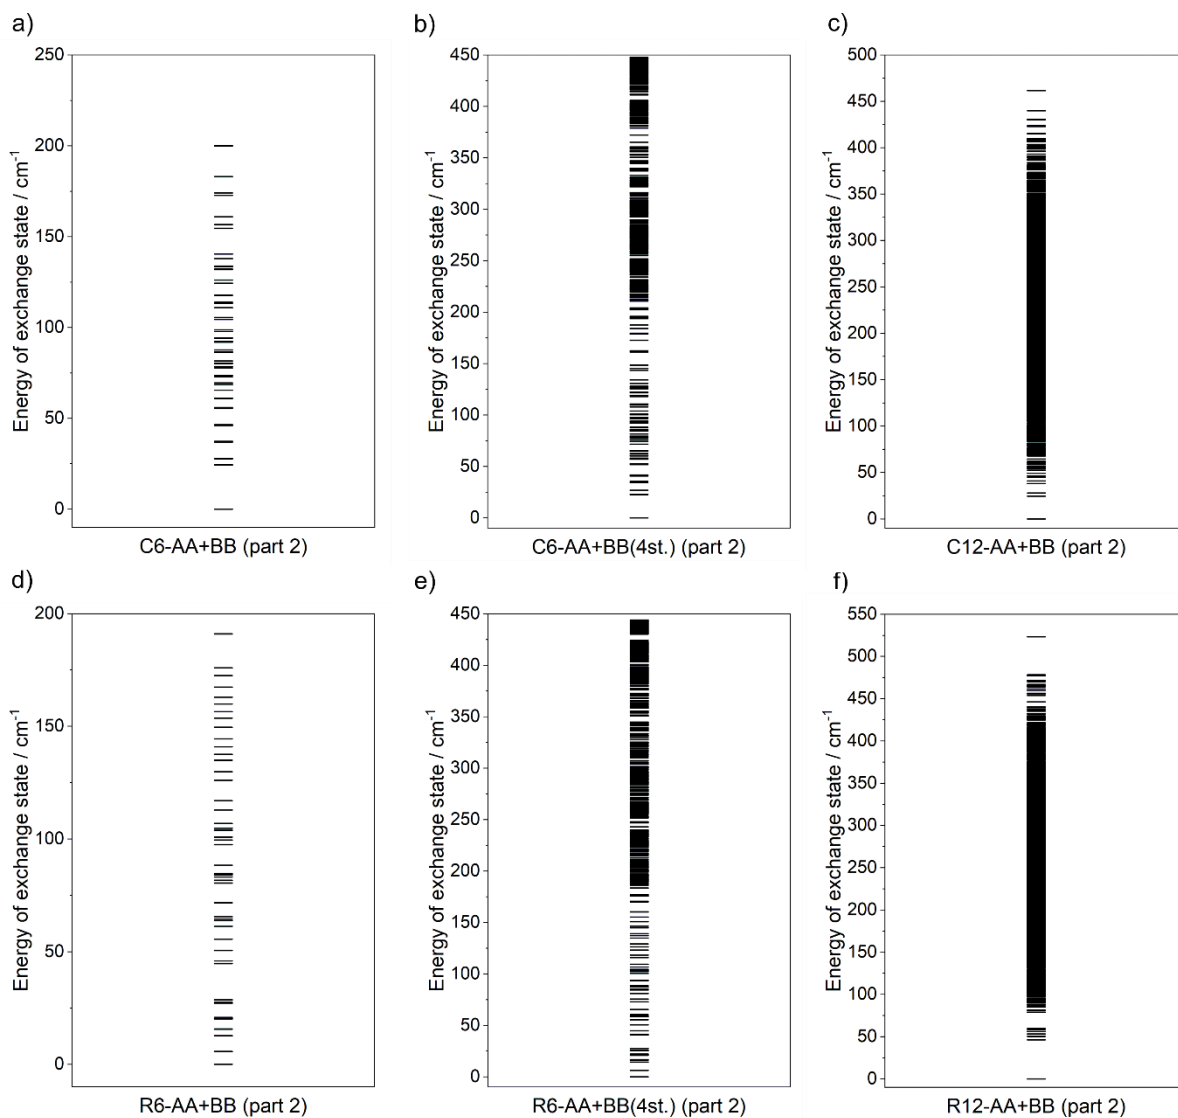

**Fig. S45** The scheme of exchange states for **2** calculated using the results of the *ab initio* calculations (Tables S7–S8, Fig. 5, and Fig. 7) combined with the fitting of the exchange coupling pathways according to six different magneto-structural models of C6-AA+BB (part 2) (a), C6-AA+BB(4st.) (part 2) (b), C12-AA+BB (part 2) (c), R6-AA+BB (part 2) (d), R6-AA+BB(4st.) (part 2) (e), and R12-AA+BB (part 2) (f). The extension (4st.) used for the part of the presented models represent the extended calculations employing four higher lying energy states of each Co centre while only the lowest ones are used for all other calculations. For the visualization of all the indicated models see Fig. S37. The results are for the optimized set of exchange coupling constants of  $J = 25.1 \text{ cm}^{-1}$ ,  $J' = -0.6 \text{ cm}^{-1}$ .

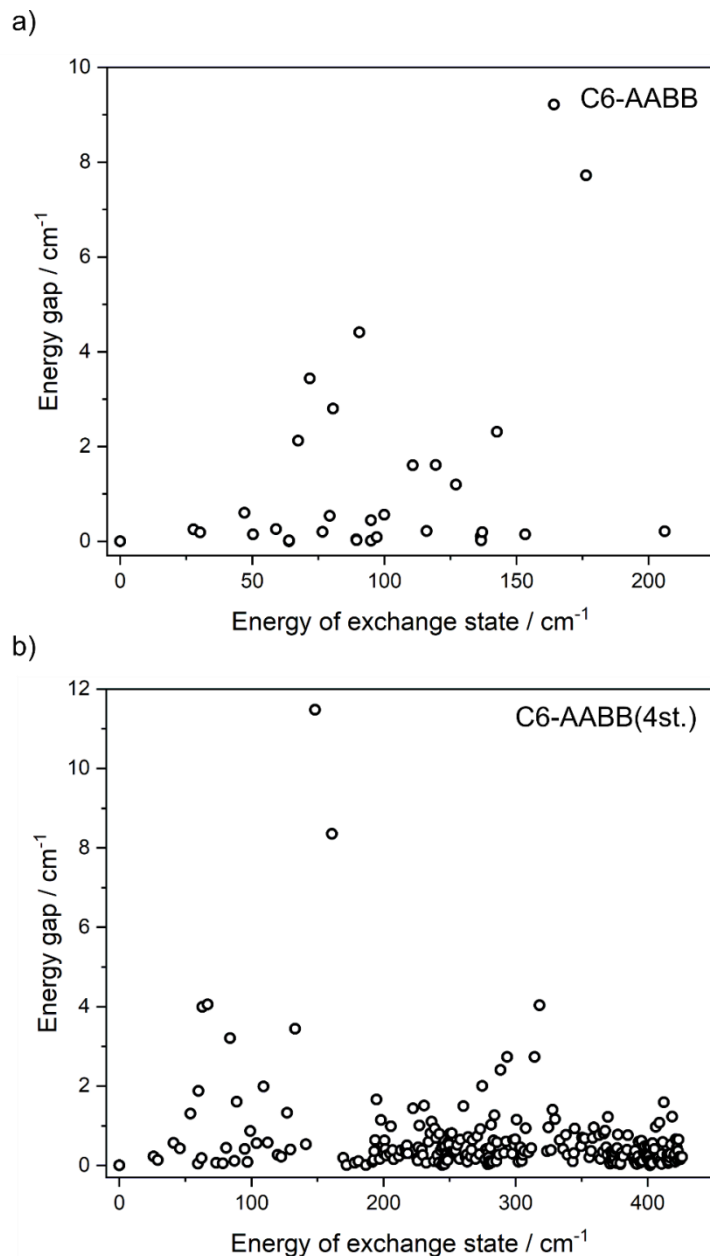

**Fig. S46** The dependence between the average energy of the pairs of exchange states (pseudo-doublets) and the related energy gaps determined for **2** using the *ab initio* calculations combined with the fitting of the exchange constant according to two selected magneto-structural models, named C6-AABB (a) and C6-AABB(4st.) (b) (these models produced the best-fit to the experimental data, see Fig. 7d). The models are visualized in Fig. 7 and Fig. S35 while the numerical data for the obtained exchange states are gathered in Table 3 and Table S20.

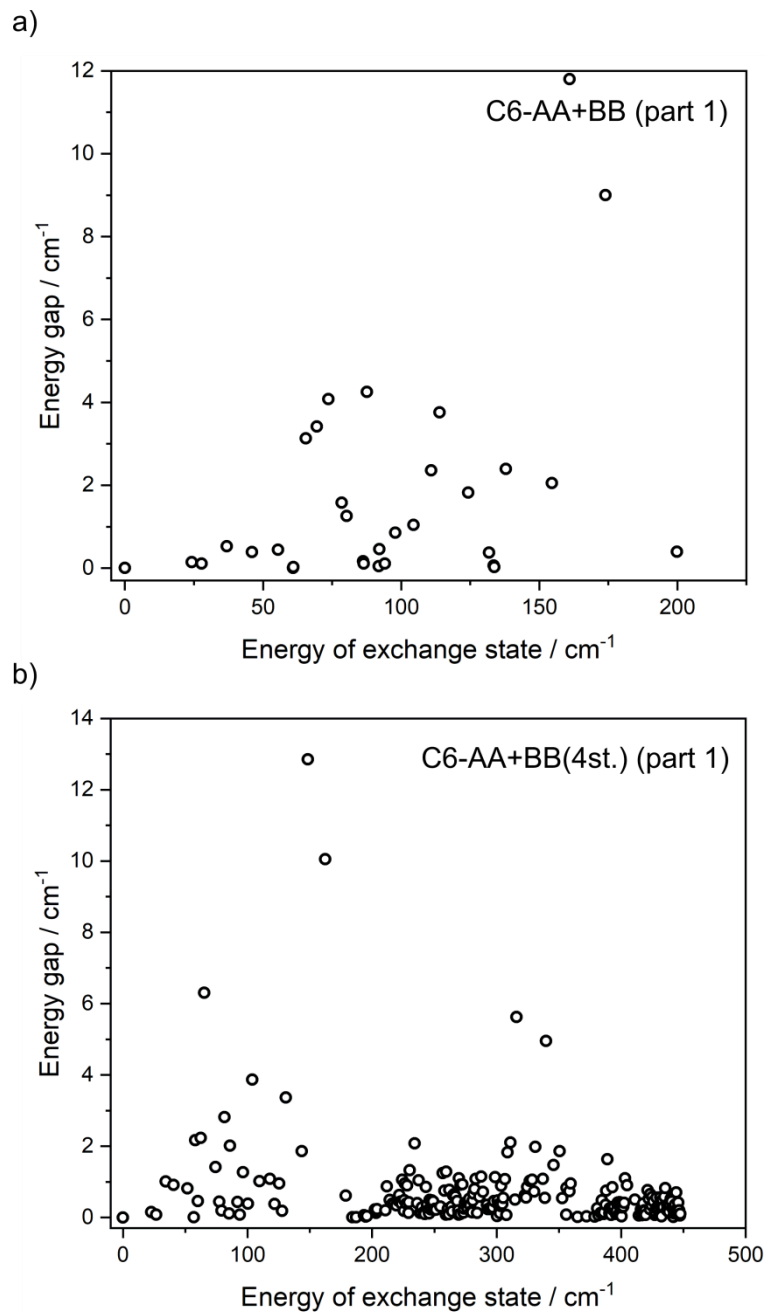

**Fig. S47** The dependence between the average energy of the pairs of exchange states (pseudo-doublets) and the related energy gaps determined for **2** using the *ab initio* calculations combined with the fitting of the exchange constant according to two selected magneto-structural models, named C6-AA+BB (part 1) (a) and C6-AA+BB(4st.) (part 1) (b) (these models produced the relatively good fits to the experimental data, see Fig. 7d). The models are visualized in Fig. 7 and Fig. S36 while the numerical data for the obtained exchange states are gathered in Table S22.

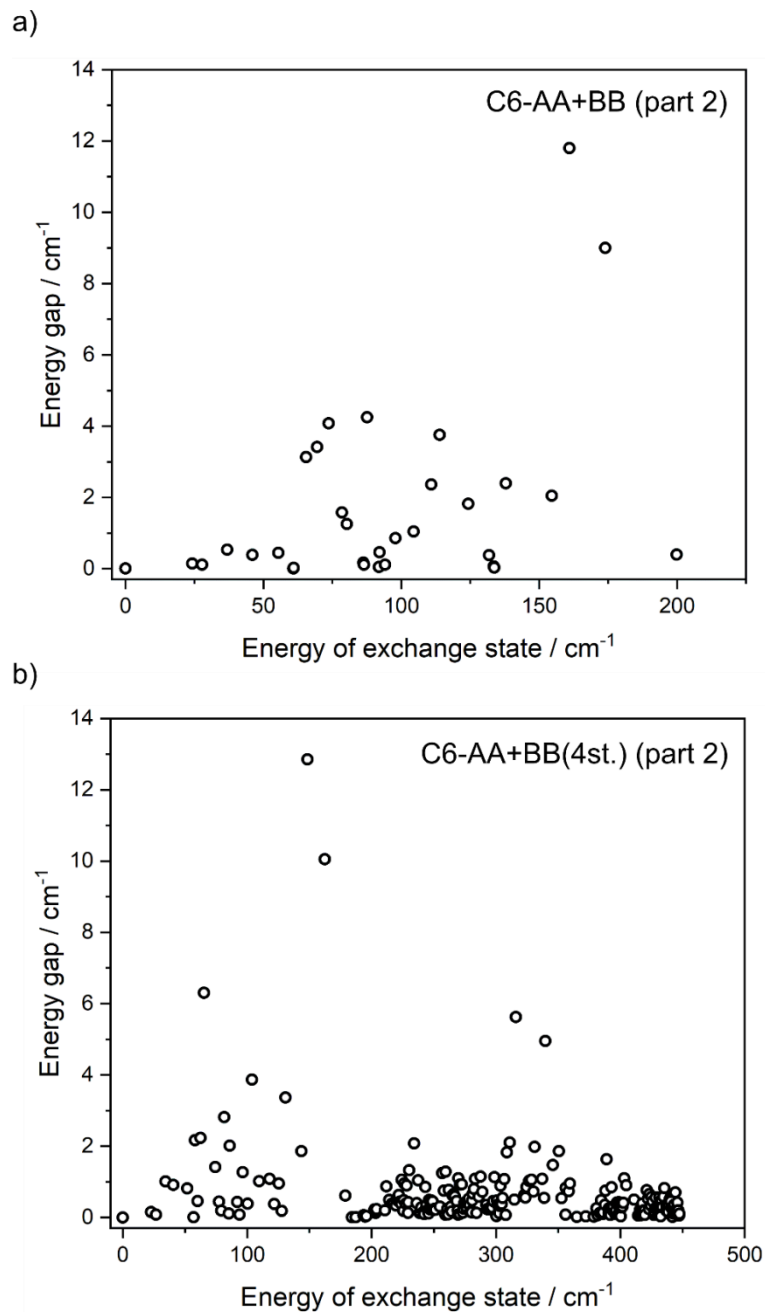

**Fig. S48** The dependence between the average energy of the pairs of exchange states (pseudo-doublets) and the related energy gaps determined for **2** using the *ab initio* calculations combined with the fitting of the exchange constant according to two selected magneto-structural models, named C6-AA+BB (part 2) (a) and C6-AA+BB(4st.) (part 2) (b) (these models produced the relatively good fits to the experimental data, see Fig. 7d). The models are visualized in Fig. 7 and Fig. S37 while the numerical data for the obtained exchange states are gathered in Table S24.

**Table S16** The selected parameters obtained from modelling the magnetic properties of **2** based on the results of the *ab initio* calculations combined with the fitting of the exchange coupling according to three magneto-structural models, named C6-ABBA, C6-ABBA(4st.), and C12-ABBA (Fig. S33 and Fig. S41). The presented results include the lists of 16 lowest lying exchange states (8 lowest lying pairs of exchange states, pseudo-doublets) and the respective energy gaps. The further, higher lying states are visualized in Fig. S41. The lowest lying pairs of states showing the relatively large energy gaps are emphasized by bold fonts. The labels (4st.) represent the extended calculations employing four higher energy states of each Co centre.

| No. of the pair of exchange states (pseudo-doublets) | Energy of a lower lying state / cm <sup>-1</sup> | Energy of a higher lying state / cm <sup>-1</sup> | Energy gap / cm <sup>-1</sup> |
|------------------------------------------------------|--------------------------------------------------|---------------------------------------------------|-------------------------------|
| model C6-ABBA (Fig. S33a and Fig. S41a)              |                                                  |                                                   |                               |
| 1                                                    | 0.0                                              | 0.010                                             | 0.010                         |
| 2                                                    | 22.976                                           | 24.037                                            | 1.061                         |
| 3                                                    | 26.821                                           | 28.002                                            | 1.181                         |
| 4                                                    | 29.805                                           | 30.274                                            | 0.469                         |
| 5                                                    | 36.719                                           | 36.920                                            | 0.201                         |
| 6                                                    | 38.542                                           | 38.923                                            | 0.381                         |
| 7                                                    | 46.512                                           | 46.898                                            | 0.386                         |
| <b>8</b>                                             | <b>50.061</b>                                    | <b>52.255</b>                                     | <b>2.194</b>                  |
| model C6-ABBA(4st.) (Fig. S33a and Fig. S41b)        |                                                  |                                                   |                               |
| 1                                                    | 0.0                                              | 0.008                                             | 0.008                         |
| 2                                                    | 20.590                                           | 21.416                                            | 0.826                         |
| 3                                                    | 25.293                                           | 26.587                                            | 1.294                         |
| 4                                                    | 28.761                                           | 29.113                                            | 0.352                         |
| 5                                                    | 34.381                                           | 34.818                                            | 0.437                         |
| 6                                                    | 36.866                                           | 37.510                                            | 0.644                         |
| 7                                                    | 42.293                                           | 43.317                                            | 1.024                         |
| <b>8</b>                                             | <b>45.989</b>                                    | <b>48.531</b>                                     | <b>2.542</b>                  |
| model C12-ABBA (Fig. S33b and Fig. S41c)             |                                                  |                                                   |                               |
| 1                                                    | 0.0                                              | 0.0                                               | 0.0                           |
| 2                                                    | 19.837                                           | 19.837                                            | 0.0                           |
| 3                                                    | 23.203                                           | 23.204                                            | 0.001                         |
| 4                                                    | 26.93                                            | 26.93                                             | 0.0                           |
| 5                                                    | 35.865                                           | 35.872                                            | 0.007                         |
| 6                                                    | 37.277                                           | 37.285                                            | 0.008                         |
| 7                                                    | 38.570                                           | 38.588                                            | 0.018                         |
| <b>8</b>                                             | <b>40.828</b>                                    | <b>40.848</b>                                     | <b>0.020</b>                  |



**Table S17** The selected parameters obtained from modelling the magnetic properties of **2** based on the results of the *ab initio* calculations combined with the fitting of the exchange coupling according to three magneto-structural models, named R6-ABBA, R6-ABBA(4st.), and R12-ABBA (Fig. S33 and Fig. S41). The presented results include the lists of 16 lowest lying exchange states (8 lowest lying pairs of exchange states, pseudo-doublets) and the respective energy gaps. The further, higher lying states are visualized in Fig. S41. The lowest lying pairs of states showing the relatively large energy gaps are emphasized by bold fonts. The labels (4st.) represent the extended calculations employing four higher energy states of each Co centre.

| No. of the pair of exchange states (pseudo-doublets) | Energy of a lower lying state / cm <sup>-1</sup> | Energy of a higher lying state / cm <sup>-1</sup> | Energy gap / cm <sup>-1</sup> |
|------------------------------------------------------|--------------------------------------------------|---------------------------------------------------|-------------------------------|
| model R6-ABBA (Fig. S33c and Fig. S41d)              |                                                  |                                                   |                               |
| 1                                                    | 0.0                                              | 0.016                                             | 0.016                         |
| 2                                                    | 10.943                                           | 10.996                                            | 0.053                         |
| 3                                                    | 18.630                                           | 18.746                                            | 0.116                         |
| 4                                                    | 25.036                                           | 25.787                                            | 0.751                         |
| 5                                                    | 27.666                                           | 27.749                                            | 0.083                         |
| 6                                                    | 31.014                                           | 31.718                                            | 0.704                         |
| <b>7</b>                                             | <b>36.695</b>                                    | <b>38.466</b>                                     | <b>1.771</b>                  |
| 8                                                    | 40.110                                           | 40.753                                            | 0.643                         |
| model R6-ABBA(4st.) (Fig. S33c and Fig. S41e)        |                                                  |                                                   |                               |
| 1                                                    | 0.0                                              | 0.016                                             | 0.016                         |
| 2                                                    | 11.835                                           | 11.886                                            | 0.051                         |
| 3                                                    | 19.422                                           | 19.539                                            | 0.117                         |
| 4                                                    | 24.009                                           | 25.054                                            | 1.045                         |
| 5                                                    | 27.740                                           | 27.916                                            | 0.176                         |
| 6                                                    | 30.299                                           | 31.964                                            | 1.665                         |
| <b>7</b>                                             | <b>34.492</b>                                    | <b>36.734</b>                                     | <b>2.242</b>                  |
| 8                                                    | 36.923                                           | 38.747                                            | 1.824                         |
| model R12-ABBA (Fig. S33d and Fig. S41f)             |                                                  |                                                   |                               |
| 1                                                    | 0.0                                              | 0.0                                               | 0.0                           |
| 2                                                    | 40.160                                           | 40.162                                            | 0.002                         |
| 3                                                    | 45.287                                           | 45.289                                            | 0.002                         |
| 4                                                    | 49.282                                           | 49.284                                            | 0.002                         |
| 5                                                    | 50.861                                           | 50.876                                            | 0.015                         |
| 6                                                    | 52.864                                           | 52.873                                            | 0.009                         |
| <b>7</b>                                             | <b>56.098</b>                                    | <b>56.149</b>                                     | <b>0.051</b>                  |
| 8                                                    | 57.677                                           | 57.699                                            | 0.022                         |

**Table S18** The selected parameters obtained from modelling the magnetic properties of **2** based on the results of the *ab initio* calculations combined with the fitting of the exchange coupling according to three magneto-structural models, named C6-ABAB, C6-ABAB(4st.), and C12-ABAB (Fig. S34 and Fig. S42). The presented results include the lists of 16 lowest lying exchange states (8 lowest lying pairs of exchange states, pseudo-doublets) and the respective energy gaps. The further, higher lying states are visualized in Fig. S42. The lowest lying pairs of states showing the relatively large energy gaps are emphasized by bold fonts. The labels (4st.) represent the extended calculations employing four higher energy states of each Co centre.

| No. of the pair of exchange states (pseudo-doublets) | Energy of a lower lying state / cm <sup>-1</sup> | Energy of a higher lying state / cm <sup>-1</sup> | Energy gap / cm <sup>-1</sup> |
|------------------------------------------------------|--------------------------------------------------|---------------------------------------------------|-------------------------------|
| model C6-ABAB (Fig. S34a and Fig. S42a)              |                                                  |                                                   |                               |
| 1                                                    | 0.0                                              | 0.012                                             | 0.012                         |
| 2                                                    | 21.620                                           | 22.853                                            | 1.233                         |
| 3                                                    | 24.563                                           | 25.762                                            | 1.199                         |
| 4                                                    | 27.176                                           | 27.612                                            | 0.436                         |
| 5                                                    | 37.313                                           | 37.669                                            | 0.356                         |
| 6                                                    | 39.749                                           | 40.107                                            | 0.358                         |
| 7                                                    | 45.313                                           | 45.609                                            | 0.296                         |
| <b>8</b>                                             | <b>46.494</b>                                    | <b>49.033</b>                                     | <b>2.539</b>                  |
| model C6-ABAB(4st.) (Fig. S34a and Fig. S42b)        |                                                  |                                                   |                               |
| 1                                                    | 0.0                                              | 0.009                                             | 0.009                         |
| 2                                                    | 19.290                                           | 20.274                                            | 0.984                         |
| 3                                                    | 23.020                                           | 24.270                                            | 1.250                         |
| 4                                                    | 25.857                                           | 26.198                                            | 0.341                         |
| 5                                                    | 34.269                                           | 35.176                                            | 0.907                         |
| 6                                                    | 37.814                                           | 38.276                                            | 0.462                         |
| 7                                                    | 41.012                                           | 42.305                                            | 1.293                         |
| <b>8</b>                                             | <b>42.538</b>                                    | <b>45.215</b>                                     | <b>2.677</b>                  |
| model C12-ABAB (Fig. S34b and Fig. S42c)             |                                                  |                                                   |                               |
| 1                                                    | 0.0                                              | 0.0                                               | 0.0                           |
| 2                                                    | 17.844                                           | 17.844                                            | 0.0                           |
| 3                                                    | 22.571                                           | 22.571                                            | 0.0                           |
| 4                                                    | 23.421                                           | 23.421                                            | 0.0                           |
| 5                                                    | 27.152                                           | 27.152                                            | 0.0                           |
| 6                                                    | 37.350                                           | 37.351                                            | 0.001                         |
| 7                                                    | 39.945                                           | 39.945                                            | 0.0                           |
| <b>8</b>                                             | <b>41.234</b>                                    | <b>41.236</b>                                     | <b>0.002</b>                  |

**Table S19** The selected parameters obtained from modelling the magnetic properties of **2** based on the results of the *ab initio* calculations combined with the fitting of the exchange coupling according to three magneto-structural models, named R6-ABAB, R6-ABAB(4st.), and R12-ABAB (Fig. S34 and Fig. S42). The presented results include the lists of 16 lowest lying exchange states (8 lowest lying pairs of exchange states, pseudo-doublets) and the respective energy gaps. The further, higher lying states are visualized in Fig. S42. The lowest lying pairs of states showing the relatively large energy gaps are emphasized by bold fonts. The labels (4st.) represent the extended calculations employing four higher energy states of each Co centre.

| No. of the pair of exchange states (pseudo-doublets) | Energy of a lower lying state / cm <sup>-1</sup> | Energy of a higher lying state / cm <sup>-1</sup> | Energy gap / cm <sup>-1</sup> |
|------------------------------------------------------|--------------------------------------------------|---------------------------------------------------|-------------------------------|
| model R6-ABAB (Fig. S34c and Fig. S42d)              |                                                  |                                                   |                               |
| 1                                                    | 0.0                                              | 0.0                                               | 0.0                           |
| 2                                                    | 23.285                                           | 23.379                                            | 0.094                         |
| 3                                                    | 25.201                                           | 25.351                                            | 0.150                         |
| <b>4</b>                                             | <b>30.488</b>                                    | <b>30.647</b>                                     | <b>0.159</b>                  |
| 5                                                    | 32.577                                           | 32.696                                            | 0.119                         |
| 6                                                    | 37.962                                           | 38.066                                            | 0.104                         |
| 7                                                    | 38.277                                           | 38.342                                            | 0.065                         |
| 8                                                    | 56.093                                           | 56.189                                            | 0.096                         |
| model R6-ABAB(4st.) (Fig. S34c and Fig. S42e)        |                                                  |                                                   |                               |
| 1                                                    | 0.0                                              | 0.0                                               | 0.0                           |
| 2                                                    | 22.181                                           | 22.273                                            | 0.092                         |
| 3                                                    | 23.844                                           | 23.974                                            | 0.130                         |
| 4                                                    | 30.200                                           | 30.386                                            | 0.186                         |
| 5                                                    | 32.056                                           | 32.210                                            | 0.154                         |
| <b>6</b>                                             | <b>36.253</b>                                    | <b>36.514</b>                                     | <b>0.261</b>                  |
| 7                                                    | 36.585                                           | 36.764                                            | 0.179                         |
| 8                                                    | 49.724                                           | 49.846                                            | 0.122                         |
| model R12-ABAB (Fig. S34d and Fig. S42f)             |                                                  |                                                   |                               |
| 1                                                    | 0.0                                              | 0.0                                               | 0.0                           |
| 2                                                    | 42.963                                           | 42.985                                            | 0.022                         |
| 3                                                    | 46.085                                           | 46.306                                            | 0.221                         |
| <b>4</b>                                             | <b>46.425</b>                                    | <b>46.602</b>                                     | <b>0.177</b>                  |
| 5                                                    | 49.510                                           | 49.541                                            | 0.031                         |
| 6                                                    | 52.108                                           | 52.109                                            | 0.001                         |
| 7                                                    | 54.481                                           | 54.483                                            | 0.002                         |
| 8                                                    | 55.111                                           | 55.116                                            | 0.005                         |

**Table S20** The selected parameters obtained from modelling the magnetic properties of **2** based on the results of the *ab initio* calculations combined with the fitting of the exchange coupling according to three magneto-structural models, named C6-AABB, C6-AABB(4st.), and C12-AABB (Fig. S35 and Fig. S43). The presented results include the lists of 16 lowest lying exchange states (8 lowest lying pairs of exchange states, pseudo-doublets) and the respective energy gaps. The further, higher lying states are visualized in Fig. S43. The lowest lying pairs of states showing the relatively large energy gaps are emphasized by bold fonts. The labels (4st.) represent the extended calculations employing four higher energy states of each Co centre.

| No. of the pair of exchange states (pseudo-doublets) | Energy of a lower lying state / cm <sup>-1</sup> | Energy of a higher lying state / cm <sup>-1</sup> | Energy gap / cm <sup>-1</sup> |
|------------------------------------------------------|--------------------------------------------------|---------------------------------------------------|-------------------------------|
| model C6-AABB (Fig. S35a and Fig. S43a)              |                                                  |                                                   |                               |
| 1                                                    | 0                                                | 0.003                                             | 0.003                         |
| 2                                                    | 27.778                                           | 28.031                                            | 0.253                         |
| 3                                                    | 30.335                                           | 30.522                                            | 0.187                         |
| <b>4</b>                                             | <b>47.023</b>                                    | <b>47.627</b>                                     | <b>0.604</b>                  |
| 5                                                    | 50.289                                           | 50.435                                            | 0.146                         |
| 6                                                    | 59.050                                           | 59.309                                            | 0.259                         |
| 7                                                    | 63.899                                           | 63.901                                            | 0.002                         |
| 8                                                    | 63.925                                           | 63.944                                            | 0.019                         |
| model C6-AABB(4st.) (Fig. S35a and Fig. S43b)        |                                                  |                                                   |                               |
| 1                                                    | 0.0                                              | 0.002                                             | 0.002                         |
| 2                                                    | 25.906                                           | 26.132                                            | 0.226                         |
| 3                                                    | 29.093                                           | 29.227                                            | 0.134                         |
| 4                                                    | 41.157                                           | 41.723                                            | 0.566                         |
| 5                                                    | 45.841                                           | 46.273                                            | 0.432                         |
| <b>6</b>                                             | <b>53.910</b>                                    | <b>55.218</b>                                     | <b>1.308</b>                  |
| 7                                                    | 59.488                                           | 59.536                                            | 0.048                         |
| 8                                                    | 59.880                                           | 61.756                                            | 1.876                         |
| model C12-AABB (Fig. S35b and Fig. S43c)             |                                                  |                                                   |                               |
| 1                                                    | 0.0                                              | 0.0                                               | 0.0                           |
| 2                                                    | 21.882                                           | 21.882                                            | 0.0                           |
| 3                                                    | 28.070                                           | 28.070                                            | 0.0                           |
| 4                                                    | 30.668                                           | 30.668                                            | 0.0                           |
| 5                                                    | 43.009                                           | 43.019                                            | 0.010                         |
| 6                                                    | 44.878                                           | 44.930                                            | 0.052                         |
| 7                                                    | 47.179                                           | 47.442                                            | 0.263                         |
| <b>8</b>                                             | <b>48.171</b>                                    | <b>48.510</b>                                     | <b>0.339</b>                  |

**Table S21** The selected parameters obtained from modelling the magnetic properties of **2** based on the results of the *ab initio* calculations combined with the fitting of the exchange coupling according to three magneto-structural models, named R6-AABB, R6-AABB(4st.), and R12-AABB (Fig. S35 and Fig. S43). The presented results include the lists of 16 lowest lying exchange states (8 lowest lying pairs of exchange states, pseudo-doublets) and the respective energy gaps. The further, higher lying states are visualized in Fig. S43. The lowest lying pairs of states showing the relatively large energy gaps are emphasized by bold fonts. The labels (4st.) represent the extended calculations employing four higher energy states of each Co centre.

| No. of the pair of exchange states (pseudo-doublets) | Energy of a lower lying state / cm <sup>-1</sup> | Energy of a higher lying state / cm <sup>-1</sup> | Energy gap / cm <sup>-1</sup> |
|------------------------------------------------------|--------------------------------------------------|---------------------------------------------------|-------------------------------|
| model R6-AABB (Fig. S35c and Fig. S43d)              |                                                  |                                                   |                               |
| 1                                                    | 0.0                                              | 0.005                                             | 0.005                         |
| 2                                                    | 22.654                                           | 22.747                                            | 0.093                         |
| <b>3</b>                                             | <b>27.637</b>                                    | <b>27.973</b>                                     | <b>0.336</b>                  |
| 4                                                    | 30.481                                           | 30.767                                            | 0.286                         |
| 5                                                    | 32.115                                           | 32.223                                            | 0.108                         |
| 6                                                    | 32.932                                           | 33.145                                            | 0.213                         |
| 7                                                    | 48.785                                           | 48.862                                            | 0.077                         |
| 8                                                    | 59.769                                           | 60.274                                            | 0.505                         |
| model R6-AABB(4st.) (Fig. S35c and Fig. S43e)        |                                                  |                                                   |                               |
| 1                                                    | 0.0                                              | 0.005                                             | 0.005                         |
| 2                                                    | 21.297                                           | 21.367                                            | 0.060                         |
| 3                                                    | 26.373                                           | 26.796                                            | 0.423                         |
| 4                                                    | 29.781                                           | 30.151                                            | 0.370                         |
| 5                                                    | 31.661                                           | 31.867                                            | 0.206                         |
| 6                                                    | 32.482                                           | 32.737                                            | 0.255                         |
| 7                                                    | 44.644                                           | 44.783                                            | 0.139                         |
| <b>8</b>                                             | <b>52.482</b>                                    | <b>53.671</b>                                     | <b>1.189</b>                  |
| model R12-AABB (Fig. S35d and Fig. S43f)             |                                                  |                                                   |                               |
| 1                                                    | 0.0                                              | 0.0                                               | 0.0                           |
| 2                                                    | 42.316                                           | 42.412                                            | 0.096                         |
| <b>3</b>                                             | <b>43.240</b>                                    | <b>43.382</b>                                     | <b>0.142</b>                  |
| 4                                                    | 46.430                                           | 46.480                                            | 0.050                         |
| 5                                                    | 47.958                                           | 47.964                                            | 0.006                         |
| 6                                                    | 52.171                                           | 52.181                                            | 0.010                         |
| 7                                                    | 53.334                                           | 53.337                                            | 0.003                         |

**Table S22** The selected parameters obtained from modelling the magnetic properties of **2** based on the results of the *ab initio* calculations combined with the fitting of the exchange coupling according to three magneto-structural models, named C6-AA+BB (part 1), C6-AA+BB(4st.) (part 1), and C12-AA+BB (part 1) (Fig. S36 and Fig. S44). The presented results include the lists of 16 lowest lying exchange states (8 lowest lying pairs of exchange states, pseudo-doublets) and the respective energy gaps. The further, higher lying states are visualized in Fig. S44. The lowest lying pairs of states showing the relatively large energy gaps are emphasized by bold fonts. The labels (4st.) represent the extended calculations employing four higher energy states of each Co centre.

| No. of the pair of exchange states (pseudo-doublets)    | Energy of a lower lying state / cm <sup>-1</sup> | Energy of a higher lying state / cm <sup>-1</sup> | Energy gap / cm <sup>-1</sup> |
|---------------------------------------------------------|--------------------------------------------------|---------------------------------------------------|-------------------------------|
| model C6-AA+BB (part 1) (Fig. S36a and Fig. S44a)       |                                                  |                                                   |                               |
| 1                                                       | 0.0                                              | 0.024                                             | 0.024                         |
| 2                                                       | 15.256                                           | 15.649                                            | 0.393                         |
| 3                                                       | 21.621                                           | 21.830                                            | 0.209                         |
| 4                                                       | 24.405                                           | 24.991                                            | 0.586                         |
| 5                                                       | 41.683                                           | 42.218                                            | 0.535                         |
| <b>6</b>                                                | <b>49.873</b>                                    | <b>50.642</b>                                     | <b>0.769</b>                  |
| 7                                                       | 55.357                                           | 55.362                                            | 0.005                         |
| 8                                                       | 55.472                                           | 55.514                                            | 0.042                         |
| model C6-AA+BB(4st.) (part 1) (Fig. S36a and Fig. S44b) |                                                  |                                                   |                               |
| 1                                                       | 0.0                                              | 0.022                                             | 0.022                         |
| 2                                                       | 14.136                                           | 14.592                                            | 0.456                         |
| 3                                                       | 20.723                                           | 20.908                                            | 0.185                         |
| <b>4</b>                                                | <b>22.821</b>                                    | <b>23.807</b>                                     | <b>0.986</b>                  |
| 5                                                       | 35.389                                           | 36.564                                            | 1.175                         |
| 6                                                       | 46.445                                           | 47.546                                            | 1.101                         |
| 7                                                       | 50.642                                           | 50.644                                            | 0.002                         |
| 8                                                       | 51.061                                           | 53.939                                            | 2.878                         |
| model C12-AA+BB (part 1) (Fig. S36b and Fig. S44c)      |                                                  |                                                   |                               |
| 1                                                       | 0.0                                              | 0.0                                               | 0.0                           |
| 2                                                       | 16.162                                           | 16.163                                            | 0.001                         |
| 3                                                       | 22.169                                           | 22.169                                            | 0.0                           |
| 4                                                       | 22.532                                           | 22.533                                            | 0.001                         |
| 5                                                       | 25.397                                           | 25.399                                            | 0.002                         |
| <b>6</b>                                                | <b>35.516</b>                                    | <b>35.760</b>                                     | <b>0.244</b>                  |
| 7                                                       | 35.851                                           | 36.123                                            | 0.272                         |
| 8                                                       | 38.397                                           | 38.436                                            | 0.039                         |

**Table S23** The selected parameters obtained from modelling the magnetic properties of **2** based on the results of the *ab initio* calculations combined with the fitting of the exchange coupling according to three magneto-structural models, named R6-AA+BB (part 1), R6-AA+BB(4st.) (part 1), and R12-AA+BB (part 1) (Fig. S36 and Fig. S44). The presented results include the lists of 16 lowest lying exchange states (8 lowest lying pairs of exchange states, pseudo-doublets) and the respective energy gaps. The further, higher lying states are visualized in Fig. S44. The lowest lying pairs of states showing the relatively large energy gaps are emphasized by bold fonts. The labels (4st.) represent the extended calculations employing four higher energy states of each Co centre.

| No. of the pair of exchange states (pseudo-doublets)    | Energy of a lower lying state / cm <sup>-1</sup> | Energy of a higher lying state / cm <sup>-1</sup> | Energy gap / cm <sup>-1</sup> |
|---------------------------------------------------------|--------------------------------------------------|---------------------------------------------------|-------------------------------|
| model R6-AA+BB (part 1) (Fig. S36c and Fig. S44d)       |                                                  |                                                   |                               |
| 1                                                       | 0.0                                              | 0.010                                             | 0.010                         |
| 2                                                       | 14.700                                           | 14.818                                            | 0.118                         |
| 3                                                       | 20.515                                           | 20.656                                            | 0.141                         |
| 4                                                       | 30.635                                           | 31.762                                            | 1.127                         |
| 5                                                       | 35.124                                           | 35.492                                            | 0.368                         |
| 6                                                       | 36.228                                           | 37.089                                            | 0.861                         |
| <b>7</b>                                                | <b>41.635</b>                                    | <b>46.298</b>                                     | <b>4.663</b>                  |
| 8                                                       | 46.394                                           | 48.446                                            | 2.052                         |
| model R6-AA+BB(4st.) (part 1) (Fig. S36c and Fig. S44e) |                                                  |                                                   |                               |
| 1                                                       | 0.0                                              | 0.006                                             | 0.006                         |
| 2                                                       | 14.952                                           | 15.011                                            | 0.059                         |
| 3                                                       | 21.650                                           | 21.735                                            | 0.085                         |
| <b>4</b>                                                | <b>29.340</b>                                    | <b>31.429</b>                                     | <b>2.089</b>                  |
| 5                                                       | 32.583                                           | 34.821                                            | 2.238                         |
| 6                                                       | 36.191                                           | 37.276                                            | 1.085                         |
| 7                                                       | 38.658                                           | 42.626                                            | 3.968                         |
| 8                                                       | 43.113                                           | 45.705                                            | 2.592                         |
| model R12-AA+BB (part 1) (Fig. S36d and Fig. S44f)      |                                                  |                                                   |                               |
| 1                                                       | 0.0                                              | 0.0                                               | 0.0                           |
| 2                                                       | 37.008                                           | 37.097                                            | 0.089                         |
| 3                                                       | 39.792                                           | 39.793                                            | 0.001                         |
| <b>4</b>                                                | <b>42.161</b>                                    | <b>42.804</b>                                     | <b>0.643</b>                  |
| 5                                                       | 44.190                                           | 44.505                                            | 0.315                         |
| 6                                                       | 44.511                                           | 44.674                                            | 0.163                         |
| 7                                                       | 48.431                                           | 49.239                                            | 0.808                         |
| 8                                                       | 51.143                                           | 52.164                                            | 1.021                         |

**Table S24** The selected parameters obtained from modelling the magnetic properties of **2** based on the results of the *ab initio* calculations combined with the fitting of the exchange coupling according to three magneto-structural models, named C6-AA+BB (part 2), C6-AA+BB(4st.) (part 2), and C12-AA+BB (part 2) (Fig. S37 and Fig. S45). The presented results include the lists of 16 lowest lying exchange states (8 lowest lying pairs of exchange states, pseudo-doublets) and the respective energy gaps. The further, higher lying states are visualized in Fig. S45. The lowest lying pairs of states showing the relatively large energy gaps are emphasized by bold fonts. The labels (4st.) represent the extended calculations employing four higher energy states of each Co centre.

| No. of the pair of exchange states (pseudo-doublets)    | Energy of a lower lying state / cm <sup>-1</sup> | Energy of a higher lying state / cm <sup>-1</sup> | Energy gap / cm <sup>-1</sup> |
|---------------------------------------------------------|--------------------------------------------------|---------------------------------------------------|-------------------------------|
| model C6-AA+BB (part 2) (Fig. S37a and Fig. S45a)       |                                                  |                                                   |                               |
| 1                                                       | 0.0                                              | 0.002                                             | 0.002                         |
| 2                                                       | 24.264                                           | 24.409                                            | 0.145                         |
| 3                                                       | 27.787                                           | 27.897                                            | 0.110                         |
| <b>4</b>                                                | <b>36.851</b>                                    | <b>37.381</b>                                     | <b>0.530</b>                  |
| 5                                                       | 46.044                                           | 46.434                                            | 0.390                         |
| 6                                                       | 55.449                                           | 55.892                                            | 0.443                         |
| 7                                                       | 60.898                                           | 60.901                                            | 0.003                         |
| 8                                                       | 61.040                                           | 61.065                                            | 0.025                         |
| model C6-AA+BB(4st.) (part 2) (Fig. S37a and Fig. S45b) |                                                  |                                                   |                               |
| 1                                                       | 0.0                                              | 0.001                                             | 0.001                         |
| 2                                                       | 22.650                                           | 22.800                                            | 0.150                         |
| 3                                                       | 26.683                                           | 26.760                                            | 0.077                         |
| <b>4</b>                                                | <b>34.374</b>                                    | <b>35.387</b>                                     | <b>1.013</b>                  |
| 5                                                       | 40.616                                           | 41.525                                            | 0.909                         |
| 6                                                       | 51.663                                           | 52.477                                            | 0.814                         |
| 7                                                       | 56.981                                           | 56.988                                            | 0.007                         |
| 8                                                       | 57.928                                           | 60.095                                            | 2.167                         |
| model C12-AA+BB (part 2) (Fig. S37b and Fig. S45c)      |                                                  |                                                   |                               |
| 1                                                       | 0.0                                              | 0.0                                               | 0.0                           |
| 2                                                       | 24.529                                           | 24.529                                            | 0.0                           |
| 3                                                       | 28.009                                           | 28.009                                            | 0.0                           |
| 4                                                       | 37.964                                           | 37.964                                            | 0.0                           |
| 5                                                       | 40.864                                           | 40.865                                            | 0.001                         |
| <b>6</b>                                                | <b>44.925</b>                                    | <b>44.934</b>                                     | <b>0.009</b>                  |
| 7                                                       | 46.264                                           | 46.278                                            | 0.014                         |
| 8                                                       | 49.222                                           | 49.233                                            | 0.011                         |



**Table S25** The selected parameters obtained from modelling the magnetic properties of **2** based on the results of the *ab initio* calculations combined with the fitting of the exchange coupling according to three magneto-structural models, named R6-AA+BB (part 2), R6-AA+BB(4st.) (part 2), and R12-AA+BB (part 2) (Fig. S37 and Fig. S45). The presented results include the lists of 16 lowest lying exchange states (8 lowest lying pairs of exchange states, pseudo-doublets) and the respective energy gaps. The further, higher lying states are visualized in Fig. S45. The lowest lying pairs of states showing the relatively large energy gaps are emphasized by bold fonts. The labels (4st.) represent the extended calculations employing four higher energy states of each Co centre.

| No. of the pair of exchange states (pseudo-doublets)    | Energy of a lower lying state / cm <sup>-1</sup> | Energy of a higher lying state / cm <sup>-1</sup> | Energy gap / cm <sup>-1</sup> |
|---------------------------------------------------------|--------------------------------------------------|---------------------------------------------------|-------------------------------|
| model R6-AA+BB (part 2) (Fig. S37c and Fig. S45d)       |                                                  |                                                   |                               |
| 1                                                       | 0.0                                              | 0.033                                             | 0.033                         |
| 2                                                       | 5.572                                            | 5.686                                             | 0.114                         |
| 3                                                       | 12.620                                           | 12.762                                            | 0.142                         |
| 4                                                       | 15.558                                           | 15.729                                            | 0.171                         |
| 5                                                       | 20.091                                           | 20.211                                            | 0.120                         |
| 6                                                       | 20.618                                           | 20.859                                            | 0.241                         |
| <b>7</b>                                                | <b>27.064</b>                                    | <b>27.498</b>                                     | <b>0.434</b>                  |
| 8                                                       | 28.537                                           | 28.668                                            | 0.131                         |
| model R6-AA+BB(4st.) (part 2) (Fig. S37c and Fig. S45e) |                                                  |                                                   |                               |
| 1                                                       | 0.0                                              | 0.023                                             | 0.023                         |
| 2                                                       | 6.307                                            | 6.373                                             | 0.066                         |
| 3                                                       | 14.174                                           | 14.255                                            | 0.081                         |
| 4                                                       | 16.230                                           | 16.502                                            | 0.272                         |
| 5                                                       | 20.695                                           | 20.792                                            | 0.097                         |
| 6                                                       | 21.829                                           | 22.068                                            | 0.239                         |
| <b>7</b>                                                | <b>25.093</b>                                    | <b>25.990</b>                                     | <b>0.897</b>                  |
| 8                                                       | 27.452                                           | 27.577                                            | 0.125                         |
| model R12-AA+BB (part 2) (Fig. S37d and Fig. S45f)      |                                                  |                                                   |                               |
| 1                                                       | 0.0                                              | 0.0                                               | 0.0                           |
| 2                                                       | 46.181                                           | 46.181                                            | 0.0                           |
| 3                                                       | 50.441                                           | 50.441                                            | 0.0                           |
| <b>4</b>                                                | <b>53.124</b>                                    | <b>53.125</b>                                     | <b>0.001</b>                  |
| 5                                                       | 56.000                                           | 56.000                                            | 0.0                           |
| 6                                                       | 56.025                                           | 56.025                                            | 0.0                           |
| 7                                                       | 58.200                                           | 58.200                                            | 0.0                           |
| 8                                                       | 59.815                                           | 59.815                                            | 0.0                           |

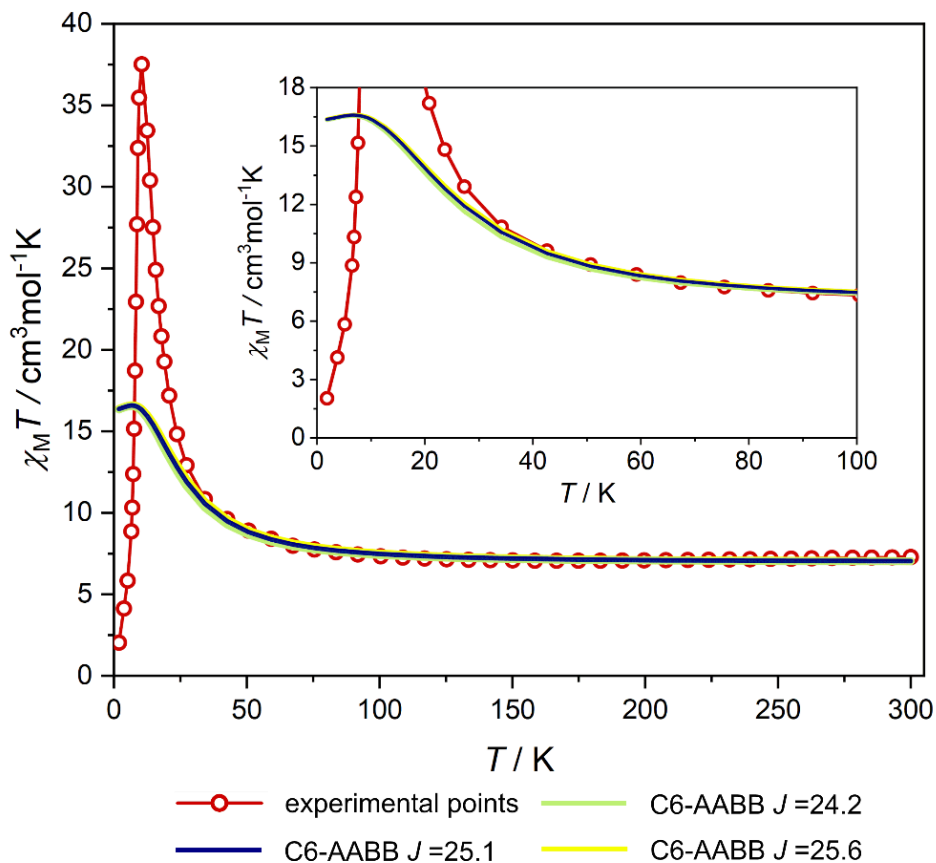

**Fig. S49** Experimental temperature dependence of the  $\chi_M T$  product under  $H_{dc} = 1000$  Oe for **2** compared with the  $\chi_M T(T)$  plots simulated using the results of the *ab initio* calculations combined with the fitting of the exchange coupling employing the magneto-structural model of C6-AABB with three different indicated coupling constants,  $J$  of 24.2, 25.1, and 25.6  $\text{cm}^{-1}$  ( $J'$  was fixed to be  $-0.6 \text{ cm}^{-1}$  following the analysis of the magnetic data for compound 1).

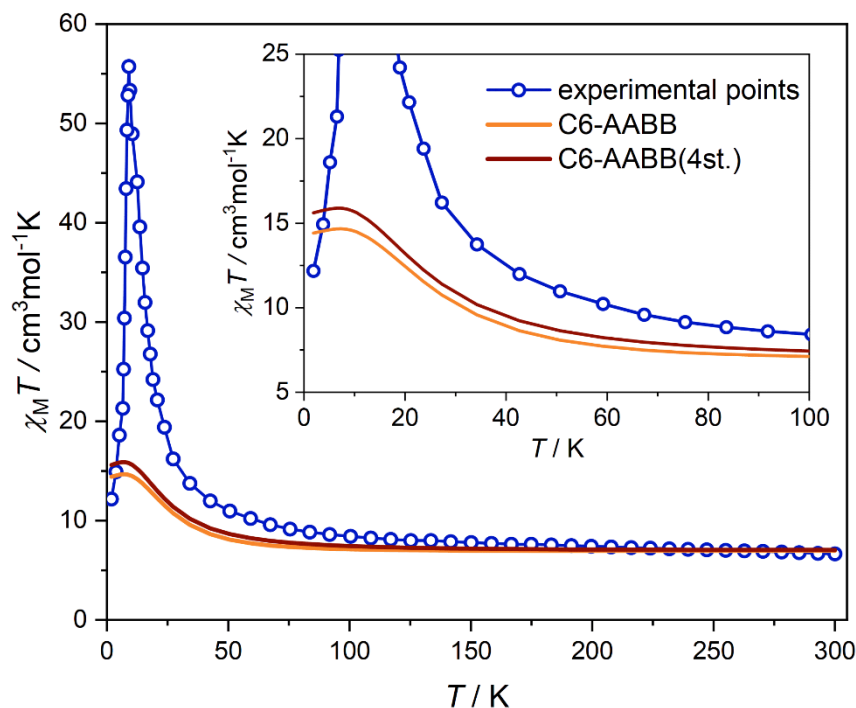

**Fig. S50** Experimental temperature dependence of the  $\chi_M T$  product under  $H_{dc} = 1000$  Oe for **3** compared with the  $\chi_M T(T)$  curves calculated using the results of the *ab initio* calculations combined with the simulations of magnetic exchange employing C6-AABB and C6-AABB(4st.) models. All simulations are shown for the best-fit using the  $J$  value of  $25.1 \text{ cm}^{-1}$  and the  $J'$  of  $-0.6 \text{ cm}^{-1}$  taken from the modelling of the magnetic properties of **1** (Fig. 6). The extension (4st.) used for the part of the presented models represent the extended calculations employing four higher lying energy states of each Co centre while only the lowest ones are used for other calculations.

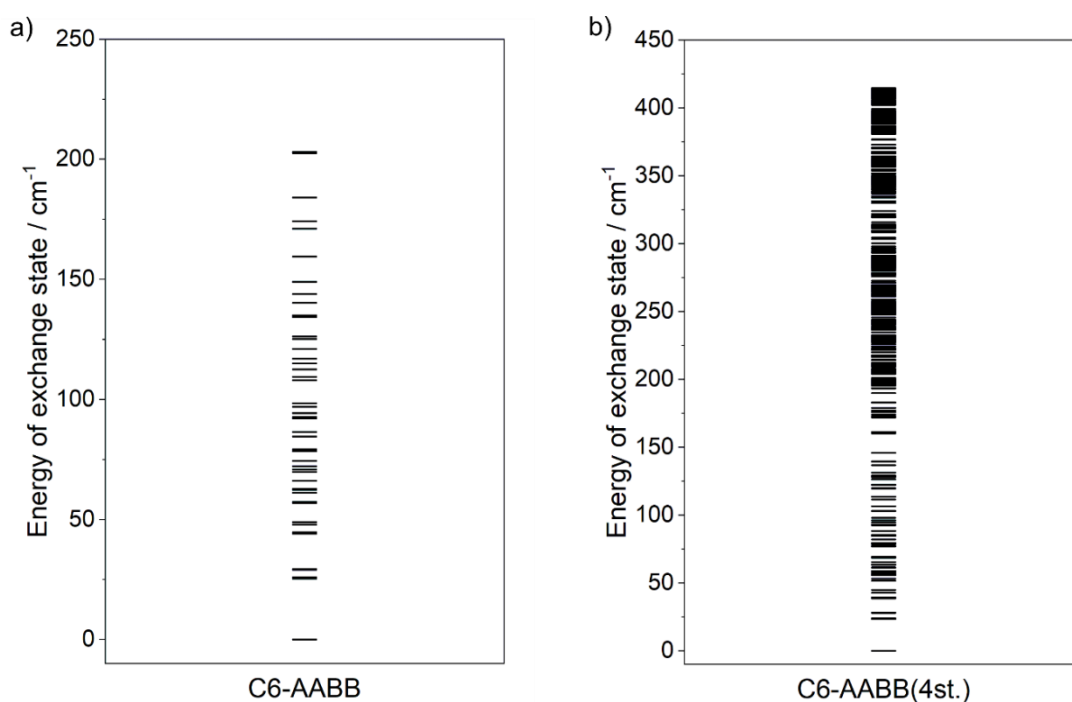

**Fig. S51** The scheme of exchange states for **3** calculated using the results of the *ab initio* calculations (Tables S9–S10, Fig. 5, and Fig. 7) combined with the fitting of the exchange coupling pathways according to two selected magneto-structural models of C6-AABB and C6-AABB(4st.). The extension (4st.) used for the part of the presented models represent the extended calculations employing four higher lying energy states of each Co centre while only the lowest ones are used for other calculations. For the visualization of the indicated models see Fig. S35. The results are for the optimized set of exchange coupling constants of  $J = 25.1 \text{ cm}^{-1}$ ,  $J' = -0.6 \text{ cm}^{-1}$ .

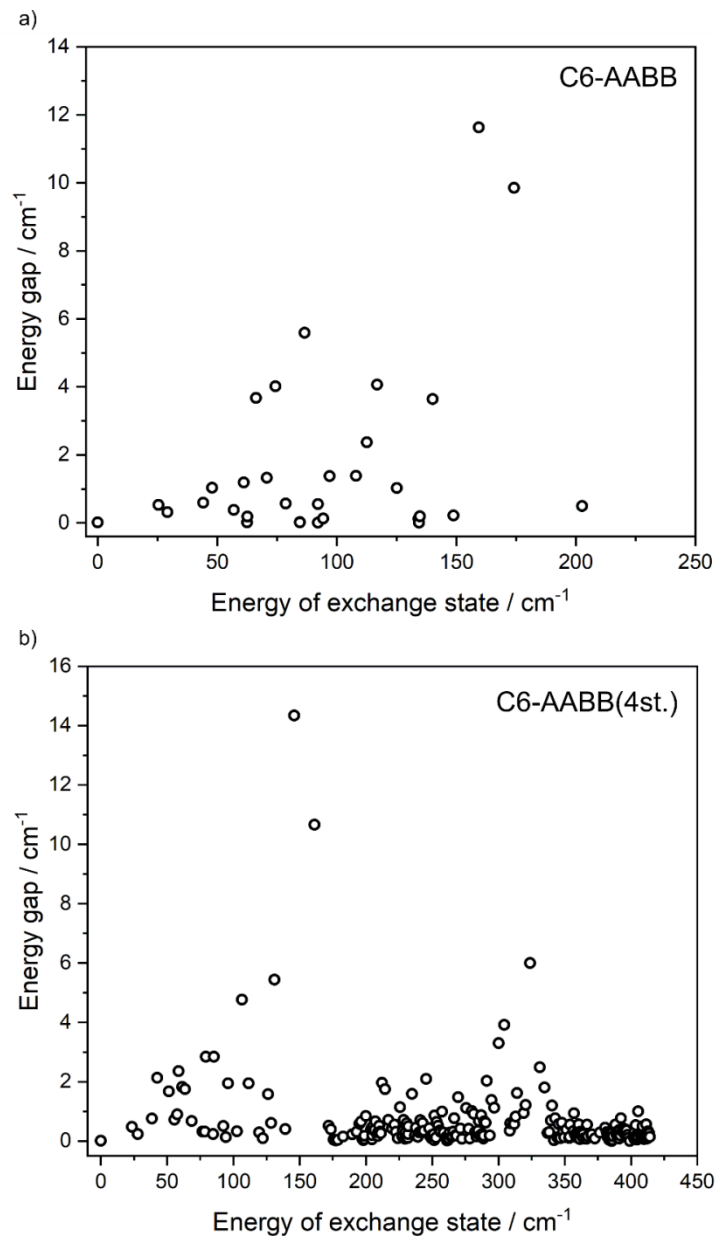

**Fig. S52** The dependence between the average energy of the pairs of exchange states (pseudo-doublets) and the related energy gaps determined for **3** using the *ab initio* calculations combined with the fitting of the exchange constant according to two selected magneto-structural models, named C6-AABB (a) and C6-AABB(4st.) (b) (these models produced the best-fit to the experimental data). The models are visualized in Fig. 7 and Fig. S35 while the numerical data for the obtained exchange states are gathered in Table 3 and Table S26.

**Table S26** The selected parameters obtained from modelling the magnetic properties of **3** based on the results of the *ab initio* calculations combined with the fitting of the exchange coupling according to two magneto-structural models, named C6-AABB and C6-AABB(4st.), and R12-AABB (Fig. S35 and Fig. S51). The presented results include the lists of 16 lowest lying exchange states (8 lowest lying pairs of exchange states, pseudo-doublets) and the respective energy gaps. The further, higher lying states are visualized in Fig. S51. The lowest lying pairs of states showing the relatively large energy gaps are emphasized by bold fonts. The labels (4st.) represent the extended calculations employing four higher energy states of each Co centres.

| No. of the pair of exchange states (pseudo-doublets) | Energy of a lower lying state / cm <sup>-1</sup> | Energy of a higher lying state / cm <sup>-1</sup> | Energy gap / cm <sup>-1</sup> |
|------------------------------------------------------|--------------------------------------------------|---------------------------------------------------|-------------------------------|
| model C6-AABB (Fig. S35a and Fig. S51a)              |                                                  |                                                   |                               |
| 1                                                    | 0.0                                              | 0.01                                              | 0.010                         |
| 2                                                    | 25.403                                           | 25.931                                            | 0.528                         |
| 3                                                    | 29.076                                           | 29.392                                            | 0.316                         |
| 4                                                    | 44.076                                           | 44.665                                            | 0.589                         |
| <b>5</b>                                             | <b>47.867</b>                                    | <b>48.904</b>                                     | <b>1.037</b>                  |
| 6                                                    | 56.869                                           | 57.246                                            | 0.377                         |
| 7                                                    | 61.135                                           | 62.320                                            | 1.185                         |
| 8                                                    | 62.502                                           | 62.515                                            | 0.013                         |
| model C6-AABB(4st.) (Fig. S35a and Fig. S51b)        |                                                  |                                                   |                               |
| 1                                                    | 0.0                                              | 0.008                                             | 0.008                         |
| 2                                                    | 23.392                                           | 23.874                                            | 0.482                         |
| 3                                                    | 27.929                                           | 28.161                                            | 0.232                         |
| 4                                                    | 38.602                                           | 39.361                                            | 0.759                         |
| <b>5</b>                                             | <b>42.600</b>                                    | <b>44.732</b>                                     | <b>2.132</b>                  |
| 6                                                    | 51.396                                           | 53.066                                            | 1.670                         |
| 7                                                    | 55.624                                           | 56.347                                            | 0.723                         |
| 8                                                    | 57.604                                           | 58.505                                            | 0.901                         |

(a) chains with Co/W = 1/1

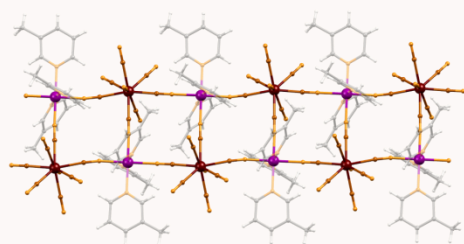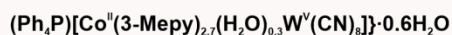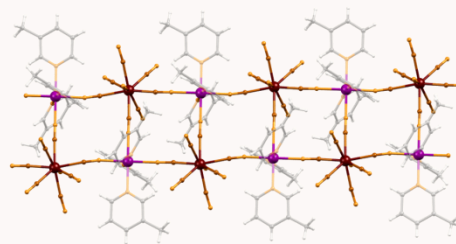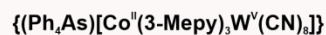

(b) chains with Co/W = 3/2

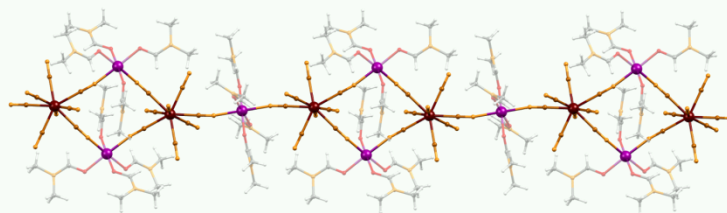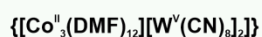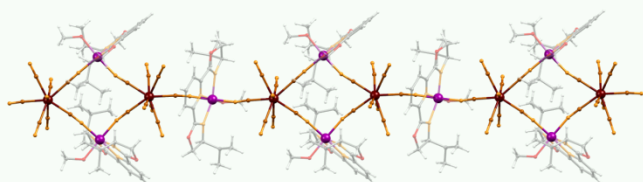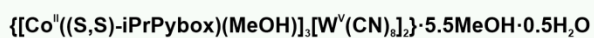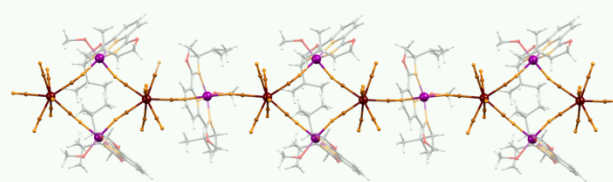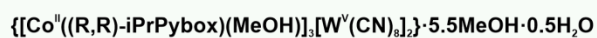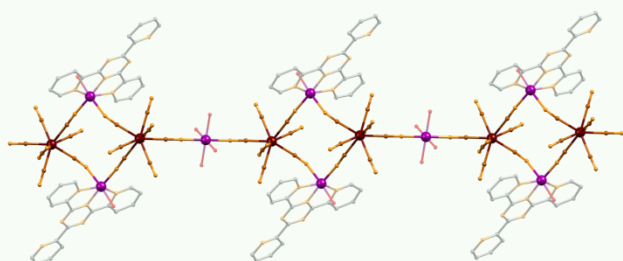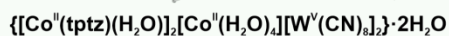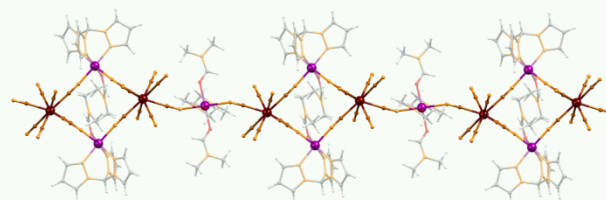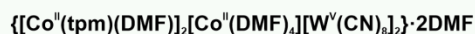

(c) chains with Co/W = 2/1

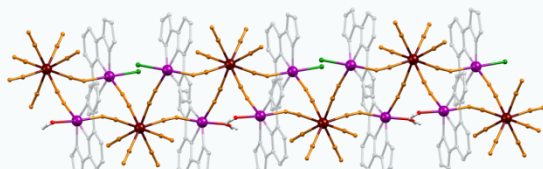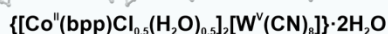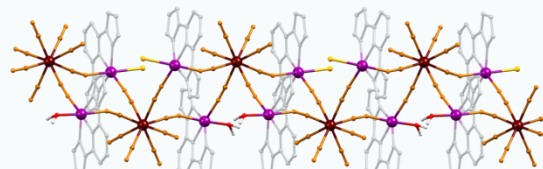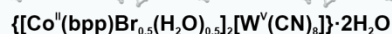

**Fig. S53** Comparison of the representative structural fragments of **2** and **3** with other reported cyanido-bridged  $\text{Co}^{\text{II}}\text{--}[\text{W}^{\text{V}}(\text{CN})_8]^{3-}$  chains, including the chains with Co/W ratio of 1/1 (a, reference S3), Co/W ratio of 3/2 (b, references S4–S7), and Co/W ratio of 2/1 (c, compounds **2** and **3**, this work). The formula of the respective compound is shown below each structural fragment. A more detailed comparison of structural features and magnetic properties of **2** and **3** with other reported Co–W chains is provided in Table S26. The abbreviations for ligands are gathered in Table S27.

**Table S27** Comparison of structural features and magnetic properties of **2** and **3** with other reported  $\text{Co}^{\text{II}}\text{-}[\text{W}^{\text{V}}(\text{CN})_8]^{3-}$  chains.

I [S8]

| <b>(Ph<sub>4</sub>P)[Co<sup>II</sup>(3-Mepy)<sub>2.7</sub>(H<sub>2</sub>O)<sub>0.3</sub>W<sup>V</sup>(CN)<sub>8</sub>]·0.6H<sub>2</sub>O / 3-Mepy = 3-methylpyridine</b> |            |                                                                                                                                      |                                                                                                                                                                                                                                                                                                                                                                                                                                                                                                     |
|--------------------------------------------------------------------------------------------------------------------------------------------------------------------------|------------|--------------------------------------------------------------------------------------------------------------------------------------|-----------------------------------------------------------------------------------------------------------------------------------------------------------------------------------------------------------------------------------------------------------------------------------------------------------------------------------------------------------------------------------------------------------------------------------------------------------------------------------------------------|
| Co/W ratio                                                                                                                                                               | Topology   | Co <sup>II</sup> complex                                                                                                             | Magnetic properties                                                                                                                                                                                                                                                                                                                                                                                                                                                                                 |
| 1:1                                                                                                                                                                      | 3,3-ladder | <b>O<sub>h</sub></b><br>[Co <sup>II</sup> (3-Mepy) <sub>2.7</sub> (H <sub>2</sub> O) <sub>0.3</sub> (NC) <sub>3</sub> ] <sup>-</sup> | <b>Ferromagnetic intrachain coupling</b><br><b>Single-Chain Magnet (SCM)</b><br>$\Delta_{\tau}$ (infinite-size chain) = 252(9) K (176(6) cm <sup>-1</sup> )<br>$\Delta_{\tau}$ (finite-size chain) = 169(2) K (118(1) cm <sup>-1</sup> )<br>$\tau_0$ values between 10 <sup>-10</sup> and 10 <sup>-13</sup> s<br><b>Magnetic hysteresis loop at T = 1.8 K</b><br>$H_c = 26.2$ kOe, $M_r = 1.28 \mu_B$<br>(along chain axis)<br>$H_c = 12.5$ kOe, $M_r = 3.1 \mu_B$<br>(perpendicular to chain axis) |

II [S8]

| <b>(Ph<sub>4</sub>As)[Co<sup>II</sup>(3Mepy)<sub>3</sub>W<sup>V</sup>(CN)<sub>8</sub>] / 3-Mepy = 3-methylpyridine</b> |            |                                                                                                  |                                                                                                                                                                                                                                                                                                                                                                                                                                                                                                    |
|------------------------------------------------------------------------------------------------------------------------|------------|--------------------------------------------------------------------------------------------------|----------------------------------------------------------------------------------------------------------------------------------------------------------------------------------------------------------------------------------------------------------------------------------------------------------------------------------------------------------------------------------------------------------------------------------------------------------------------------------------------------|
| Co/W ratio                                                                                                             | Topology   | Co <sup>II</sup> complex                                                                         | Magnetic properties                                                                                                                                                                                                                                                                                                                                                                                                                                                                                |
| 1:1                                                                                                                    | 3,3-ladder | <b>O<sub>h</sub></b><br>[Co <sup>II</sup> (3-Mepy) <sub>3</sub> (NC) <sub>3</sub> ] <sup>-</sup> | <b>Ferromagnetic intrachain coupling</b><br><b>Single-Chain Magnet (SCM)</b><br>$\Delta_{\tau}$ (infinite-size chain) = 224(7) K (156(5) cm <sup>-1</sup> )<br>$\Delta_{\tau}$ (finite-size chain) = 154(1) K (107(1) cm <sup>-1</sup> )<br>$\tau_0$ values between 10 <sup>-10</sup> and 10 <sup>-13</sup> s<br><b>Magnetic hysteresis loop at T = 1.8 K</b><br>$H_c = 22.6$ kOe, $M_r = 1.27 \mu_B$<br>(along chain axis)<br>$H_c = 7.9$ kOe, $M_r = 3.6 \mu_B$<br>(perpendicular to chain axis) |

III [S9]

| <b>{[Co<sup>II</sup><sub>3</sub>(DMF)<sub>12</sub>][W<sup>V</sup>(CN)<sub>8</sub>]<sub>2</sub>} / DMF = N,N-Dimethylformamide</b> |           |                                                                                  |                                                                                                                                                                                                                                                                                                        |
|-----------------------------------------------------------------------------------------------------------------------------------|-----------|----------------------------------------------------------------------------------|--------------------------------------------------------------------------------------------------------------------------------------------------------------------------------------------------------------------------------------------------------------------------------------------------------|
| Co/W ratio                                                                                                                        | Topology  | Co <sup>II</sup> complex                                                         | Magnetic properties                                                                                                                                                                                                                                                                                    |
| 3:2                                                                                                                               | 3,2-chain | <b>O<sub>h</sub></b><br>[Co <sup>II</sup> (DMF) <sub>4</sub> (NC) <sub>2</sub> ] | <b>Ferromagnetic intrachain coupling</b><br><b>Ferromagnetic long-range ordering</b><br>below $T_c = 7.3$ K<br><b>Magnetic hysteresis loop at T = 1.8 K</b><br>$H_c = 907$ Oe, $M_r = 3.39 \mu_B$<br><b>Spin glass behaviour</b><br>with $\Delta E/k_B = 170(3)$ K and $\tau_0 = 2.3 \cdot 10^{-15}$ s |

IV [S10]

| <b>{[Co<sup>II</sup>((S,S)-iPrPybox)(MeOH)]<sub>3</sub>[W<sup>V</sup>(CN)<sub>8</sub>]<sub>2</sub>}·5.5MeOH·0.5H<sub>2</sub>O</b><br><i>iPrPybox</i> = 2,2'-(2,6-pyridinediyl)bis(4-isopropyl-2-oxazoline) |           |                                                                                     |                                                                                                                                                                                                                                                                |
|------------------------------------------------------------------------------------------------------------------------------------------------------------------------------------------------------------|-----------|-------------------------------------------------------------------------------------|----------------------------------------------------------------------------------------------------------------------------------------------------------------------------------------------------------------------------------------------------------------|
| Co/W ratio                                                                                                                                                                                                 | Topology  | Co <sup>II</sup> complex                                                            | Magnetic properties                                                                                                                                                                                                                                            |
| 3:2                                                                                                                                                                                                        | 3,2-chain | <b>O<sub>h</sub></b><br>[Co <sup>II</sup> ((S,S)-iPrPybox)(MeOH)(NC) <sub>2</sub> ] | <b>Mixed scheme of ferromagnetic and antiferromagnetic intrachain coupling</b><br><b>Onset of SCM behaviour</b><br>with $\Delta E/k_B = 6$ K (4.2 cm <sup>-1</sup> ) and $\tau_0 = 5 \cdot 10^{-7}$ s<br><b>Lack of magnetic hysteresis loop down to 1.8 K</b> |

V [S10]

| <b>{[Co<sup>II</sup>((R,R)-iPrPybox)(MeOH)]<sub>3</sub>[W<sup>V</sup>(CN)<sub>8</sub>]<sub>2</sub>}·5.5MeOH·0.5H<sub>2</sub>O</b><br><i>iPrPybox</i> = 2,2'-(2,6-pyridinediyl)bis(4-isopropyl-2-oxazoline) |           |                                                                                     |                                                                                                                                                                 |
|------------------------------------------------------------------------------------------------------------------------------------------------------------------------------------------------------------|-----------|-------------------------------------------------------------------------------------|-----------------------------------------------------------------------------------------------------------------------------------------------------------------|
| Co/W ratio                                                                                                                                                                                                 | Topology  | Co <sup>II</sup> complex                                                            | Magnetic properties                                                                                                                                             |
| 3:2                                                                                                                                                                                                        | 3,2-chain | <b>O<sub>h</sub></b><br>[Co <sup>II</sup> ((R,R)-iPrPybox)(MeOH)(NC) <sub>2</sub> ] | <b>Mixed scheme of ferromagnetic and antiferromagnetic intrachain coupling</b><br><b>Onset of SCM behaviour, Lack of magnetic hysteresis loop down to 1.8 K</b> |

VI [S11]

| <b>{[Co<sup>II</sup>(tptz)(H<sub>2</sub>O)]<sub>2</sub>[Co<sup>II</sup>(H<sub>2</sub>O)<sub>4</sub>][W<sup>V</sup>(CN)<sub>8</sub>]<sub>2</sub>}·2H<sub>2</sub>O / tptz = 2,4,6-tris(2-pyridyl)-1,3,5-triazine</b> |           |                                                                                                                                                                    |                                                                                                                           |
|--------------------------------------------------------------------------------------------------------------------------------------------------------------------------------------------------------------------|-----------|--------------------------------------------------------------------------------------------------------------------------------------------------------------------|---------------------------------------------------------------------------------------------------------------------------|
| Co/W ratio                                                                                                                                                                                                         | Topology  | Co <sup>II</sup> complex                                                                                                                                           | Magnetic properties                                                                                                       |
| 3:2                                                                                                                                                                                                                | 3,2-chain | <b>O<sub>h</sub></b><br>[Co <sup>II</sup> (tptz)(H <sub>2</sub> O)(NC) <sub>2</sub> ] and<br>[Co <sup>II</sup> (H <sub>2</sub> O) <sub>4</sub> (NC) <sub>2</sub> ] | <b>Ferromagnetic intrachain coupling</b><br><b>Onset of SCM behaviour, Lack of magnetic hysteresis loop down to 1.8 K</b> |

## VII [S12]

| {[Co <sup>II</sup> (tmp)(DMF)] <sub>2</sub> [Co <sup>II</sup> (DMF) <sub>4</sub> ][W <sup>V</sup> (CN) <sub>8</sub> ] <sub>2</sub> ·2DMF / tmp = 1,1,1-trispyrazolylmethane |           |                                                                                                                                         |                                                                                                                                                                                                                                                                                                                                                                                                                                                                                                                                                                                                                                |
|-----------------------------------------------------------------------------------------------------------------------------------------------------------------------------|-----------|-----------------------------------------------------------------------------------------------------------------------------------------|--------------------------------------------------------------------------------------------------------------------------------------------------------------------------------------------------------------------------------------------------------------------------------------------------------------------------------------------------------------------------------------------------------------------------------------------------------------------------------------------------------------------------------------------------------------------------------------------------------------------------------|
| Co/W ratio                                                                                                                                                                  | Topology  | Co <sup>II</sup> complex                                                                                                                | Magnetic properties                                                                                                                                                                                                                                                                                                                                                                                                                                                                                                                                                                                                            |
| 3:2                                                                                                                                                                         | 3,2-chain | <b>O<sub>h</sub></b><br>[Co <sup>II</sup> (tmp)(DMF)(NC) <sub>2</sub> ] and<br>[Co <sup>II</sup> (DMF) <sub>4</sub> (NC) <sub>2</sub> ] | <b>Ferromagnetic intrachain coupling</b><br><b>Antiferromagnetic interchain interactions</b><br><b>Field-induced metamagnetic transition</b><br>with $H_c = 300$ Oe at $T = 1.8$ K<br><b>Antiferromagnetic long-range ordering</b><br>below $T_N = 3.4$ K<br><b>Single-Chain Magnet (SCM)</b><br>$\Delta_\tau$ (infinite-size chain) = 57.1(4) K (38.3(2) cm <sup>-1</sup> )<br>$\Delta_\tau$ (finite-size chain) = 45.8(3) K (25.1(7) cm <sup>-1</sup> )<br>$\tau_0$ values between 10 <sup>-7</sup> and 10 <sup>-10</sup> s<br><b>Magnetic hysteresis loop at <math>T = 1.8</math> K</b><br>$H_c = 40$ Oe, $M_r = 0.6 \mu_B$ |

## VIII [\*]

| {[Co <sup>II</sup> (bpp)Cl <sub>0.5</sub> (H <sub>2</sub> O) <sub>0.5</sub> ] <sub>2</sub> [W <sup>V</sup> (CN) <sub>8</sub> ] <sub>2</sub> ·2H <sub>2</sub> O (2) / bpp = 2,6-di(1-pyrazolyl)pyridine |                                         |                                                                                                                                          |                                                                                                                                                                                                                                                                                                                                                                                                                                                                                                                                                                                                                  |
|--------------------------------------------------------------------------------------------------------------------------------------------------------------------------------------------------------|-----------------------------------------|------------------------------------------------------------------------------------------------------------------------------------------|------------------------------------------------------------------------------------------------------------------------------------------------------------------------------------------------------------------------------------------------------------------------------------------------------------------------------------------------------------------------------------------------------------------------------------------------------------------------------------------------------------------------------------------------------------------------------------------------------------------|
| Co/W ratio                                                                                                                                                                                             | Topology                                | Co <sup>II</sup> complex                                                                                                                 | Magnetic properties                                                                                                                                                                                                                                                                                                                                                                                                                                                                                                                                                                                              |
| 2:1                                                                                                                                                                                                    | chains<br>of vertex-<br>sharing squares | <b>O<sub>h</sub></b><br>[Co <sup>II</sup> (bpp)(Cl) <sub>0.5</sub> (H <sub>2</sub> O) <sub>0.5</sub> (CN) <sub>2</sub> ] <sup>0.5-</sup> | <b>Ferromagnetic intrachain coupling</b><br><b>Antiferromagnetic interchain interactions</b><br><b>Field-induced metamagnetic transition</b><br>with $H_c = 2180$ Oe at $T = 2$ K<br>(two-step transition in the 3–7 K)<br><b>Antiferromagnetic long-range ordering</b><br>below $T_N = 9.5$ K<br><b>Single-Chain Magnet (SCM)</b><br>$\Delta_\tau$ (infinite-size chain) – not observed<br>$\Delta_\tau$ (finite-size chain) = 65(1) K (45.4(7) cm <sup>-1</sup> )<br>with $\tau_0 = 2.1(7) \cdot 10^{-10}$ s<br><b>Magnetic hysteresis loop at <math>T = 1.8</math> K</b><br>$H_c = 700$ Oe, $M_r = 0.4 \mu_B$ |

## IX [\*]

| {[Co <sup>II</sup> (bpp)Br <sub>0.5</sub> (H <sub>2</sub> O) <sub>0.5</sub> ] <sub>2</sub> [W <sup>V</sup> (CN) <sub>8</sub> ] <sub>2</sub> ·2H <sub>2</sub> O (2) / bpp = 2,6-di(1-pyrazolyl)pyridine |                                         |                                                                                                                                          |                                                                                                                                                                                                                                                                                                                                                                                                                                                                                                                                                                                                                     |
|--------------------------------------------------------------------------------------------------------------------------------------------------------------------------------------------------------|-----------------------------------------|------------------------------------------------------------------------------------------------------------------------------------------|---------------------------------------------------------------------------------------------------------------------------------------------------------------------------------------------------------------------------------------------------------------------------------------------------------------------------------------------------------------------------------------------------------------------------------------------------------------------------------------------------------------------------------------------------------------------------------------------------------------------|
| Co/W ratio                                                                                                                                                                                             | Topology                                | Co <sup>II</sup> complex                                                                                                                 | Magnetic properties                                                                                                                                                                                                                                                                                                                                                                                                                                                                                                                                                                                                 |
| 2:1                                                                                                                                                                                                    | chains<br>of vertex-<br>sharing squares | <b>O<sub>h</sub></b><br>[Co <sup>II</sup> (bpp)(Br) <sub>0.5</sub> (H <sub>2</sub> O) <sub>0.5</sub> (CN) <sub>2</sub> ] <sup>0.5-</sup> | <b>Ferromagnetic intrachain coupling</b><br><b>Antiferromagnetic interchain interactions</b><br><b>Field-induced metamagnetic transition</b><br>with $H_c = 2050$ Oe at $T = 2$ K<br>(two-step transition in the 3–7 K)<br><b>Antiferromagnetic long-range ordering</b><br>below $T_N = 9.4$ K<br><b>Single-Chain Magnet (SCM)</b><br>$\Delta_\tau$ (infinite-size chain) – not observed<br>$\Delta_\tau$ (finite-size chain) = 59.7(8) K<br>(41.5(4) cm <sup>-1</sup> ) with $\tau_0 = 5.6(8) \cdot 10^{-10}$ s<br><b>Magnetic hysteresis loop at <math>T = 1.8</math> K</b><br>$H_c = 450$ Oe, $M_r = 0.32 \mu_B$ |

\*This work

S8 R.-M. Wei, F. Cao, J. Li, L. Yang, Y. Han, X.-L. Zhang, Z. Zhang, X.-Y. Wang, Y. Song, Single-Chain Magnets Based on Octacyanotungstate with the Highest Energy Barrier for Cyanide Compounds, *Sci. Rep.*, 2016, **6**, 24372.

S9 D. Li, L. Zheng, Y. Zhang, J. Huang, S. Gao, W. Tang, Coexistence of Long-Range Ferromagnetic Ordering and Glassy Behavior in One-Dimensional Bimetallic Cyano-Bridged Polymers, *Inorg. Chem.* 2003, **42**, 6123–6129

S10 S. Chorazy, K. Nakabayashi, K. Imoto, J. Mlynarski, B. Sieklucka, S. Ohkoshi, Conjunction of Chirality and Slow Magnetic Relaxation in the Supramolecular Network Constructed of Crossed Cyano-Bridged Co<sup>II</sup>–W<sup>V</sup> Molecular Chains, *J. Am. Chem. Soc.*, 2012, **134**, 16151–16154.

S11 H. Zhao, A. J. Brown, A. V. Prosvirin, K. R. Dunbar, One-dimensional square- and ladder-type architectures incorporating octacyanomethylates of molybdenum(V) and tungsten(V), *Polyhedron*, 2013, **64**, 321–327.

S12 Y.-Z. Zhang, B. S. Dolinar, S. Liu, A. J. Brown, X. Zhang, Z.-X. Wang and K. R. Dunbar, Enforcing Ising-like magnetic anisotropy via trigonal distortion in the design of a W(V)–Co(II) cyanide single-chain magnet, *Chem. Sci.*, 2018, **9**, 119–124.
